# Supplementary material for: Bibliometric Analysis of Dendritic Epidermal T Cell (DETC) Research From 1983 to 2019
Source: Front Immunol. 2020 Mar 12;11:259. doi: 10.3389/fimmu.2020.00259 (PMC7080701; doi:10.3389/fimmu.2020.00259)
Supplement: Supplementary file 2 [file Table_2.XLSX]

## Sheet: Articles Related to DETC resear
Authors	Author(s) ID	Title	Year	Source title	Volume	Issue	Art. No.	Page start	Page end	Page count	Cited by	DOI	Link	Affiliations	Authors with affiliations	Abstract	Author Keywords	Index Keywords	Molecular Sequence Numbers	Chemicals/CAS	Tradenames	Manufacturers	References	Correspondence Address	Editors	Sponsors	Publisher	Conference name	Conference date	Conference location	Conference code	ISSN	ISBN	CODEN	PubMed ID	Language of Original Document	Abbreviated Source Title	Document Type	Publication Stage	Access Type	Source	EID
Tschachler E., Schuler G., Hutterer J., Leibl H., Wolff K., Stingl G.	56273310700;7202657059;57207627876;6701766769;35391524200;7102655442;	Expression of Thy-1 antigen by murine epidermal cells	1983	Journal of Investigative Dermatology	81	3		282	285		116	10.1111/1523-1747.ep12518326	https://www.scopus.com/inward/record.uri?eid=2-s2.0-0020506414&doi=10.1111%2f1523-1747.ep12518326&partnerID=40&md5=28568f60fb2db3ef1f4f0f930e1d2bc9	Dep. Dermatol. I, Univ. Vienna, A-1090 Vienna, Austria	Tschachler, E., Dep. Dermatol. I, Univ. Vienna, A-1090 Vienna, Austria; Schuler, G., Dep. Dermatol. I, Univ. Vienna, A-1090 Vienna, Austria; Hutterer, J., Dep. Dermatol. I, Univ. Vienna, A-1090 Vienna, Austria; Leibl, H.; Wolff, K.; Stingl, G.	We report on the occurrence of a cell population within the murine epidermis which, by both morphologic and surface property criteria, is distinct from all other epidermal cell types known so far. These previously unrecognized cells are evenly distributed within the epidermis, display a primarily dendritic shape, exhibit a lobulated nucleus, contain large amounts of vimentin type intermediate-siz…		monoclonal antibody; Thy 1 antigen; animal cell; blood and hemopoietic system; epidermis; mouse; nonhuman														0022202X		JIDEA		English	J. INVEST. DERMATOL.	Article	Final	Open Access	Scopus	2-s2.0-0020506414
Bergstresser P.R., Tigelaar R.E., Dees J.H., Streilein J.W.	7007054829;7007168145;57196575176;35425922200;	Thy-1 antigen-bearing dendritic cells populate murine epidermis	1983	Journal of Investigative Dermatology	81	3		286	288		127	10.1111/1523-1747.ep12518332	https://www.scopus.com/inward/record.uri?eid=2-s2.0-0020629640&doi=10.1111%2f1523-1747.ep12518332&partnerID=40&md5=70c7ea44927db703b18350923f55d43c	Dep. Dermatol., Univ. Texas Health Sci. Cent., Dallas, TX, United States	Bergstresser, P.R., Dep. Dermatol., Univ. Texas Health Sci. Cent., Dallas, TX, United States; Tigelaar, R.E., Dep. Dermatol., Univ. Texas Health Sci. Cent., Dallas, TX, United States; Dees, J.H., Dep. Dermatol., Univ. Texas Health Sci. Cent., Dallas, TX, United States; Streilein, J.W., Dep. Dermatol., Univ. Texas Health Sci. Cent., Dallas, TX, United States	Two distinct cell populations, melanocytes and Langerhans cells (LC), have been recognized previously to possess dendritic configuration in normal mammalian epidermis. Employing immunofluorescence microscopy with monoclonal antibodies against Thy-1,2 antigen to identify cells in whole mounts of murine epidermis, we have identified a third dendritic cell population which differs from both LC and m…		Thy 1 antigen; animal cell; electron microscopy; endocrine system; epidermis; Langerhans cell; mouse; nonhuman; T cell lymphoma; T lymphocyte														0022202X		JIDEA	6136547	English	J. INVEST. DERMATOL.	Article	Final	Open Access	Scopus	2-s2.0-0020629640
Bergstresser P.R., Tigelaar R.E., Streilein J.W.	7007054829;7007168145;35425922200;	Thy-1 antigen-bearing dendritic cells in murine epidermis are derived from bone marrow precursors	1984	Journal of Investigative Dermatology	83	2		83	87		31	10.1111/1523-1747.ep12262587	https://www.scopus.com/inward/record.uri?eid=2-s2.0-0021213711&doi=10.1111%2f1523-1747.ep12262587&partnerID=40&md5=54ddb6c5bd5fc01cace169c1a8677c5c	Department of Dermatology, The University of Texas Health Science Center at Dallas, Southwestern Medical School, Dallas, TX 75235, United States	Bergstresser, P.R., Department of Dermatology, The University of Texas Health Science Center at Dallas, Southwestern Medical School, Dallas, TX 75235, United States; Tigelaar, R.E., Department of Dermatology, The University of Texas Health Science Center at Dallas, Southwestern Medical School, Dallas, TX 75235, United States; Streilein, J.W., Department of Dermatology, The University of Texas Hea…	Thy-1 antigen is expressed on a dendritic subpopulation of cells in murine epidermis. Numbering between 200 and 500/mm2 surface area in abdominal skin, they are distinct from the dendritic Langerhans cells (LCs) and melanocytes. Since immigrant lymphoid cells as well as constructive cells in various organs have been demonstrated to be Thy-1+, their origin and function are not certain. To assess t…		animal cell; article; blood and hemopoietic system; bone marrow; endocrine system; epidermis; etiology; histology; Langerhans cell; mouse; nonhuman; ontogeny; stem cell														0022202X		JIDEA	6147381	English	J. INVEST. DERMATOL.	Article	Final	Open Access	Scopus	2-s2.0-0021213711
Breathnach S.M., Katz S.I.	7006207828;7403462507;	Thy-1+ dendritic cells in murine epidermis are bone marrow-derived	1984	Journal of Investigative Dermatology	83	1		74	77		26	10.1111/1523-1747.ep12261808	https://www.scopus.com/inward/record.uri?eid=2-s2.0-0021252794&doi=10.1111%2f1523-1747.ep12261808&partnerID=40&md5=bd3bdc444d0f7eb8bd60f527cbd9027d	Dermatology Branch, National Cancer Institute, National Institutes of Health, Bethesda, MD, United States	Breathnach, S.M., Dermatology Branch, National Cancer Institute, National Institutes of Health, Bethesda, MD, United States; Katz, S.I., Dermatology Branch, National Cancer Institute, National Institutes of Health, Bethesda, MD, United States	Thy-1+, Ly-5+ dendritic cells have recently been described as a resident cell population in murine epidermis, but their ontogeny and function are unknown. We therefore investigated the origin and turnover of epidermal Thy-1+ cells utilizing chimeric mice. Lethally x-irradiated AKR/J (Thy-1.1+) and AKR/Cum Thy-1.2+) mice were reconstituted with allogeneic bone marrow cells with or without thymocyt…		animal experiment; blood and hemopoietic system; bone marrow; cytology; endocrine system; epidermis; Langerhans cell; Merkel cell; mouse; nonhuman; ontogeny; T lymphocyte; thymocyte; thymus														0022202X		JIDEA	6376643	English	J. INVEST. DERMATOL.	Article	Final	Open Access	Scopus	2-s2.0-0021252794
Streilein J.W.	35425922200;	Circuits and signals of the skin-associated lymphoid tissues (SALT)	1985	Journal of Investigative Dermatology	85	SUPPL. 1		10s	13s		51		https://www.scopus.com/inward/record.uri?eid=2-s2.0-0022374684&partnerID=40&md5=fb137e6ad1eb1649eee687ae47e9c8d8	Department of Microbiology and Immunology, University of Miami School of Medicine, Miami, FL 33101, United States	Streilein, J.W., Department of Microbiology and Immunology, University of Miami School of Medicine, Miami, FL 33101, United States	The existence of a specialized set of skin-associated lymphoid tissues (SALT) was proposed several years ago as a means of accounting for (a) epidermotropism of certain malignant lymphocytes, (b) immunocompetent cells within skin, and (c) expression of histocompatibility antigens on cutaneous cells derived from hematopoietic precursors. The proposal was supported by observations of (a) in vivo an…		antigen presentation; cytology; dendritic cell; endocrine system; human; human cell; langerhans cell; priority journal; short survey; t lymphocyte; Animal; Antigens; Dermatitis, Contact; Haptens; Human; Langerhans Cells; Lymphocytes; Lymphoid Tissue; Mice; Skin; Support, U.S. Gov't, P.H.S.; Ultraviolet Rays		Antigens; Haptens												0022202X		JIDEA	4008979	English	J. INVEST. DERMATOL.	Article	Final		Scopus	2-s2.0-0022374684
Leibl H., Hutterer J., Korschan H., Schuler G., Tani M., Tschachler E., Romani N., Wolff K., Stingl G.	6701766769;57207627876;6506194615;7202657059;7202548786;56273310700;7006153713;35391524200;7102655442;	Expression of the Ly-5 alloantigenic system on epidermal cells	1985	Journal of Investigative Dermatology	84	2		91	95		5	10.1111/1523-1747.ep12274957	https://www.scopus.com/inward/record.uri?eid=2-s2.0-0021906731&doi=10.1111%2f1523-1747.ep12274957&partnerID=40&md5=67b0ed89049f074bf1eadd91a2ce8d92	Department of Dermatology, University of Vienna, A-1090 Vienna, Austria	Leibl, H., Department of Dermatology, University of Vienna, A-1090 Vienna, Austria; Hutterer, J., Department of Dermatology, University of Vienna, A-1090 Vienna, Austria; Korschan, H., Department of Dermatology, University of Vienna, A-1090 Vienna, Austria; Schuler, G.; Tani, M.; Tschachler, E.; Romani, N.; Wolff, K.; Stingl, G.	The expression of Ly-5 alloantigens is confined to hemopoietic cell types and is therefore considered a valuable indicator for the bone marrow derivation of a given cell. The further finding that different hemopoietic cell lineages express different molecular forms of the Ly-5 alloantigens prompted us to investigate (1) whether murine epidermal cells or subpopulations thereof express Ly-5 specifi…		alloantigen; Ly antigen; epidermis cell; human; human cell; immunofluorescence; priority journal														0022202X		JIDEA		English	J. INVEST. DERMATOL.	Article	Final	Open Access	Scopus	2-s2.0-0021906731
Sullivan S., Bergstresser P.R., Tigelaar R.E., Streilein J.W.	57196619375;7007054829;7007168145;35425922200;	FACS purification of bone marrow-derived epidermal populations in mice: Langerhans cells and Thy-1+ dendritic cells	1985	Journal of Investigative Dermatology	84	6		491	495		49	10.1111/1523-1747.ep12273454	https://www.scopus.com/inward/record.uri?eid=2-s2.0-0021809065&doi=10.1111%2f1523-1747.ep12273454&partnerID=40&md5=09290cce546c5bfcbb3abafb10ae55ce	Graduate Program in Immunology, Department of Cell Biology, University of Texas Health Science Center at Dallas, Dallas, TX 75235, United States	Sullivan, S., Graduate Program in Immunology, Department of Cell Biology, University of Texas Health Science Center at Dallas, Dallas, TX 75235, United States; Bergstresser, P.R., Graduate Program in Immunology, Department of Cell Biology, University of Texas Health Science Center at Dallas, Dallas, TX 75235, United States; Tigelaar, R.E., Graduate Program in Immunology, Department of Cell Biolog…	A method was developed which allows for the separation and purification of Langerhans cells (LC) and Thy-1+ cells (Thy-1+dEC) from mouse epidermis. Epidermal cell (EC) suspensions were subjected to Ficoll separation, and the resulting interface EC were harvested. These EC were then 'tagged' with the appropriate monoclonal antibody and sorted into positive and negative populations using the Fluore…		lymphocyte antigen; membrane antigen; monoclonal antibody; animal cell; animal experiment; blood and hemopoietic system; bone marrow derived cell; dendritic cell; diagnosis; endocrine system; fluorescence activated cell sorter; histology; in vitro study; Langerhans cell; mouse; nonhuman; preliminary communication; priority journal														0022202X		JIDEA	3998496	English	J. INVEST. DERMATOL.	Article	Final	Open Access	Scopus	2-s2.0-0021809065
Cooper K.D., Breathnach S.M., Caughman S.W., Palini A.G., Waxdal M.J., Katz S.I.	55094660300;7006207828;57192932489;55335697800;7003594161;7403462507;	Fluorescence microscopic and flow cytometric analysis of bone marrow-derived cells in human epidermis: A search for the human analogue of the murine dendritic Thy-1+ epidermal cell	1985	Journal of Investigative Dermatology	85	6		546	552		39	10.1111/1523-1747.ep12277391	https://www.scopus.com/inward/record.uri?eid=2-s2.0-0022347966&doi=10.1111%2f1523-1747.ep12277391&partnerID=40&md5=442573c16400ea22fa2d870a5480e767	Dermatology Branch, National Cancer Institute, National Institutes of Health, Bethesda, MD 20205, United States	Cooper, K.D., Dermatology Branch, National Cancer Institute, National Institutes of Health, Bethesda, MD 20205, United States; Breathnach, S.M., Dermatology Branch, National Cancer Institute, National Institutes of Health, Bethesda, MD 20205, United States; Caughman, S.W., Dermatology Branch, National Cancer Institute, National Institutes of Health, Bethesda, MD 20205, United States; Palini, A.G.…	Lymphoid cells with an affinity for the epidermis (epidermotropic lymphocytes) have been proposed to play a role in the immune functions of the epidermis. However, antigen-presenting Langerhans cells (LC) and indeterminate cells are presently the only cells in the human epidermis which have been demonstrated to originate in the bone marrow. Recent studies of murine epidermis have identified a pop…		Thy 1 antigen; dendritic cell; epidermis; flow cytometry; human; human cell; immunofluorescence; priority journal														0022202X		JIDEA		English	J. INVEST. DERMATOL.	Article	Final	Open Access	Scopus	2-s2.0-0022347966
Romani N., Tschachler E., Schuler G., Aberer W., Ceredig R., Elbe A., Wolff K., Fritsch P.O., Stingl G.	7006153713;56273310700;7202657059;7004555939;7005497379;7003877845;35391524200;19334289700;7102655442;	Morphological and phenotypical characterization of bone marrow-derived dendritic Thy-1-positive epidermal cells of the mouse	1985	Journal of Investigative Dermatology	85	SUPPL. 1		S91	S95		6	10.1111/1523-1747.ep12275557	https://www.scopus.com/inward/record.uri?eid=2-s2.0-0022407532&doi=10.1111%2f1523-1747.ep12275557&partnerID=40&md5=a92cfa614e09e7bc2e5083b546c79c2b	Department of Dermatology, University of Innsbruck Medical School, Innsbruck, Austria	Romani, N., Department of Dermatology, University of Innsbruck Medical School, Innsbruck, Austria; Tschachler, E., Department of Dermatology, University of Innsbruck Medical School, Innsbruck, Austria; Schuler, G., Department of Dermatology, University of Innsbruck Medical School, Innsbruck, Austria; Aberer, W.; Ceredig, R.; Elbe, A.; Wolff, K.; Fritsch, P.O.; Stingl, G.	Increasing evidence exists that the spectrum of dendritic cells within the epidermis is more complex than previously thought. In addition to Langerhans cells, Merkel cells, and melanocytes, the murine epidermis contains a dendritic cell population whose most prominent phenotypic feature is the Thy-1 antigen. These cells are now generally referred to as dendritic Thy-1+ epidermal cells (dThy-1+EC)…		Thy 1 antigen; dendritic cell; electron microscopy; epidermis; morphology; mouse; nonhuman; ontogeny; phenotype; priority journal; short survey; ultrastructure														0022202X		JIDEA		English	J. INVEST. DERMATOL.	Article	Final	Open Access	Scopus	2-s2.0-0022407532
Bergstresser P.R., Sullivan S., Streilein J.W., Tigelaar R.E.	7007054829;57196619375;35425922200;7007168145;	Origin and function of Thy-1+ dendritic epidermal cells in mice	1985	Journal of Investigative Dermatology	85	SUPPL. 1		S85	S90		44	10.1111/1523-1747.ep12275516	https://www.scopus.com/inward/record.uri?eid=2-s2.0-0022352689&doi=10.1111%2f1523-1747.ep12275516&partnerID=40&md5=fbd4b8979a11dfdfc3fc8361002b1217	Department of Dermatology, University of Texas Health Science Center, Dallas, TX 75235, United States	Bergstresser, P.R., Department of Dermatology, University of Texas Health Science Center, Dallas, TX 75235, United States; Sullivan, S., Department of Dermatology, University of Texas Health Science Center, Dallas, TX 75235, United States; Streilein, J.W., Department of Dermatology, University of Texas Health Science Center, Dallas, TX 75235, United States; Tigelaar, R.E., Department of Dermatolo…	The epidermis of normal mouse skin incorporates a newly-recognized population of dendritic cells which express relatively large amounts of the cell surface glycoprotein, Thy-1 antigen. These cells, termed Thy-1+dEC, are distinct from both epidermal Langerhans cells (LC) and melanocytes, and they populate cutaneous sites in surface densities which range to as high as 580 cells/mm2, approximately t…		Thy 1 antigen; animal cell; cell function; cytology; dendritic cell; endocrine system; epidermis; Langerhans cell; mouse; nonhuman; ontogeny; priority journal; short survey; skin														0022202X		JIDEA	2409184	English	J. INVEST. DERMATOL.	Article	Final	Open Access	Scopus	2-s2.0-0022352689
Charley M.R., Mikhael A., Hoot G., Hackett J., Bennett M.	6601955385;6603344624;6507185806;7102250036;7403467973;	Studies addressing the mechanism of anti-asialo GM1 prevention of graft-versus-host disease due to minor histocompatibility antigenic differences	1985	Journal of Investigative Dermatology	85	SUPPL. 1		S121	S123		6	10.1111/1523-1747.ep12275630	https://www.scopus.com/inward/record.uri?eid=2-s2.0-0022394433&doi=10.1111%2f1523-1747.ep12275630&partnerID=40&md5=a8cb9d39f7302cd80c0384ff17298923	Department of Dermatology, Southwestern Medical School, University of Texas Health Science Center at Dallas, Dallas, TX 75235, United States	Charley, M.R., Department of Dermatology, Southwestern Medical School, University of Texas Health Science Center at Dallas, Dallas, TX 75235, United States; Mikhael, A., Department of Dermatology, Southwestern Medical School, University of Texas Health Science Center at Dallas, Dallas, TX 75235, United States; Hoot, G., Department of Dermatology, Southwestern Medical School, University of Texas H…	In mice, as in humans, lethal graft-versus-host disease (GVHD) with skin involvement often occurs in immunoincompetent recipients of donor hematopoietic cells in spite of matching at major histocompatibility loci and nonreactivity in mixed lymphocyte culture, if donor and recipient are disparate at several minor histocompatibility loci. In mice, both death and skin disease can be prevented by the…		gangliotetraosylceramide; histocompatibility antigen; animal experiment; blood and hemopoietic system; bone marrow transplantation; graft versus host reaction; heredity; mixed lymphocyte reaction; mouse; nonhuman; priority journal; spleen; therapy; thymus		gangliotetraosylceramide, 71012-19-6												0022202X		JIDEA		English	J. INVEST. DERMATOL.	Article	Final	Open Access	Scopus	2-s2.0-0022394433
CHAMBERS D.A.	7202907273;	The Thy‐I epidermal cell: perspective and prospective	1985	British Journal of Dermatology	113			24	33		10	10.1111/j.1365-2133.1985.tb15623.x	https://www.scopus.com/inward/record.uri?eid=2-s2.0-0021849707&doi=10.1111%2fj.1365-2133.1985.tb15623.x&partnerID=40&md5=49445101a9e9005cafce77c3be29522b	Center for Research in Periodontal Diseases and Oral Molecular Biology; Departments of Biological Chemistry and Dermatology, University of Illinois Health Sciences Center, Chicago, Illinois, 60612, United States	CHAMBERS, D.A., Center for Research in Periodontal Diseases and Oral Molecular Biology, Departments of Biological Chemistry and Dermatology, University of Illinois Health Sciences Center, Chicago, Illinois, 60612, United States	Recently a class of cells distinguished by the presence of the cell‐surface protein, Thy‐I, has been discovered in the epidermis. These cells constitute a heterogeneous population such that they may be dendritic or round, and may be derived from both mesenchymal and ectodermal tissue. Phenotypically, cells with the following characteristics have been observed: Thy‐I +, Vim +; Thy‐I+, Vim‐; Thy‐I+…		Ia antigen; thy 1 antigen; animal cell; animal experiment; diagnosis; epidermis cell; histology; immunity; in vitro study; mouse; nonhuman; normal value; preliminary communication; priority journal; skin; Animal; Antigens, Surface; Antigens, Thy-1; Cells, Cultured; Epidermis; Fluorescent Antibody Technique; Mice; Mice, Inbred BALB C; Mice, Nude; Skin; Support, U.S. Gov't, P.H.S.		Antigens, Surface; Antigens, Thy-1			Bergstresse, P.R., Tigelaar, R.E., Dees, J.H., Streilein, J.W., Thy‐1 antigen bearing dendritic cells populate murine epidermis (1983) Journal of Investigative Dermatology, 81, p. 286; Bergstresser, P.R., Tighlaar, R.E., Streilein, J.W., Thy‐1+ antigen‐bearing dendritic cells in murine epidermis are derived from bone marrow precursors (1984) Journal of Investigative Dermatology, 83, p. 83; Breath…	CHAMBERS, D.A.; Center for Research in Periodontal Diseases and Oral Molecular Biology, 801 South Paulina Street, Chicago, Illinois, 60612, United States								70963			2861845	English	Br. J. Dermatol.	Article	Final		Scopus	2-s2.0-0021849707
Alba S., Tagami H.	35393575200;7101834005;	Changes in expression of Ia, Thy-1, and Ly-5 antigens in epidermal cells during delayed contact sensitivity reactions in mice: Flow cytometric analysis	1986	Journal of Investigative Dermatology	86	2		121	124		4		https://www.scopus.com/inward/record.uri?eid=2-s2.0-0022580709&partnerID=40&md5=fdd38d126a6ac6aaf4166b50a505bec1	Department of Dermatology, Tohoku University School of Medicine, Sendai, Japan	Alba, S., Department of Dermatology, Tohoku University School of Medicine, Sendai, Japan; Tagami, H., Department of Dermatology, Tohoku University School of Medicine, Sendai, Japan	Ia antigen-bearing (Ia+) Langerhans cells have attained an important position as immunocompetent cells in the epidermis. Recently there have been successive reports on other new possible candidates for immunocompetent cells in the epidermis, i.e., Ia+ keratinocytes and dendritic Thy-1 antigen-bearing (Thy-1+) epidermal cells which also express Ly-5 antigen and asialo-GM1. Based on our previous fi…		animal cell; cell suspension; contact sensitivity; delayed hypersensitivity; dendritic cell; endocrine system; epidermis cell; etiology; langerhans cell; mouse; nonhuman; priority journal; Animal; Antibodies, Monoclonal; Antigens, Ly; Antigens, Surface; Antigens, Thy-1; Dermatitis, Contact; Flow Cytometry; Histocompatibility Antigens Class II; Male; Mice; Mice, Inbred C3H; Skin		Antibodies, Monoclonal; Antigens, Ly; Antigens, Surface; Antigens, Thy-1; Histocompatibility Antigens Class II				Alba, S.; Department of Dermatology, Tohoku University School of Medicine, Sendai, Japan								0022202X		JIDEA	2875113	English	J. Invest. Dermatol.	Article	Final		Scopus	2-s2.0-0022580709
Wright Caughman S., Breathnach S.M., Sharrow S.O., Stephany D.A., Katz S.I.	6508024931;7006207828;7006830105;6601997744;7403462507;	Culture and characterization of murine dendritic Thy-1+ epidermal cells	1986	Journal of Investigative Dermatology	86	6		615	624		16		https://www.scopus.com/inward/record.uri?eid=2-s2.0-0022640373&partnerID=40&md5=6814a573100bee5c66297c934a19c202	Dermatology Branch, National Cancer Institute, Bethesda, MD, United States; Immunology Branch, National Cancer Institute, Bethesda, MD, United States	Wright Caughman, S., Dermatology Branch, National Cancer Institute, Bethesda, MD, United States; Breathnach, S.M., Dermatology Branch, National Cancer Institute, Bethesda, MD, United States; Sharrow, S.O., Immunology Branch, National Cancer Institute, Bethesda, MD, United States; Stephany, D.A., Immunology Branch, National Cancer Institute, Bethesda, MD, United States; Katz, S.I., Dermatology Bra…	Although numerous advances have been made in characterizing the phenotype, ontogeny, ultrastructure, and cytochemistry of the murine Thy-1+ dendritic epidermal cell (Thy-1+ EC), elucidation of its functional qualities has been hampered by the difficulty in preparing pure populations of these cells. We therefore sought to obtain expanded, purified populations of Thy-1+ EC using culture techniques.…		alloantigen; thy 1 antigen; animal cell; biological model; cell culture; dendritic cell; epidermis; in vitro study; mouse; nonhuman; priority journal; Animals; Antigens, Ly; Antigens, Surface; Antigens, Thy-1; Cells, Cultured; Concanavalin A; Female; Indomethacin; Lymphoid Tissue; Male; Mice; Mice, Inbred NZB; Mice, Inbred Strains; Microscopy, Electron; Phenotype; Skin; T-Lymphocytes; Trypsin		Antigens, Ly; Antigens, Surface; Antigens, Thy-1; Concanavalin A, 11028-71-0; Indomethacin, 53-86-1; Trypsin, 3.4.21.4				Wright Caughman, S.; Dermatology Branch, National Cancer Institute, Bethesda, MD, United States								0022202X		JIDEA	2872251	English	J. Invest. Dermatol.	Article	Final		Scopus	2-s2.0-0022640373
Aberer W., Romani N., Elbe A., Stingl G.	7004555939;7006153713;7003877845;7102655442;	Effects of physicochemical agents on murine epidermal Langerhans cells and Thy-1-positive dendritic epidermal cells	1986	Journal of Immunology	136	4		1210	1216		54		https://www.scopus.com/inward/record.uri?eid=2-s2.0-0022640693&partnerID=40&md5=de483ef477c90ae641b9d0aa66293d09	Department of Dermatology I, Immunobiology Unit, University of Vienna, A-1090 Vienna, Austria	Aberer, W., Department of Dermatology I, Immunobiology Unit, University of Vienna, A-1090 Vienna, Austria; Romani, N., Department of Dermatology I, Immunobiology Unit, University of Vienna, A-1090 Vienna, Austria; Elbe, A., Department of Dermatology I, Immunobiology Unit, University of Vienna, A-1090 Vienna, Austria; Stingl, G., Department of Dermatology I, Immunobiology Unit, University of Vienn…	The possibility that Thy-1-positive dendritic epidermal cells (Thy-1+DEC) may contribute to the immunologic functions of murine epidermal cells (EC) prompted us to simultaneously assess the effects of certain immunomodulating physicochemical agents on both Thy-1+DEC and Ia-bearing Langerhans cells (LC). C3H/H3 mice received one of the following treatment modalities: 1) UV-B irradiation (four cons…		glucocorticoid; membrane antigen; monoclonal antibody; animal experiment; dendritic cell; endocrine system; epidermis cell; in vitro study; langerhans cell; mouse; nonhuman; priority journal; puva; Animal; Antigen-Presenting Cells; Antigens, Surface; Antigens, Thy-1; Epidermis; Histocompatibility Antigens Class II; Langerhans Cells; Male; Methoxsalen; Mice; Mice, Inbred C3H; Phenotype; PUVA Thera…		Antigens, Surface; Antigens, Thy-1; Histocompatibility Antigens Class II; Methoxsalen, 298-81-7; Triamcinolone Acetonide, 76-25-5												221767		JOIMA	2868057	English	J. IMMUNOL.	Article	Final		Scopus	2-s2.0-0022640693
Stingl G., Aberer W., Romani N., Elbe A., Tschachler E.	7102655442;7004555939;7006153713;7003877845;56273310700;	Effects of short-wave UV and PUVA treatment on structure and phenotype of bone marrow-derived dendritic cells of the mouse epidermis.	1986	Current problems in dermatology	15			195	204		2		https://www.scopus.com/inward/record.uri?eid=2-s2.0-0022597318&partnerID=40&md5=93abe4fa98b7201087774724691dd1ad		Stingl, G.; Aberer, W.; Romani, N.; Elbe, A.; Tschachler, E.	[No abstract available]		Antigens, Thy 1; HLA antigen class 2; membrane antigen; methoxsalen; Thy 1 antigen; animal; article; drug effect; epidermis; immunology; Langerhans cell; mouse; mouse strain; PUVA; radiation exposure; T lymphocyte; ultraviolet radiation; Animal; Antigens, Surface; Antigens, Thy-1; Epidermis; Histocompatibility Antigens Class II; Langerhans Cells; Methoxsalen; Mice; Mice, Inbred C3H; Mice, Inbred …		methoxsalen, 298-81-7, 8004-26-0; Antigens, Surface; Antigens, Thy-1; Histocompatibility Antigens Class II; Methoxsalen, 298-81-7				Stingl, G.								702064			2868838	English	Curr Probl Dermatol	Article	Final		Scopus	2-s2.0-0022597318
Tamaki K.	35390850700;	Heterogeneity of epidermal Thy-1-positive cells defined by lectin-binding sites	1986	Journal of Investigative Dermatology	86	3		222	225		2	10.1111/1523-1747.ep12285165	https://www.scopus.com/inward/record.uri?eid=2-s2.0-0022627124&doi=10.1111%2f1523-1747.ep12285165&partnerID=40&md5=e5d149666f3c5c8b5cd6d4d29f31db23	Department of Dermatology, Faculty of Medicine, University of Tokyo, Tokyo, Japan	Tamaki, K., Department of Dermatology, Faculty of Medicine, University of Tokyo, Tokyo, Japan	A new cell type that expresses Thy-1 antigen (dendritic epidermal Thy-l-positive cells, d-Thy-1 +EC) was discovered in the murine epidermis in 1983. It is not clear, however, whether all d-Thy-1 +EC represent a unitary population. We investigated the cell surface glycoconjugate pattern of d-Thy-1 +EC using 6 lectins: concanavalin A (Con-A), Dolichos biflorus agglutinin (DBA), Ricinus communis agg…		thy 1 antigen; animal cell; dendritic cell; epidermis; immunofluorescence; lectin binding site; mouse; nonhuman; priority journal; Animal; Antigens, Surface; Antigens, Thy-1; Epidermis; Female; Mice; Mice, Inbred Strains; Neuraminidase; Receptors, Mitogen; Species Specificity		Antigens, Surface; Antigens, Thy-1; Neuraminidase, EC 3.2.1.18; Receptors, Mitogen				Tamaki, K.; Department of Dermatology, Faculty of Medicine, University of Tokyo, Tokyo, Japan								0022202X		JIDEA	2875115	English	J. Invest. Dermatol.	Article	Final	Open Access	Scopus	2-s2.0-0022627124
M?ller A., Schwanitz H.-J., Czarnetzki B.M.	7401763649;7006478279;7102107195;	In vitro generation of chemotactic leukotrienes from unfractionated murine epidermal cells	1986	Journal of Investigative Dermatology	87	4		489	493		4	10.1111/1523-1747.ep12455554	https://www.scopus.com/inward/record.uri?eid=2-s2.0-0022551931&doi=10.1111%2f1523-1747.ep12455554&partnerID=40&md5=e8d41a776da680c81d4c2e7ed4a11d88	Department of Dermatology, University Clinics, Münster, Germany	M?ller, A., Department of Dermatology, University Clinics, Münster, Germany; Schwanitz, H.-J., Department of Dermatology, University Clinics, Münster, Germany; Czarnetzki, B.M., Department of Dermatology, University Clinics, Münster, Germany	Single cell suspensions of murine epidermal cells were studied for the generation of leukotrienes (LTs), using in vitro bioassays for chemotaxis, reverse-phase high-pressure liquid chromatography (HPLC), and radioimmunoassays (RIAs). A combination of arachidonic acid (AA) at 10-3-10-4 m with the calcium ionophore A 23187 at 5 × 10-6 m was the most potent stimulus, causing release of LTs within 10…		arachidonic acid; calcimycin; leukotriene; radioisotope; animal cell; chemotaxis; epidermis; etiology; high performance liquid chromatography; keratinocyte; mouse; nonhuman; priority journal		arachidonic acid, 506-32-1, 6610-25-9, 7771-44-0; calcimycin, 52665-69-7				Czarnetzki, B.M.; Department of Dermatology, University Clinics, Münster, Germany								0022202X		JIDEA	3020131	English	J. Invest. Dermatol.	Article	Final	Open Access	Scopus	2-s2.0-0022551931
Sullivan S., Bergstresser P.R., Tigelaar R.E., Streilein J.W.	57196619375;7007054829;7007168145;35425922200;	Induction and regulation of contact hypersensitivity by resident, bone marrow-derived, dendritic epidermal cells: Langerhans cells and Thy-1+ epidermal cells	1986	Journal of Immunology	137	8		2460	2467		107		https://www.scopus.com/inward/record.uri?eid=2-s2.0-0023032287&partnerID=40&md5=f7bbeb8826208d471009d185eb0b2950	Department of Cell Biology, The University of Texas Health Science Center at Dallas, Dallas, TX 75235, United States	Sullivan, S., Department of Cell Biology, The University of Texas Health Science Center at Dallas, Dallas, TX 75235, United States; Bergstresser, P.R., Department of Cell Biology, The University of Texas Health Science Center at Dallas, Dallas, TX 75235, United States; Tigelaar, R.E., Department of Cell Biology, The University of Texas Health Science Center at Dallas, Dallas, TX 75235, United Sta…	Circumstantial evidence suggests strongly that epidermal Langerhans cells (LC) alone among epidermal cells (EC) are responsible for generating an immunogenic signal for contact hypersensitivity (CH) after epicutaneous application of hapten. However, data obtained from previous studies performed with intact skin or isolated EC do not address the immunogenic capacity of a second dendritic, bone mar…		Ia antigen; thy 1 antigen; contact allergy; dendritic cell; endocrine system; epidermis; langerhans cell; mouse; nonhuman; priority journal; Animal; Antigens, Surface; Antigens, Thy-1; Bone Marrow; Bone Marrow Cells; Dermatitis, Contact; Epidermis; Female; Flow Cytometry; Haptens; Langerhans Cells; Male; Mice; Mice, Inbred CBA; Skin; Support, Non-U.S. Gov't; Support, U.S. Gov't, P.H.S.		Antigens, Surface; Antigens, Thy-1; Haptens												221767		JOIMA	2876041	English	J. IMMUNOL.	Article	Final		Scopus	2-s2.0-0023032287
Scheynius A., Klareskog L., Holmdahl R., Larsson P.	7007164175;7101784599;7103259084;7202584936;	Induction of Thy-1 antigen on murine keratinocytes	1986	Immunology	57	3		451	454		8		https://www.scopus.com/inward/record.uri?eid=2-s2.0-0022591611&partnerID=40&md5=a2170829cc08368f4796ab73b98f70af	The Institute of Clinical Bacteriology, Department of Medical and Physiological Chemistry, Biomedical Center, University of Uppsala, S-751 22 Uppsala, Sweden	Scheynius, A., The Institute of Clinical Bacteriology, Department of Medical and Physiological Chemistry, Biomedical Center, University of Uppsala, S-751 22 Uppsala, Sweden; Klareskog, L., The Institute of Clinical Bacteriology, Department of Medical and Physiological Chemistry, Biomedical Center, University of Uppsala, S-751 22 Uppsala, Sweden; Holmdahl, R., The Institute of Clinical Bacteriolog…	In normal murine epidermis Thy-1 antigen is known to be strongly expressed on a dendritic population of bone marrow derived cells lacking Ia antigens and faintly on keratinocytes. We now report on the induction of pronounced expression of Thy-1 antigen on keratinocytes by immunological stimuli as well as by chemical irritation and wounding. In contrast the induction of Ia antigens on keratinocyte…		Ia antigen; thy 1 antigen; animal cell; animal experiment; dendritic cell; epidermis; immune response; keratinocyte; mouse; nonhuman; priority journal; wound; Animal; Antigens, Surface; Antigens, Thy-1; Dermatitis, Contact; Dinitrofluorobenzene; Epidermis; Histocompatibility Antigens Class II; Immunoenzyme Techniques; Keratin; Mice; Mice, Inbred BALB C; Mice, Inbred DBA; Support, Non-U.S. Gov't		Antigens, Surface; Antigens, Thy-1; Dinitrofluorobenzene, 70-34-8; Histocompatibility Antigens Class II; Keratin, 68238-35-7												192805		IMMUA	2420703	English	IMMUNOLOGY	Article	Final		Scopus	2-s2.0-0022591611
Romani N., Schuler G., Fritsch P.	7006153713;7202657059;19334289700;	Ontogeny of Ia-positive and Thy-1-positive leukocytes of murine epidermis	1986	Journal of Investigative Dermatology	86	2		129	133		54	10.1111/1523-1747.ep12284135	https://www.scopus.com/inward/record.uri?eid=2-s2.0-0022577964&doi=10.1111%2f1523-1747.ep12284135&partnerID=40&md5=fe27f9fcbbcc5af9d23f5ac2371485df	Department of Dermatology, University of Innsbruck, Innsbruck, Austria; Department of Cellular Physiology and Immunology, The Rockefeller University, New York, NY, United States	Romani, N., Department of Dermatology, University of Innsbruck, Innsbruck, Austria; Schuler, G., Department of Cellular Physiology and Immunology, The Rockefeller University, New York, NY, United States; Fritsch, P., Department of Dermatology, University of Innsbruck, Innsbruck, Austria	Murine epidermis harbors 2 populations of dendritic leukocytes: Langerhans cells (LC) and Thy-l-positive dendritic epidermal cells (Thy-1+DEC). In the adult mouse these cell types are morphologically distinct and display highly characteristic phenotypes. LC bear Ia-antigens and a group of markers typical for mononuclear phagocytes: Fc- and C3bi-receptors, macrophage-specific antigen F4/80, and me…		animal cell; cytology; dendritic cell; endocrine system; epidermis; immunofluorescence; Langerhans cell; mouse; nonhuman; ontogeny; priority journal						Romani, N.; Department of Dermatology, University of Innsbruck, Innsbruck, Austria								0022202X		JIDEA	2875114	English	J. Invest. Dermatol.	Article	Final	Open Access	Scopus	2-s2.0-0022577964
Gu S.-Q., Sakuma M., Naito S., Baba T., Uyeno K.	57199703796;7102643951;55628574568;7402063585;7004630535;	Surface densities of murine Ia+ dendritic epidermal cells (Ia+DECs) and Thy-1+ dendritic epidermal cells (Thy-1+DECs) in relationship to aging and ultraviolet B (UVB) radiation	1986	Journal of Dermatology	13	6		433	439		3	10.1111/j.1346-8138.1986.tb02971.x	https://www.scopus.com/inward/record.uri?eid=2-s2.0-0022879270&doi=10.1111%2fj.1346-8138.1986.tb02971.x&partnerID=40&md5=d63f0c618cade34389e995f33a707395	Department of Dermatology, Institute of Clinical Medicine, University of Tsukuba, Niihari, Ibaraki 305, Japan	Gu, S.-Q., Department of Dermatology, Institute of Clinical Medicine, University of Tsukuba, Niihari, Ibaraki 305, Japan; Sakuma, M., Department of Dermatology, Institute of Clinical Medicine, University of Tsukuba, Niihari, Ibaraki 305, Japan; Naito, S., Department of Dermatology, Institute of Clinical Medicine, University of Tsukuba, Niihari, Ibaraki 305, Japan; Baba, T.; Uyeno, K.	Identification and enumeration of both Ia+ dendritic epidermal cells (Ia+DECs) and Thy-1+ dendritic epidermal cells (Thy-1+DECs) from various parts of the body and non-irradiated and ultraviolet B (UVB) irradiated back skin were examined using epidermal sheets of C3H/He inbred mice of different age groups and indirect immunofluorescent technique. The following results were obtained: There was a s…		age; aging; animal cell; cytology; dendritic cell; epidermis; immunofluorescence; mouse; nonhuman; ultraviolet B radiation														3852407		JDMYA	2881953	English	J. DERMATOL.	Article	Final		Scopus	2-s2.0-0022879270
Cohen R.L., Crawford J.M., Chambers D.A.	7404157401;7401850485;7202907273;	Thy-1+ epidermal cells are not demonstrable in rat and human skin	1986	Journal of Investigative Dermatology	87	1		30	32		9	10.1111/1523-1747.ep12523537	https://www.scopus.com/inward/record.uri?eid=2-s2.0-0022615054&doi=10.1111%2f1523-1747.ep12523537&partnerID=40&md5=f5e70af7599a326b934d35b9645c93c8	Center for Research in Periodontal Diseases and Oral Molecular Biology, University of Illinois at Chicago, Chicago, IL, United States; Department of Biochemistry, University of Illinois at Chicago, Chicago, IL, United States; Department of Dermatology, University of Illinois at Chicago, Chicago, IL, United States; Department of Oral Pathology, University of Illinois at Chicago, Chicago, IL, Unite…	Cohen, R.L., Center for Research in Periodontal Diseases and Oral Molecular Biology, University of Illinois at Chicago, Chicago, IL, United States, Department of Dermatology, University of Illinois at Chicago, Chicago, IL, United States, Department of Oral Pathology, University of Illinois at Chicago, Chicago, IL, United States; Crawford, J.M., Center for Research in Periodontal Diseases and Oral…	Recent studies have revealed the presence of a population of Thy-1+ epidermal cells in murine epidermis. These experiments were designed to determine whether analogous Thy-1+ cell populations occur in rat and human epidermis. Thy-1+ cells could not be demonstrated in epidermal sheets derived from rat and human skin or in epidermal cell lines, KB and A431. To date, Thy-1+ epidermal cells have been…		alloantigen; thy 1 antigen; animal cell; cytology; dendritic cell; epidermis; human; human cell; immunofluorescence; nonhuman; priority journal; rat; Adult; Animal; Antigens, Surface; Antigens, Thy-1; Epidermis; Female; Fluorescent Antibody Technique; Human; Male; Middle Age; Rabbits; Rats; Rats, Inbred Strains; Species Specificity; Support, U.S. Gov't, P.H.S.		Antigens, Surface; Antigens, Thy-1				Cohen, R.L.; Center for Research in Periodontal Diseases and Oral Molecular Biology, University of Illinois at Chicago, Chicago, IL, United States								0022202X		JIDEA	2873188	English	J. Invest. Dermatol.	Article	Final	Open Access	Scopus	2-s2.0-0022615054
Nixon-Fulton J.L., Bergstresser P.R., Tigelaar R.E.	6602411425;7007054829;7007168145;	Thy-1+ epidermal cells proliferate in response to Concanavalin A and interleukin 2	1986	Journal of Immunology	136	8		2776	2786		32		https://www.scopus.com/inward/record.uri?eid=2-s2.0-0022652065&partnerID=40&md5=4f377bf292460b9d9487dd5182c3a812	Department of Dermatology, University of Texas Health Science Center at Dallas, Dallas, TX 75235, United States	Nixon-Fulton, J.L., Department of Dermatology, University of Texas Health Science Center at Dallas, Dallas, TX 75235, United States; Bergstresser, P.R., Department of Dermatology, University of Texas Health Science Center at Dallas, Dallas, TX 75235, United States; Tigelaar, R.E., Department of Dermatology, University of Texas Health Science Center at Dallas, Dallas, TX 75235, United States	Mouse epidermal cells (EC) are composed of at least two phenotypically discrete populations of cells that in epidermal sheets have a dendritic morphology: Ia+ Langerhans cells (LC) and dendritic, bone marrow-derived, Ia- cells that express Thy-1 antigen (Thy-1+ dEC). Thy-1+ dEC lack other typical T cell markers such as L3T4, Lyt-1, and Lyt-2; however, they do express Ly-5 and asialo GM1 in common…		concanavalin a; indometacin; interleukin 2; thy antigen; cell proliferation; drug efficacy; epidermis cell; fluorescence activated cell sorter; in vitro study; mouse; nonhuman; priority journal; Animal; Antigens, Surface; Antigens, Thy-1; Cell Division; Cell Separation; Centrifugation, Density Gradient; Concanavalin A; Epidermis; Female; Interleukin-2; Mice; Mice, Inbred AKR; Mice, Inbred C3H; Mi…		concanavalin A, 11028-71-0; indometacin, 53-86-1, 74252-25-8, 7681-54-1; interleukin 2, 85898-30-2; Antigens, Surface; Antigens, Thy-1; Concanavalin A, 11028-71-0; Interleukin-2; Suspensions												221767		JOIMA	2870120	English	J. IMMUNOL.	Article	Final		Scopus	2-s2.0-0022652065
Bonyhadi M., Weiss A., Tucker P.W., Tigelaar R.E., Allison J.P.	6603714204;7402247675;7202804766;7007168145;7401475344;	Delta is the Cx-gene product in the γ/δ antigen receptor of dendritic epidermal cells	1987	Nature	330	6148		574	576		53	10.1038/330574a0	https://www.scopus.com/inward/record.uri?eid=2-s2.0-0023522308&doi=10.1038%2f330574a0&partnerID=40&md5=5d009b79dfa52f9bb0139b3796e821a1	Cancer Research Laboratory, Department of Microbiology and Immunology, University of California, Berkeley, CA 94720, United States; Howard Hughes Medical Institute, University of California, San Francisco, CA 94143, United States; Department of Microbiology, University of Texas, Southwestern Medical Center, Dallas, TX 75235, United States; Department of Dermatology, University of Texas, Southwest…	Bonyhadi, M., Cancer Research Laboratory, Department of Microbiology and Immunology, University of California, Berkeley, CA 94720, United States; Weiss, A., Howard Hughes Medical Institute, University of California, San Francisco, CA 94143, United States; Tucker, P.W., Department of Microbiology, University of Texas, Southwestern Medical Center, Dallas, TX 75235, United States; Tigelaar, R.E., De…	Most T cells bear an antigen receptor that is a protein of a disulphide-linked heterodimer composed of an a chain and a β chain associated with the non-polymorphic CD3 (T3) complex1-7. A small subpopulation of thymic and peripheral T cells8-17, as well as Thy-1 +dendritic epidermal cells (dEC) (refs 18-21), express an alternative CD3-associated dimeric receptor composed of the product of the T-ce…		lymphocyte antigen receptor; oligosaccharide; lymphocyte antigen receptor; Receptors, Antigen, T Cell; blood and hemopoietic system; editorial; epidermis cell; human; human cell; lymphatic system; lymphoma; methodology; t lymphocyte; thymus; amino acid sequence; animal; article; cell line; epidermis; genetics; immunology; macromolecule; molecular genetics; mouse; structural gene; T lymphocyte; Am…		Macromolecular Systems; Receptors, Antigen, T-Cell			Allison, J.P., McIntyre, B.W., Bloch, D., (1982) J. Immun, 129, pp. 2293-2300; Haskins, K., (1983) J. Exp. Med, 157, pp. 1149-1169; Meuer, S., (1983) J. Exp. Med, 157, pp. 705-719; Borst, J., Aleunder, S., Elder, J., Terhorst, C., (1983) J. Biol. Chem, 258, pp. 5135-5143; Allison, J.P., Lanier, L.L., (1985) Nature, 314, pp. 107-108; Samuelson, L.E., Harford, J.B., Klausner, R.D., (1985) Cell, 43,…	Bonyhadi, M.; Cancer Research Laboratory, Department of Microbiology and Immunology, University of California, Berkeley, CA 94720, United States								280836			3500417	English		Article	Final		Scopus	2-s2.0-0023522308
ORITA M.	36955153100;	Effects of ultraviolet irradiation on surface marker expression by epidermal immunocompetent cells and contact sensitization to dinitrofluorobenzene in mice	1987	British Journal of Dermatology	117	6		721	733		10	10.1111/j.1365-2133.1987.tb07352.x	https://www.scopus.com/inward/record.uri?eid=2-s2.0-0023585023&doi=10.1111%2fj.1365-2133.1987.tb07352.x&partnerID=40&md5=0ff4c42d1291267a0bffe3016e4ccefd	Department of Dermatology, School of Medicine, Tokyo Medical and Denial University, 1‐5‐45, Yushima, Bunkyo‐Ku, Tokyo, 113, Japan	ORITA, M., Department of Dermatology, School of Medicine, Tokyo Medical and Denial University, 1‐5‐45, Yushima, Bunkyo‐Ku, Tokyo, 113, Japan	We studied the effects of ultraviolet (UV) irradiation on murine epidermal Ia‐positive Langerhans cells (Ia + LC) and Thy‐I‐positive dendritic epidermal cells (Thy‐I + dEC). We also studied contact hypersensitivity to dinitrofluorobenzene (DNFB) introduced through UV‐treated epidermis. C3H/HeN mice were exposed to UVB or 8‐methoxypsoralen plus UVA (PUVA). UVB and PUVA treatment led to a dramatic …		1 fluoro 2,4 dinitrobenzene; thy 1 antigen; animal cell; animal experiment; contact allergy; dendritic cell; epidermis; histochemistry; langerhans cell; mouse; nonhuman; priority journal; ultrastructure; ultraviolet radiation; Animal; Dermatitis, Contact; Dinitrofluorobenzene; Epidermis; Female; Histocompatibility Antigens Class II; Immunocompetence; Langerhans Cells; Mice; Mice, Inbred Strains; …		1 fluoro 2,4 dinitrobenzene, 25376-51-6, 70-34-8; Dinitrofluorobenzene, 70-34-8; Histocompatibility Antigens Class II			Lugar, TA, Stalder, BM, Katz, SI, Oppenheim, JJ., Epidermal cell (keratinocyte)‐derived thymocyte‐activating factor (ETAF) (1981) J Immunol, 127, pp. 1493-1498; Sauder, DN, Carter, D, Katz, SI, Oppenheim, JJ., Epidermal cell production of thymocyte activating factor (1982) J Invest Dermatol, 79, pp. 34-39; Stingl, G, Tamaki, K, Katz, SI., Origin and function of epidermal Langerhans cells (1980) I…	ORITA, M.; Department of Dermatology, School of Medicine, Tokyo Medical and Denial University, 1‐5‐45, Yushima, Bunkyo‐Ku, Tokyo, 113, Japan								70963			3480755	English	Br. J. Dermatol.	Article	Final		Scopus	2-s2.0-0023585023
Koning F., Stingl G., Yokoyama W.M., Yamada H., Lee Maloy W., Tschachler E., Shevach E.M., Coligan J.E.	26643588500;7102655442;7004807380;55741872200;6508251552;56273310700;7102804155;7101937287;	Identification of a T3-associated γδ T cell receptor on thy-1+ dendritic epidermal cell lines	1987	Science	236	4803		834	837		168	10.1126/science.2883729	https://www.scopus.com/inward/record.uri?eid=2-s2.0-0023235381&doi=10.1126%2fscience.2883729&partnerID=40&md5=640555ba6bf1c77cb8c910472fc60899	Laboratory of Immunogenetics, National Institute of Allergy and Infectious Diseases, Bethesda, MD 20892, United States; University of Vienna, Medical School, Vienna, Austria; Laboratory of Immunology, National Institute of Allergy and Infectious Diseases, Bethesda, MD 20892, United States	Koning, F., Laboratory of Immunogenetics, National Institute of Allergy and Infectious Diseases, Bethesda, MD 20892, United States; Stingl, G., University of Vienna, Medical School, Vienna, Austria; Yokoyama, W.M., Laboratory of Immunology, National Institute of Allergy and Infectious Diseases, Bethesda, MD 20892, United States; Yamada, H., University of Vienna, Medical School, Vienna, Austria; L…	The murine epidermis contains a subpopulation of bone marrow-derived lymphocytes that have a dendritic morphology and that express Thy-1 and T3 cell-surface antigens but not other markers (L3T4 or Lyt-2) characteristic of mature peripheral T lymphocytes. An alternative type of T cell receptor was earlier identified on a subpopulation of murine thymocytes with a similar phenotype (T3+, L3T4-, Lyt-…		membrane antigen; t lymphocyte receptor; dendritic cell; epidermis cell; mouse; nonhuman; priority journal; t lymphocyte; Animals; Antigens, Surface; Antigens, Thy-1; Bone Marrow; Cell Line; Mice; Molecular Weight; Receptors, Antigen, T-Cell; T-Lymphocytes; Murinae		Antigens, Surface; Antigens, Thy-1; Receptors, Antigen, T-Cell			Tschachler, E., (1983) J. Invest. Dermatol., 81, p. 282; Romani, N., (1985) J. Exp. Med., 161, p. 1368; Stingi, G., Proc. Natl. Acad. Sci. U.S.A., , in press; Stingi, G., Proc. Nati. Acad. Sci. USA., , in press; Samelson, L.E., (1986) J. Immunol., 137, p. 3254; Lew, A.M., (1986) Science, 234, p. 1401; Bluestone, J.A., Pardoll, D.M., Sharrow, S.O., Fowlkes, B.J., (1987) Nature (London), 326, p. 82…	Koning, F.; Laboratory of Immunogenetics, National Institute of Allergy and Infectious Diseases, Bethesda, MD 20892, United States								368075			2883729	English		Article	Final		Scopus	2-s2.0-0023235381
Nixon-Fulton J.L., Witte P.L., Tigelaar R.E., Bergstresser P.R., Kumar V.	6602411425;7005036667;7007168145;7007054829;7404634888;	Lack of dendritic Thy-1+ epidermal cells in mice with severe combined immunodeficiency disease	1987	Journal of Immunology	138	9		2902	2905		11		https://www.scopus.com/inward/record.uri?eid=2-s2.0-0023186698&partnerID=40&md5=75b51f23c5b0da353c59324c3892a3d5	Department of Dermatology, University of Texas Health Science Center, Dallas, TX 75235, United States	Nixon-Fulton, J.L., Department of Dermatology, University of Texas Health Science Center, Dallas, TX 75235, United States; Witte, P.L., Department of Dermatology, University of Texas Health Science Center, Dallas, TX 75235, United States; Tigelaar, R.E., Department of Dermatology, University of Texas Health Science Center, Dallas, TX 75235, United States; Bergstresser, P.R.; Kumar, V.	C.B-17 scid (severe combined immunodeficiency disease) mice were used to evaluate the relationship of dendritic Thy-1+ epidermal cells (EC) to T lymphocytes (deficient in scid) and to NK cells (replete in scid). Epidermis from scid mice was deficient in dendritic Thy-1+ cells as determined by immunofluorescent staining of epidermal whole mounts. Similarly, epidermal cell suspensions from scid mic…		natural killer cell; priority journal; t lymphocyte; Animals; Antigens, Surface; Antigens, Thy-1; Bone Marrow Transplantation; Cell Differentiation; Concanavalin A; Dendritic Cells; Epidermis; Immunologic Deficiency Syndromes; Lymphocyte Activation; Mice; Mice, Mutant Strains; T-Lymphocytes		Antigens, Surface; Antigens, Thy-1; Concanavalin A, 11028-71-0												221767		JOIMA	2883236	English	J. IMMUNOL.	Article	Final		Scopus	2-s2.0-0023186698
Giorno R., Lee Choi K., Katz H.R., Claman H.N.	7003311564;6504235449;7201970634;7005830148;	Monoclonal antibody analysis of skin in chronic murine graft vs host disease produced across minor histocompatibility barriers	1987	Cellular Immunology	106	1		76	87		5	10.1016/0008-8749(87)90151-1	https://www.scopus.com/inward/record.uri?eid=2-s2.0-0023183259&doi=10.1016%2f0008-8749%2887%2990151-1&partnerID=40&md5=e8803676147cfcf9f8929fc057b8fb62	Division of Allergy and Clinical Immunology, Department of Medicine, University of Colorado Health Sciences Center, Container B-164, Denver, CO 80262, United States; Department of Medicine, Harvard Medical School, Boston, MA 02115, United States; The Department of Rheumatology and Immunology, Brigham and Womens Hospital, Boston, MA 02115, United States	Giorno, R.; Lee Choi, K.; Katz, H.R., Division of Allergy and Clinical Immunology, Department of Medicine, University of Colorado Health Sciences Center, Container B-164, Denver, CO 80262, United States, Department of Medicine, Harvard Medical School, Boston, MA 02115, United States, The Department of Rheumatology and Immunology, Brigham and Womens Hospital, Boston, MA 02115, United States; Clama…	Chronic graft vs host disease (GVHD) across minor histocompatibility barriers was produced in BALB/c mice by the injection of spleen cells from B10.D2 mice. Changes in the skin were analyzed in frozen sections using a panel of monoclonal antibodies detected by immunoperoxidase methods. Compared to control animals, a number of changes occurred in the skin of animals with chronic GVHD. In the epide…		monoclonal antibody; animal model; blood and hemopoietic system; cytology; frozen section; graft versus host reaction; inflammatory infiltrate; minor histocompatibility complex; mouse; nonhuman; priority journal; skin; t lymphocyte subpopulation; Animal; Antibodies, Monoclonal; Female; Graft vs Host Disease; Histocompatibility; Histocompatibility Antigens Class II; Mice; Mice, Inbred BALB C; Skin…		Antibodies, Monoclonal; Histocompatibility Antigens Class II			Jaffee, Claman, (1983) Cell. Immunol, 77, p. 1; Holda, Maier, Claman, (1985) Immunol. Rev, 88, p. 87; Giorno, (1984) Surv. Synth. Pathol. Res, 3, p. 165; Katz, LeBlanc, Russell, (1983) Proc. Natl. Acad. Sci. USA, 80, p. 5916; LeBlanc, Russell, Chang, (1982) J. Reticuloendothel. Soc, 32, p. 219; Ho, Springer, (1982) J. Immunol, 128, p. 2281; Ledbetter, Rouse, Micklem, Herzenberg, (1980) J. Exp. Me…									88749		CLIMB	3552256	English	Cell. Immunol.	Article	Final		Scopus	2-s2.0-0023183259
Picut C.A., Lee C.S., Dougherty E.P.	6602977802;57196253591;7102873821;	Purification and identification of murine epidermal dendritic cells: Flow cytometry and immunogold labeling	1987	Journal of Histochemistry and Cytochemistry	35	7 (745					14		https://www.scopus.com/inward/record.uri?eid=2-s2.0-0023372924&partnerID=40&md5=f91691265066b6ec78cde88c0eeaed7b	Department of Pathology, New York State College of Veterinary Medicine, Cornell University, Ithaca, NY, United States	Picut, C.A., Department of Pathology, New York State College of Veterinary Medicine, Cornell University, Ithaca, NY, United States; Lee, C.S., Department of Pathology, New York State College of Veterinary Medicine, Cornell University, Ithaca, NY, United States; Dougherty, E.P., Department of Pathology, New York State College of Veterinary Medicine, Cornell University, Ithaca, NY, United States	[No abstract available]		priority journal; animal; article; cell separation; cytochemistry; cytology; dendrite; electron microscopy; epidermis; female; flow cytometry; immunological procedures; immunology; Langerhans cell; mouse; mouse strain; ultrastructure; Murinae; Antigens, Thy 1; HLA antigen class 2; membrane antigen; Thy 1 antigen; Animal; Antigens, Surface; Antigens, Thy-1; Cell Separation; Dendrites; Epidermis; F…		Antigens, Surface; Antigens, Thy-1; Histocompatibility Antigens Class II												221554		JHCYA	2884251	English	J. HISTOCHEM. CYTOCHEM.	Article	Final		Scopus	2-s2.0-0023372924
Rheins L.A., Young E.M., Nordlund M.L., Berning R.B., Nordlund J.J.	6603963559;56344057100;57197571332;6604073562;7005882211;	Rapid induction of Thy-1 antigenic markers on keratinocytes and epidermal immune cells in the skin of mice following topical treatment with common preservatives used in topical medications and in foods	1987	Journal of Investigative Dermatology	89	5		489	494		16	10.1111/1523-1747.ep12460968	https://www.scopus.com/inward/record.uri?eid=2-s2.0-0023232242&doi=10.1111%2f1523-1747.ep12460968&partnerID=40&md5=9138dc8fe8351cbeda06a501de7c5fe1	Department of Dermatology, University of Cincinnati College of Medicine, Cincinnati, OH, United States	Rheins, L.A., Department of Dermatology, University of Cincinnati College of Medicine, Cincinnati, OH, United States; Young, E.M., Department of Dermatology, University of Cincinnati College of Medicine, Cincinnati, OH, United States; Nordlund, M.L., Department of Dermatology, University of Cincinnati College of Medicine, Cincinnati, OH, United States; Berning, R.B., Department of Dermatology, Un…	Earlier experiments from our laboratory revealed that the medication most commonly used for depigmenting patients with vitiligo, monobenzyl ether of hydroquinone (MBEH), when applied to the skin of DBA/2 mice caused an increase in the population density (cells/mm2) of identifiable Ia+ and ATPase+ Langerhans cells. Further, this increase in Langerhans cell density could be correlated with an incre…		butylated hydroxyanisole; butylcresol; thy 1 antigen; animal experiment; contact allergy; cytology; dendritic cell; epidermis; histology; keratinocyte; mouse; nonhuman; Administration, Topical; Animal; Antigens, Surface; Antigens, Thy-1; Antioxidants; Cell Division; Comparative Study; Dendritic Cells; Dermatitis, Contact; Epidermis; Food Preservatives; Gene Expression Regulation; Histocompatibili…		butylated hydroxyanisole, 25013-16-5; butylcresol, 128-37-0, 30587-81-6; Antigens, Surface; Antigens, Thy-1; Antioxidants; Food Preservatives; Histocompatibility Antigens Class II; Virulence Factors, Bordetella				Rheins, L.A.; Department of Dermatology, University of Cincinnati College of Medicine, Cincinnati, OH, United States								0022202X		JIDEA	2889782	English	J. Invest. Dermatol.	Article	Final	Open Access	Scopus	2-s2.0-0023232242
Bigby M., Kwan T., Sy M.-S.	7005216003;7102387998;7103203706;	Ratio of Langerhans cells to Thy-1+ dendritic epidermal cells in murine epidermis influences the intensity of contact hypersensitivity	1987	Journal of Investigative Dermatology	89	5		495	499		34	10.1111/1523-1747.ep12460983	https://www.scopus.com/inward/record.uri?eid=2-s2.0-0023232243&doi=10.1111%2f1523-1747.ep12460983&partnerID=40&md5=422c7985302bbe36e15bbda26d47aa47	Department of Pathology, Harvard Medical School, Boston, MA, United States; Department of Pathology, Beth Israel Hospital, Charles A. Dana Research Institute, Boston, MA, United States	Bigby, M., Department of Pathology, Harvard Medical School, Boston, MA, United States; Kwan, T., Department of Pathology, Beth Israel Hospital, Charles A. Dana Research Institute, Boston, MA, United States; Sy, M.-S., Department of Pathology, Harvard Medical School, Boston, MA, United States	We have initiated a series of studies in vivo to investigate the physiologic role of Langerhans cells and Thy-1+ dendritic epidermal cells in the development and regulation of contact hypersensitivity. The density of I-A+ Langerhans cells and Thy-1+ dendritic epidermal cells in ammonium thiocyanate-separated epidermal sheets was determined in ten strains of inbred mice using immunofluorescence mi…		oxazolone; thy 1 antigen; animal cell; animal experiment; chlorotrinitrobenzene; contact allergy; dendritic cell; endocrine system; epidermis; immunofluorescence; langerhans cell; mouse; nonhuman; Animal; Antigens, Surface; Antigens, Thy-1; Cell Count; Comparative Study; Dendritic Cells; Dermatitis, Contact; Epidermis; Female; Histocompatibility Antigens Class II; Langerhans Cells; Male; Mice; Mi…		Antigens, Surface; Antigens, Thy-1; Histocompatibility Antigens Class II				Bigby, M.; Department of Pathology, Harvard Medical School, Boston, MA, United States								0022202X		JIDEA	2889783	English	J. Invest. Dermatol.	Article	Final	Open Access	Scopus	2-s2.0-0023232243
Howells G.L., Williams D.M.	35570158500;7406554123;	The sequential demonstration of non-specific esterase reactivity IA antigen and Thy-1 antigen in murine epidermal sheets	1987	Archives of Oral Biology	32	9		679	683		2	10.1016/0003-9969(87)90045-8	https://www.scopus.com/inward/record.uri?eid=2-s2.0-0023502843&doi=10.1016%2f0003-9969%2887%2990045-8&partnerID=40&md5=6fc02a85cd025ecd1d9440432cb1a5b8	Department of Oral Pathology, The London Hospital Medical College, London E.1, England, United Kingdom	Howells, G.L., Department of Oral Pathology, The London Hospital Medical College, London E.1, England, United Kingdom; Williams, D.M., Department of Oral Pathology, The London Hospital Medical College, London E.1, England, United Kingdom	Immunofluorescence demonstrating Ia and Thy-1 antigens and non-specific esterase (NSE) enzyme histochemistry were performed sequentially on sheets of ear epidermis from CBA, C3H.OH, A J, and Balb c mice. The same areas of epidermis were photographed after each reaction and individual cells identified and compared. Thy-1+ dendritic cells expressed neither Ia antigen nor NSE reactivity. No cell was…		Antigens, Thy 1; carboxylesterase; HLA antigen class 2; membrane antigen; Thy 1 antigen; animal; article; cytology; enzymology; epidermis; fluorescent antibody technique; Langerhans cell; male; metabolism; mouse; mouse strain; Animal; Antigens, Surface; Antigens, Thy-1; Carboxylic Ester Hydrolases; Epidermis; Fluorescent Antibody Technique; Histocompatibility Antigens Class II; Langerhans Cells; …		carboxylesterase, 59536-71-9, 83380-83-0, 9016-18-6, 9028-01-7; Antigens, Surface; Antigens, Thy-1; carboxylesterase, EC 3.1.1.1; Carboxylic Ester Hydrolases, EC 3.1.1; Histocompatibility Antigens Class II			Bergstresser, Tigelaar, Dees, Streilein, Thy-1 antigen bearing dendritic cells populate marine epidermis (1983) J. invest. Derm., 81, pp. 286-288; Cohen, Crawford, Chambers, Thy-1+ epidermal cells are not demonstrable in rat and human skin (1986) J. invest. Derm., 87, pp. 30-32; Katz, Tamaki, Sachs, Epidermal Langerhans cells are derived from cells originating in bone marrow (1979) Nature, 282, p…	Howells, G.L.; Department of Oral Pathology, The London Hospital Medical College, London E.1, England, United Kingdom								39969		AOBIA	2895629	English	Arch. Oral Biol.	Article	Final		Scopus	2-s2.0-0023502843
Stingl G., Gunter K.C., Tschachler E., Yamada H., Lechler R.I., Yokoyama W.M., Steiner G., Germain R.N., Shevach E.M.	7102655442;7006674796;56273310700;55741872200;7103135937;7004807380;7201592455;16688603600;7102804155;	Thy-1+ dendritic epidermal cells belong to the T-cell lineage	1987	Proceedings of the National Academy of Sciences of the United States of America	84	8		2430	2434		79	10.1073/pnas.84.8.2430	https://www.scopus.com/inward/record.uri?eid=2-s2.0-0023268923&doi=10.1073%2fpnas.84.8.2430&partnerID=40&md5=321ef4e8fb9f9a3953f6a1e739eb3069	Laboratory of Immunology, National Institute of Allergy and Infectious Diseases, National Institutes of Health, Bethesda, MD 20892, United States	Stingl, G., Laboratory of Immunology, National Institute of Allergy and Infectious Diseases, National Institutes of Health, Bethesda, MD 20892, United States; Gunter, K.C., Laboratory of Immunology, National Institute of Allergy and Infectious Diseases, National Institutes of Health, Bethesda, MD 20892, United States; Tschachler, E., Laboratory of Immunology, National Institute of Allergy and Inf…	The murine epidermis contains a population of dendritic, Thy-1+ cells (Thy-1+ DEC). Although it is now clear that these cells are of bone marrow origin, extensive morphological, histochemical, and cell-membrane marker studies have not definitively placed them in any known hematopoietic differentiation pathway. Based on the observation that Thy-1+ DEC can be propagated in vitro with Con A and inte…		thy 1 antigen; animal cell; dendritic cell; epidermis; genetic engineering; mouse; nonhuman; priority journal; southern blotting; t lymphocyte; t lymphocyte receptor gene; Animals; Antigens, Surface; Antigens, Thy-1; Cell Line; Dendritic Cells; Epidermis; Genes; Mice; Mice, Inbred C3H; Nucleic Acid Hybridization; Phenotype; Receptors, Antigen, T-Cell; T-Lymphocytes; Transcription, Genetic		Antigens, Surface; Antigens, Thy-1; Receptors, Antigen, T-Cell												278424		PNASA	2882517	English	PROC. NATL. ACAD. SCI. U. S. A.	Article	Final	Open Access	Scopus	2-s2.0-0023268923
Stingl G., Koning F., Yamada H., Yokoyama W.M., Tschachler E., Bluestone J.A., Steiner G., Samelson L.E., Lew A.M., Coligan J.E.	7102655442;26643588500;55741872200;7004807380;56273310700;7102428768;7201592455;7004518812;26643380000;7101937287;	Thy-1+ dendritic epidermal cells express T3 antigen and the T-cell receptor gamma chain.	1987	Proceedings of the National Academy of Sciences of the United States of America	84	13		4586	4590		109	10.1073/pnas.84.13.4586	https://www.scopus.com/inward/record.uri?eid=2-s2.0-0023371478&doi=10.1073%2fpnas.84.13.4586&partnerID=40&md5=67ed728aeadf6175a5ce79c7012823c6		Stingl, G.; Koning, F.; Yamada, H.; Yokoyama, W.M.; Tschachler, E.; Bluestone, J.A.; Steiner, G.; Samelson, L.E.; Lew, A.M.; Coligan, J.E.	The murine epidermis is a heterogeneous epithelium composed of keratinocytes, melanocytes, Langerhans cells, and a recently described subpopulation (2-3%) of bone-marrow-derived leukocytes with a dendritic morphology and the cell surface phenotype Thy-1+, L3T4-, Lyt-2-. Previous studies have demonstrated that cell lines derived from freshly explanted Thy-1+ dendritic epidermal cells (DEC) have ab…		lymphocyte antigen receptor; membrane antigen; messenger RNA; peptide fragment; T lymphocyte antigen; Thy 1 antigen; animal; article; C3H mouse; cell line; classification; cytology; dendritic cell; epidermis; genetics; immunology; lymphocyte; mouse; phenotype; Animals; Antigens, Differentiation, T-Lymphocyte; Antigens, Surface; Antigens, Thy-1; Cell Line; Dendritic Cells; Epidermis; Lymphocytes; …		Antigens, Differentiation, T-Lymphocyte; Antigens, Surface; Antigens, Thy-1; Peptide Fragments; Receptors, Antigen, T-Cell; Receptors, Antigen, T-Cell, gamma-delta; RNA, Messenger				Stingl, G.								278424			2885839	English	Proc. Natl. Acad. Sci. U.S.A.	Article	Final	Open Access	Scopus	2-s2.0-0023371478
Cohen R.L., Alves M.E.A.F., Ostrega M.S., Belcaster G., Chambers D.A.	7404157401;7202824249;6505580022;24424958100;7202907273;	Topographic distribution of Thy-1 positive cells in epithelial tissues of BALB/c mice	1987	Archives of Oral Biology	32	1		11	15		1	10.1016/0003-9969(87)90147-6	https://www.scopus.com/inward/record.uri?eid=2-s2.0-0023082738&doi=10.1016%2f0003-9969%2887%2990147-6&partnerID=40&md5=1a53e369bd832e4d774b84b3ca0d337f	Center for Research in Periodontal Diseases and Oral Molecular Biology, University of Illinois at Chicago, 801 S. Paulina, Chicago, IL 60612, United States; Department of Biochemistry, University of Illinois at Chicago, 801 S. Paulina, Chicago, IL 60612, United States; Department of Dermatology, University of Illinois at Chicago, 801 S. Paulina, Chicago, IL 60612, United States; Department of Ora…	Cohen, R.L., Center for Research in Periodontal Diseases and Oral Molecular Biology, University of Illinois at Chicago, 801 S. Paulina, Chicago, IL 60612, United States, Department of Dermatology, University of Illinois at Chicago, 801 S. Paulina, Chicago, IL 60612, United States, Department of Oral Pathology, University of Illinois at Chicago, 801 S. Paulina, Chicago, IL 60612, United States; Al…	Epithelial sheets prepared from murine oral epithelia (palate, lining mucosa, gingiva) and oesophagus contained dendritic and round Thy-1 positive (+) cells similar to those observed in epidermis by immunofluorescence microscopy. Bladder, intestine and tracheal epithelium did not contain such cells. Thus, cells bearing the cells-surface glycoprotein Thy-1, like 1a-antigen-bearing Langerhans cells…		Antigens, Thy 1; membrane antigen; Thy 1 antigen; animal; article; cytology; epithelium; epithelium cell; esophagus; fluorescence microscopy; fluorescent antibody technique; male; metabolism; mouse; mouse strain; mouth mucosa; skin; small intestine; Animal; Antigens, Surface; Antigens, Thy-1; Epithelial Cells; Epithelium; Esophagus; Fluorescent Antibody Technique; Intestine, Small; Male; Mice; Mi…		Antigens, Surface; Antigens, Thy-1			Bergstresser, Tigelaar, Dees, Streilein, Thy-1 antigen bearing dendritic cells populate murine epidermis (1983) J. invest. Derm., 81, pp. 286-288; Chambers, The Thy-1 epidermal cell perspective and prospective (1986) British Journal of Dermatology, 113, pp. 24-33; Chambers, Cohen, Heiss, Alves, Heterogeneity of epidermal cells detected by expression of differentiation antigens in normal and nude …	Cohen, R.L.; Center for Research in Periodontal Diseases and Oral Molecular Biology, University of Illinois at Chicago, 801 S. Paulina, Chicago, IL 60612, United States								39969		AOBIA	2890339	English	Arch. Oral Biol.	Article	Final		Scopus	2-s2.0-0023082738
Steiner G., Koning F., Elbe A., Tschachler E., Yokoyama W.M., Shevach E.M., And G.S., Coligan J.E.	7201592455;26643588500;7003877845;56273310700;7004807380;7102804155;57192358638;7101937287;	Characterization of T cell receptors on resident murine dendritic epidermal T cells	1988	European Journal of Immunology	18	9		1323	1328		35	10.1002/eji.1830180904	https://www.scopus.com/inward/record.uri?eid=2-s2.0-0023802825&doi=10.1002%2feji.1830180904&partnerID=40&md5=7fb9ea7378f4448f5e769a19169f720f	Department of Dermatology I, Division of Cutaneous; University of Vienna Medical School, 3iological Resources Branch, Vienna, Austria; Laboratory of Immunology; National Institute of Allergy and Infectious Diseases, National Institutes of Health, Bethesda, United States; National Cancer Institute, Laboratory of Tumor Cell Biology, Building 37, Room 6A09, Bethesda, Maryland, 20892, United States	Steiner, G., Department of Dermatology I, Division of Cutaneous, National Institute of Allergy and Infectious Diseases, National Institutes of Health, Bethesda, United States; Koning, F., University of Vienna Medical School, 3iological Resources Branch, Vienna, Austria, National Institute of Allergy and Infectious Diseases, National Institutes of Health, Bethesda, United States; Elbe, A., Departm…	Cell lines derived from Thy‐1 dendritic epidermal cells (Thy‐1DEC) display a marked heterogeneity in T cell receptor (TcR) expression including CD3‐associated α/β, Cγ2/δ or Cγ2/δ and Cγ4/δ TcR. In order to investigate whether this heterogeneity is primarily imposed by in vitro culture conditions or, alternatively, is already present within the epidermis, we studied TcR expression by Thy‐1 DEC in …		cd3 antigen; interleukin 2 receptor; t lymphocyte receptor; thy 1 antigen; animal cell; animal experiment; cell culture; dendritic cell; epidermis cell; mouse; nonhuman; priority journal; Animal; Antigens, CD3; Antigens, CD45; Antigens, Differentiation; Antigens, Differentiation, T-Lymphocyte; Antigens, Surface; Antigens, Thy-1; Dendritic Cells; Epidermis; Fluorescent Antibody Technique; Histocom…		Antigens, CD3; Antigens, CD45; Antigens, Differentiation; Antigens, Differentiation, T-Lymphocyte; Antigens, Surface; Antigens, Thy-1; Histocompatibility Antigens; Receptors, Antigen, T-Cell; Receptors, Antigen, T-Cell, alpha-beta; Receptors, Antigen, T-Cell, gamma-delta			Tschachler, E., Schuler, G., Hutterer, J., Leibl, H., Wolff, K., Stingl, G., (1983) J Invest. Dermatol., 81, p. 282; Bergstresser, P.R., Tigelaar, R.E., Dees, J.H., Streilein, J.W., (1983) J. Invest. Dermatol., 81, p. 286; Romani, N., Stingl, G., Tschachler, E., Witmer, M.D., Steinman, R.M., Shevach, E.M., Schuler, G., (1985) J. Exp. Med., 161, p. 1368; Stingl, G., Koning, F., Yamada, H., Yokoyam…	And, G.S.; Department of Dermatology I, Division of Cutaneous Immunobiology, University of Vienna Medical School, Alser Str. 4, Vienna, A-1090, Austria								142980			2901962	English	Eur. J. Immunol.	Article	Final		Scopus	2-s2.0-0023802825
Havran W.L., Allison J.P.	7004541279;7401475344;	Developmentally ordered appearance of thymocytes expressing different T-cell antigen receptors	1988	Nature	335	6189		443	445		392	10.1038/335443a0	https://www.scopus.com/inward/record.uri?eid=2-s2.0-0023690608&doi=10.1038%2f335443a0&partnerID=40&md5=e7f5119e561861e086982789eb3fcf89	Cancer Research Laboratory, University of California, Berkeley, CA 94720, United States	Havran, W.L., Cancer Research Laboratory, University of California, Berkeley, CA 94720, United States; Allison, J.P., Cancer Research Laboratory, University of California, Berkeley, CA 94720, United States	The T-cell repertoire is elaborated by a still poorly understood process during which precursor cells arising in the bone marrow seed the thymus to provide a starting point for intrathymic differentiation and selection. The products of the process are cells which express antigen receptors composed of either α/β or γ/δ heterodimers in association with CD3 (refs 1-3). The finding that the appearanc…		t lymphocyte antigen; t lymphocyte receptor; animal cell; lymphocyte differentiation; mouse; nonhuman; priority journal; thymocyte; Animal; Antibodies, Monoclonal; Epitopes; Flow Cytometry; Gestational Age; Mice; Mice, Inbred BALB C; Receptors, Antigen, T-Cell; Support, U.S. Gov't, P.H.S.; T-Lymphocytes; Thymus Gland		Antibodies, Monoclonal; Epitopes; Receptors, Antigen, T-Cell			Allison, J.P., Lanier, L.L., (1987) A. Rev. Immun, 5, pp. 503-540; Allison, J.P., Lanier, L.L., (1987) Immun. Today, 8, pp. 293-296; Lew, A.M., (1986) Science, 234, pp. 1401-1405; Snodgrass, H.R., Dembic, Z., Steinmetz, M., von Boehmer, H., (1985) Nature, 315, pp. 232-233; Raulet, D.H., Garman, R.D., Saito, H., Tonegawa, S., (1985) Nature, 314, pp. 103-107; Born, W., Rathbun, G., Tucker, P., Marr…	Havran, W.L.; Cancer Research Laboratory, University of California, Berkeley, CA 94720, United States								280836			2458531	English		Article	Final		Scopus	2-s2.0-0023690608
TIGELAAR R., NIXON‐FULTON J., TAKASHIMA A., KUZIEL W., TAKIJIRI C., LEWIS J., TUCKER P., BERGSTRESSER P.	7007168145;6602411425;7103299656;7006422901;57191388031;55483972600;7202804766;7007054829;	Effect of Keratinocyte Cytokines on Thy‐1+ Dendritic Epidermal Cells	1988	Annals of the New York Academy of Sciences	548	1		271	282		2	10.1111/j.1749-6632.1988.tb18815.x	https://www.scopus.com/inward/record.uri?eid=2-s2.0-0024200842&doi=10.1111%2fj.1749-6632.1988.tb18815.x&partnerID=40&md5=f684632f82b341958a467c939e3ef731	University of Texas Southwestern Medical Center, Departments of Dermatology and Microbiology, 5323 Harry Hines Boulevard, Dallas, Texas, 75235, United States	TIGELAAR, R., University of Texas Southwestern Medical Center, Departments of Dermatology and Microbiology, 5323 Harry Hines Boulevard, Dallas, Texas, 75235, United States; NIXON‐FULTON, J., University of Texas Southwestern Medical Center, Departments of Dermatology and Microbiology, 5323 Harry Hines Boulevard, Dallas, Texas, 75235, United States; TAKASHIMA, A., University of Texas Southwestern M…	[No abstract available]		Antigens, Thy 1; biological factor; cytokine; immunoglobulin receptor; keratin; membrane antigen; mitogenic agent; Thy 1 antigen; animal; classification; cytology; dendritic cell; embryology; epidermis; human; immunology; metabolism; mouse; mouse strain; nude mouse; physiology; review; T lymphocyte; thymus; Animal; Antigens, Surface; Antigens, Thy-1; Biological Factors; Cytokines; Dendritic Cells…		Antigens, Surface; Antigens, Thy-1; Biological Factors; Cytokines; Keratin, 68238-35-7; Mitogens; Receptors, Immunologic			Bergstresser, P., Tigelaar, R., Dees, J., Streilein, J., (1983) J. Invest. Dermatol., 81, pp. 286-288; Tschachler, E., Schuler, G., Hatterer, J., Leibl, H., Wolff, K., Stingl, G., (1983) J. Invest. Dermatol., 81, pp. 282-285; Bergstresser, P., Tigelaak, R., Streilein, J., (1983) J. Invest. Dermatol., 83, pp. 83-87; Breathnach, S., Katz, S., (1984) J. Invest. Dermatol., 83, pp. 74-77; Romani], N.,…	TIGELAAR, R.; University of Texas Southwestern Medical Center, Departments of Dermatology and Microbiology, 5323 Harry Hines Boulevard, Dallas, Texas, 75235, United States								778923			2470301	English	Ann. New York Acad. Sci.	Article	Final		Scopus	2-s2.0-0024200842
Koning F., Yokoyama W.M., Maloy W.L., Stingl G., McConnell T.J., Cohen D.I., Shevach E.M., Coligan J.E.	26643588500;7004807380;7005160379;7102655442;7006916511;57209803347;7102804155;7101937287;	Expression of Cγ4 T cell receptors and lack of isotype exclusion by dendritic epidermal T cell lines	1988	Journal of Immunology	141	6		2057	2062		20		https://www.scopus.com/inward/record.uri?eid=2-s2.0-0023691045&partnerID=40&md5=a091af3e2cb641f06d1af6a03c94bf52	Biological Resourches Branch, National Institute of Allergy and Infectious Diseases, National Institutes of Health, Bethesda, MD 20892, United States	Koning, F., Biological Resourches Branch, National Institute of Allergy and Infectious Diseases, National Institutes of Health, Bethesda, MD 20892, United States; Yokoyama, W.M., Biological Resourches Branch, National Institute of Allergy and Infectious Diseases, National Institutes of Health, Bethesda, MD 20892, United States; Maloy, W.L., Biological Resourches Branch, National Institute of Alle…	Although four murine Cγ gene segments (Cγ1, 2, 3, and 4) are known to exist, the large majority of expressed γ-chains have been shown to be of the Cγ1 isotype and no evidence exists for the expression of more than one receptor by γδ TCR-bearing cells. We investigated the nature of the TCR expressed on a number of murine dendritic epidermal T cell-derived cell lines by using both Northern blot and…		t lymphocyte receptor; animal cell; cell culture; cell line; gamma chain; isotype; mouse; nonhuman; priority journal; thymus; Animal; Antigens, CD3; Antigens, Differentiation, T-Lymphocyte; Antigens, Surface; Cell Line; Dendritic Cells; Epidermis; Immunoglobulin Isotypes; Membrane Glycoproteins; Mice; Mice, Inbred C3H; Receptors, Antigen, T-Cell; RNA, Messenger; Support, Non-U.S. Gov't; T-Lymphoc…		Antigens, CD3; Antigens, Differentiation, T-Lymphocyte; Antigens, Surface; Immunoglobulin Isotypes; Membrane Glycoproteins; Receptors, Antigen, T-Cell; RNA, Messenger												221767		JOIMA	2971720	English	J. IMMUNOL.	Article	Final		Scopus	2-s2.0-0023691045
Bergstresser P.R.	7007054829;	Immunology and skin disorders	1988	Drug Development Research	13	43864		107	121			10.1002/ddr.430130204	https://www.scopus.com/inward/record.uri?eid=2-s2.0-0024236201&doi=10.1002%2fddr.430130204&partnerID=40&md5=aa848fcc3301d55c26707dbefa2c79d4	Department of Dermatology, University of Texas Health Science Center, Dallas, United States	Bergstresser, P.R., Department of Dermatology, University of Texas Health Science Center, Dallas, United States	Concepts of the function of skin have changed in the last decade from that of a barrier against microbiologic and chemical invasion to include its important role in immunity. This transition began with the recognition that skin could serve as a sensitive target of immunologic injury, typified by diseases such as lupus erythematosus and cutaneous vasculitis. Recently, a more complicated picture ha…	acquired immunodeficiency syndrome; contact hypersensitivity; graft‐versus‐host disease; Langerhans cell; lupus erythematosus; psoriasis; Thy‐1+ dendritic epidermal cells; ultraviolet radiation; unresponsiveness	alpha2 interferon; cyclosporin a; interleukin 1; phenytoin; thy 1 antigen; acquired immune deficiency syndrome; animal experiment; contact allergy; cytochemistry; epidermis; epidermis cell derived lymphocyte differentiation factor; graft versus host reaction; heredity; human; immunology; keratinocyte; langerhans cell; lupus erythematosus; nephrotoxicity; nonhuman; priority journal; psoriasis; rat…		cyclosporin A, 59865-13-3, 63798-73-2; phenytoin, 57-41-0, 630-93-3			Aberer, W., Schuler, G., Stingl, G., Honigsman, H., Wolff, K., Ultraviolet light depletes surface markers of Langerhans cells (1981) J. Invest. Dermatol., 76, pp. 202-210; Ansel, J.C., Luger, T.A., Green, I., The effect of in vitro and in vivo UV irradiation on the production of ETAF activity by human and murine keratinocytes (1983) J. Invest. Dermatol., 81, pp. 519-523; Arndt, K.A., Lee, D.A., K…	Bergstresser, P.R.; Dept. of Dermatology, Univ. of Texas Health Science Center, 5323 Harry Hines Blvd, Dallas, Texas, 75235, United States								2724391				English	Drug Dev. Res.	Article	Final		Scopus	2-s2.0-0024236201
Okamoto H., Itoh K., Welsh E., Trial J.A., Platsoucas C., Bucana C., Kripke M.L.	55451494900;7404897279;35862917600;55893310700;7005384527;7007184815;7101915890;	In vitro cytotoxic activity of interleukin 2-dependent murine Thy-1+ dendritic epidermal cell lines	1988	Journal of Leukocyte Biology	43	6		502	508		20	10.1002/jlb.43.6.502	https://www.scopus.com/inward/record.uri?eid=2-s2.0-0023939924&doi=10.1002%2fjlb.43.6.502&partnerID=40&md5=e2189456c5328659e18ec3af3668b74d	Department of Immunology, M.D. Anderson Hospital and Tumor Institute, Houston, TX 77030, United States	Okamoto, H., Department of Immunology, M.D. Anderson Hospital and Tumor Institute, Houston, TX 77030, United States; Itoh, K., Department of Immunology, M.D. Anderson Hospital and Tumor Institute, Houston, TX 77030, United States; Welsh, E., Department of Immunology, M.D. Anderson Hospital and Tumor Institute, Houston, TX 77030, United States; Trial, J.A., Department of Immunology, M.D. Anderson …	Thy-1+ dendritic epidermal cells (Tdec) are bone marrow-derived cells of T-cell lineage. In order to investigate the function of these cells, two interleukin 2-dependent Tdec lines (AU4 and AU16) were established from ear skin of C3H/HeN (MTV-) mice and examined for cytotoxicity against various murine tumor cells. The original phenotype of the Tdec, Thy-1+, AsGM1+, T3+, Lyt-1-, Lyt-2-, Lyt-5+, an…		animal experiment; cancer cell destruction; dendritic cell; mouse; natural killer cell; nonhuman; priority journal; skin cancer; Animalia; Murinae														7415400		JLBIE	2897994	English	J. LEUKOCYTE BIOL.	Article	Final		Scopus	2-s2.0-0023939924
Asarnow D.M., Kuziel W.A., Bonyhad M., Tigelaar R.E., Tucker P.W., Allison J.P.	6603251177;7006422901;24386161400;7007168145;7202804766;7401475344;	Limited diversity of γδ antigen receptor genes of thy-1+ dendritic epidermal cells	1988	Cell	55	5		837	847		400	10.1016/0092-8674(88)90139-0	https://www.scopus.com/inward/record.uri?eid=2-s2.0-0024276527&doi=10.1016%2f0092-8674%2888%2990139-0&partnerID=40&md5=47730157d635ed40153ab1b4e22cfca8	Department of Microbiology, Immunology University of California, Berkeley, CA 94720, United States; Cancer Research Laboratory University of California, Berkeley, CA 94720, United States; Department of Microbiology University, Texas Southwestern Medical Center Dallas, TX 75235, United States; Department of Dermatology University, Texas Southwestern Medical Center Dallas, TX 75235, United States	Asarnow, D.M., Department of Microbiology, Immunology University of California, Berkeley, CA 94720, United States; Kuziel, W.A., Cancer Research Laboratory University of California, Berkeley, CA 94720, United States; Bonyhad, M., Department of Microbiology, Immunology University of California, Berkeley, CA 94720, United States; Tigelaar, R.E., Department of Microbiology University, Texas Southwes…	T cells bearing γδ antigen receptors constitute minor populations in most peripheral lymphoid tissues but represent the major populations of T cells in certain epithelia, including the epidermis. We show that murine dendritic epidermal cell (dEC) clones express Vγ and Vδ gene segments, which are rare in adult T cells but predominate in fetal thymocytes. Analysis of the junctions of the rearranged…		lymphocyte antigen receptor; Receptors, Antigen, T Cell; Receptors, Antigen, T Cell, gamma delta; allele; amino acid sequence; animal; article; cell differentiation; dendritic cell; embryology; gene amplification; gene rearrangement; genetics; molecular genetics; mouse; nucleotide sequence; physiology; Southern blotting; thymus; Alleles; Amino Acid Sequence; Animal; Base Sequence; Blotting, South…	GENBANK: M23545	Receptors, Antigen, T-Cell; Receptors, Antigen, T-Cell, gamma-delta			Allison, Lanier, Structure, function, and serology of the T-cell antigen receptor complex (1987) Annu. Rev. Immunol., 5, pp. 503-540; Allison, McIntyre, Bloch, Tumor-specific antigen of murine T lymphoma defined with monoclonal antibody (1982) J. Immunol., 129, pp. 2293-2300; Alt, Baltimore, Joining of immunoglobulin heavy chain gene segments: implications from a chromosome with evidence of three…	Asarnow, D.M.; Department of Microbiology, Immunology University of California, Berkeley, CA 94720, United States								928674		CELLB	2847872	English	Cell	Article	Final		Scopus	2-s2.0-0024276527
Baker D., Healey D.G., Verghese S., Schafer H., Turk J.L.	7404141646;7005925873;7007152455;7202223220;7201527866;	Phenotypic analysis of guinea pig langerhans cells with antibodies directed against leucocyte surface antigens	1988	International Archives of Allergy and Immunology	86	3		350	355		13	10.1159/000234596	https://www.scopus.com/inward/record.uri?eid=2-s2.0-0023759040&doi=10.1159%2f000234596&partnerID=40&md5=062f4921b6964dcc50868d56c7d7290c	Department of Pathology, Royal College of Surgeons of England, London, United Kingdom; Institute for Immunology, University of Heidelberg, Germany	Baker, D., Department of Pathology, Royal College of Surgeons of England, London, United Kingdom; Healey, D.G., Department of Pathology, Royal College of Surgeons of England, London, United Kingdom; Verghese, S., Department of Pathology, Royal College of Surgeons of England, London, United Kingdom; Schafer, H., Institute for Immunology, University of Heidelberg, Germany; Turk, J.L., Department of…	The epidermis was stained with a panel of recently produced anti-guinea pig leucocyte antibodies. Guinea pig Langerhans cells were not detectable with antibodies directed against B lymphocytes (MSgp9), T lymphocytes (CT7 and MSgp7), T-helper/inducer (MSgpl2) and putative T-suppressor/cytotoxic (CT6 and MSgp6) subsets. Langerhans cell expressed both major histocompatibility complex (MHC) class-I a…		membrane antigen; animal cell; female; guinea pig; langerhans cell; leukocyte; male; nonhuman; phenotype; priority journal; Animal; Antibodies, Monoclonal; Antigens, Surface; Female; Guinea Pigs; Langerhans Cells; Leukocytes; Male; Phenotype; Support, Non-U.S. Gov't		Antibodies, Monoclonal; Antigens, Surface			Polak, L., Immunological aspects of contact sensitivity. An experimental study. Monogr (1980) Allergy, 15. , Karger, Basel; Asherson, G.L., Ptak, W., Contact and delayed hypersensitivity in mouse (1968) I. Active Sensitization and Passive Transfer. Immunology, 15, pp. 405-416; Katz, S.I., Tamaki, K., Sachs, D.H., Epidermal Langerhans cells are derived from cells originating in bone marrow (1979) …	Baker, D.; Royal College of Surgeons of England, Lincoln's Inn Fields, London, WC2A3 PN, United Kingdom								10182438			3403049	English	Int. Arch. Allergy Immunol.	Article	Final		Scopus	2-s2.0-0023759040
Nixon-Fulton J.L., Hackett Jr. J., Bergstresser P.R., Kumar V., Tigelaar R.E.	6602411425;7102250036;7007054829;7404634888;7007168145;	Phenotypic heterogeneity and cytotoxic activity of Con A and IL-2-stimulated cultures of mouse Thy-1+ epidermal cells	1988	Journal of Investigative Dermatology	91	1		62	68		36	10.1111/1523-1747.ep12463290	https://www.scopus.com/inward/record.uri?eid=2-s2.0-0023910149&doi=10.1111%2f1523-1747.ep12463290&partnerID=40&md5=fb28b7765643d66f00fbc2a523da8992	Department of Dermatology, University of Texas Health Science Center, Dallas, 75235-9069, United States	Nixon-Fulton, J.L., Department of Dermatology, University of Texas Health Science Center, Dallas, 75235-9069, United States; Hackett Jr., J., Department of Dermatology, University of Texas Health Science Center, Dallas, 75235-9069, United States; Bergstresser, P.R., Department of Dermatology, University of Texas Health Science Center, Dallas, 75235-9069, United States; Kumar, V., Department of De…	Short-term and long-term cultures of mouse Thy-1+ epidermal cells (EC) were established in order to characterize their phenotypic and functional properties. Concanavalin A (Con A) and Interleukin 2 (IL-2) stimulated Thy-1+ EC mediated non-MHC directed cytotoxicity preferentially against the NK-sensitive target, YAC-1 vs the NK-resistant target, P815; these cells also mediated antibody-dependent c…		concanavalin A; interleukin 2; animal experiment; cytotoxicity; epidermis; mouse; nonhuman; priority journal		concanavalin A, 11028-71-0; interleukin 2, 85898-30-2												0022202X		JIDEA	2898506	English	J. INVEST. DERMATOL.	Article	Final	Open Access	Scopus	2-s2.0-0023910149
Baxter C.S., Chalfin K., Andringa A., Miller M.L.	7102322697;6507140478;6701458276;7408160374;	Qualitative and quantitative effects on epidermal langerhans (Ia+) and Thy-1+ dendritic cells following topical application of phorbol diesters and mezerein	1988	Carcinogenesis	9	9		1563	1568		14	10.1093/carcin/9.9.1563	https://www.scopus.com/inward/record.uri?eid=2-s2.0-0023769546&doi=10.1093%2fcarcin%2f9.9.1563&partnerID=40&md5=9646636a209d7d3d71e0bf721b9cbae5	Department of Environmental Health, University of Cincinnati College of Medicine, 3223 Eden Avenue, Cincinnati, OH 45267-0056, United States	Baxter, C.S., Department of Environmental Health, University of Cincinnati College of Medicine, 3223 Eden Avenue, Cincinnati, OH 45267-0056, United States; Chalfin, K., Department of Environmental Health, University of Cincinnati College of Medicine, 3223 Eden Avenue, Cincinnati, OH 45267-0056, United States; Andringa, A., Department of Environmental Health, University of Cincinnati College of Me…	Repeated twice-weekly applications of promoting doses of 12-O-tetradecanoylphorbol-13-acetate (TPA) to the dorsal skin of female adult SENCAR mice led to a reduction in numbers per unit area of epidermal Thy-1+ dendritic cells. Although no parallel effect was observed on Ia+ Langerhans cells, a concurrent reduction of dendritic morphology of both cell types was observed. Topical administration of…		7,12 dimethylbenz[a]anthracene; phorbol 13 acetate 12 myristate; animal experiment; dendritic cell; histochemistry; histology; langerhans cell; mouse; nonhuman; skin carcinogenesis; ultrastructure; 9,10-Dimethyl-1,2-benzanthracene; Animal; Antigens, Surface; Antigens, Thy-1; Carcinogens; Dendritic Cells; Histocompatibility Antigens Class II; Langerhans Cells; Mice; Skin; Terpenes; Tetradecanoylph…		7,12 dimethylbenz[a]anthracene, 57-97-6; phorbol 13 acetate 12 myristate, 16561-29-8; 9,10-Dimethyl-1,2-benzanthracene, 57-97-6; Antigens, Surface; Antigens, Thy-1; Carcinogens; Histocompatibility Antigens Class II; mezerein, 34807-41-5; Terpenes; Tetradecanoylphorbol Acetate, 16561-29-8			Rowden, G., The Langerhans Cell. CRC Crit (1981) Rev. Immunol., 3, pp. 93-180; Streilein, J.W., Skin-associated lymphoid tissues (SALT) (1983) J. Invest. Dermatol., 80, pp. 122-126; Stingl, G., Katz, S.I., Shevach, E.M., Rosenthal, A.S., Green, I., Immunologic functions of la-bearing epidermal Langerhans cells (1978) J. Immunol, 121, pp. 3005-3013; Toews, G.B., Bergstresser, P.R., Streilein, J.W.…	Baxter, C.S.; Department of Environmental Health, University of Cincinnati College of Medicine, 3223 Eden Avenue, Cincinnati, OH 45267-0056, United States								1433334		CRNGD	2900701	English	Carcinogenesis	Article	Final		Scopus	2-s2.0-0023769546
Kuziel W.A., Takashima A., Bonyhadi M., Bergstresser P.R., Allison J.P., Tigelaar R.E., Tucker P.W.	7006422901;7103299656;6603714204;7007054829;7401475344;7007168145;7202804766;	Regulation of T-cell receptor γ-chain RNA expression in murine Thy-1+ dendritic epidermal cells	1988	Nature	328	6127		263	266		152		https://www.scopus.com/inward/record.uri?eid=2-s2.0-0023275040&partnerID=40&md5=07058bf81b9bca7e88a8720dfdfbcbd2	Graduate Program in Immunology, University of Texas Health Science Center at Dallas, Dallas, TX 75235, United States; Department of Dermatology, University of Texas Health Science Center at Dallas, Dallas, TX 75235, United States; Department of Internal Medicine, University of Texas Health Science Center at Dallas, Dallas, TX 75235, United States; Department of Microbiology, University of Texas H…	Kuziel, W.A., Graduate Program in Immunology, University of Texas Health Science Center at Dallas, Dallas, TX 75235, United States; Takashima, A., Department of Dermatology, University of Texas Health Science Center at Dallas, Dallas, TX 75235, United States; Bonyhadi, M., Cancer Research Laboratory, Department of Microbiology and Immunology, University of California, Berkeley 94720, United State…	The epidermis of normal mice contains two distinct populations of dendritic cells derived from the bone marrow, Ia+ Langerhans cells and Ia - cells that express the Thy-1 alloantigen1-5. The Thy-1-bearing dendritic epidermal cells (Thy-1+ dEC) have a surface phenotype similar to that of very early T-lineage cells6-8, produce IL-2-like growth factors10 and exhibit cytotoxicity which is not restric…		gamma chain; messenger RNA; T lymphocyte receptor; Thy 1 antigen; unclassified drug; animal cell; article; clone; dendritic cell; epidermis cell; genetic engineering; heredity; in vitro study; lymphocyte differentiation; mouse; nonhuman; priority journal; Animals; Antigens, Differentiation, T-Lymphocyte; Antigens, Surface; Antigens, Thy-1; Concanavalin A; Dendritic Cells; Epidermis; Gene Expressi…		Antigens, Differentiation, T-Lymphocyte; Antigens, Surface; Antigens, Thy-1; Concanavalin A, 11028-71-0; Peptide Fragments; RNA, Messenger; Receptors, Antigen, T-Cell; Receptors, Antigen, T-Cell, gamma-delta				Kuziel, W.A.; Graduate Program in Immunology, University of Texas Health Science Center at Dallas, Dallas, TX 75235, United States								280836			2885757	English		Article	Final		Scopus	2-s2.0-0023275040
Nakagawa S., Honma T., Kumon H., Jinno Y., Bang D., Ueki H., Ohmori H.	7402703494;7201857352;21334795000;7006722030;7005864352;7103108904;7202873744;	Scanning electron microscopic appearance of Thy-1 positive dentritic epidermal cells in mouse epidermal cell suspension	1988	Journal of Dermatology	15	5		445	447			10.1111/j.1346-8138.1988.tb04084.x	https://www.scopus.com/inward/record.uri?eid=2-s2.0-0024245616&doi=10.1111%2fj.1346-8138.1988.tb04084.x&partnerID=40&md5=48a8dca8d9b8e86a4ffe81fd34b1bfde	Department of Dermatology, Kawasaki Medical School, Kurashiki 701-01, Japan	Nakagawa, S., Department of Dermatology, Kawasaki Medical School, Kurashiki 701-01, Japan; Honma, T., Department of Dermatology, Kawasaki Medical School, Kurashiki 701-01, Japan; Kumon, H., Department of Dermatology, Kawasaki Medical School, Kurashiki 701-01, Japan; Jinno, Y., Department of Dermatology, Kawasaki Medical School, Kurashiki 701-01, Japan; Bang, D., Department of Dermatology, Kawasak…	The distribution of Thy-1.2 antigens and asialo GM1 on suspended epidermal cells prepared from C3H/He mice by trypsinizing their ear skin was examined by the scanning immunoelectron microscopic method using antibodies against the antigens and antibody-bacteriophage T4 conjugates as visual markers. Thy-1.2 and asialo GM1 were found to be distributed diffusely over a cell type with a relatively cub…		Thy 1 antigen; animal cell; dendritic cell; epidermis cell; histochemistry; mouse; nonhuman; scanning electron microscopy; ultrastructure														3852407		JDMYA	2906074	English	J. DERMATOL.	Article	Final		Scopus	2-s2.0-0024245616
Takashima A., Nixon-Fulton J.L., Bergstresser P.R., Tigelaar R.E.	7103299656;6602411425;7007054829;7007168145;	Thy-1+ dendritic epidermal cells in mice: Precursor frequency analysis and cloning of concanavalin A-reactive cells	1988	Journal of Investigative Dermatology	90	5		671	678		33	10.1111/1523-1747.ep12560835	https://www.scopus.com/inward/record.uri?eid=2-s2.0-0023938120&doi=10.1111%2f1523-1747.ep12560835&partnerID=40&md5=2b1bb79861f7d37596f27fc3fce1b060	Departments of Dermatology and Internal Medicine, University of Texas Southwestern Medical Center at Dallas, Dallas, TX, United States	Takashima, A., Departments of Dermatology and Internal Medicine, University of Texas Southwestern Medical Center at Dallas, Dallas, TX, United States; Nixon-Fulton, J.L., Departments of Dermatology and Internal Medicine, University of Texas Southwestern Medical Center at Dallas, Dallas, TX, United States; Bergstresser, P.R., Departments of Dermatology and Internal Medicine, University of Texas So…	Bulk cultures of mouse Thy-1+ dendritic epidermal cells (Thy-1+ DEC) have been shown to proliferate in response to concanavalin A (Con A) and IL-2, to secrete IL-2-like growth factors, and to lyse target cells such as YAC-1. Limiting dilution microculture was utilized in order to determine the precursor frequency of Con A-responsive Thy-1+ DEC in suspensions of AKR/J epidermal cells as well as wh…		concanavalin a; animal cell; cell culture; cloning; dendritic cell; mouse; nonhuman; priority journal; Animal; Antigens, Surface; Antigens, Thy-1; Cell Division; Clone Cells; Concanavalin A; Cytological Techniques; Cytotoxicity, Immunologic; Dendritic Cells; Epidermis; Interleukin-2; Mice; Mice, Inbred Strains; Phenotype; Support, Non-U.S. Gov't; Support, U.S. Gov't, P.H.S.		concanavalin A, 11028-71-0; Antigens, Surface; Antigens, Thy-1; Concanavalin A, 11028-71-0; Interleukin-2				Tigelaar, R.E.; Departments of Dermatology and Internal Medicine, University of Texas Southwestern Medical Center at Dallas, Dallas, TX, United States								0022202X		JIDEA	2896217	English	J. Invest. Dermatol.	Article	Final	Open Access	Scopus	2-s2.0-0023938120
Nixon-Fulton J.L., Kuziel W.A., Santerse B., Bergstresser P.R., Tucker P.W., Tigelaar R.E.	6602411425;7006422901;6507714302;7007054829;7202804766;7007168145;	Thy-1+ epidermal cells in nude mice are distinct from their counterparts in thymus-bearing mice: A study of morphology, function, and T cell receptor expression	1988	Journal of Immunology	141	6		1897	1903		29		https://www.scopus.com/inward/record.uri?eid=2-s2.0-0023740847&partnerID=40&md5=4f19847337da82eb78b83e9ed80cdd43	Department of Dermatology, University of Texas Health Science Center, Dallas, TX 75235, United States	Nixon-Fulton, J.L., Department of Dermatology, University of Texas Health Science Center, Dallas, TX 75235, United States; Kuziel, W.A., Department of Dermatology, University of Texas Health Science Center, Dallas, TX 75235, United States; Santerse, B., Department of Dermatology, University of Texas Health Science Center, Dallas, TX 75235, United States; Bergstresser, P.R., Department of Dermatol…	We have evaluated the morphology, function, and TCR mRNA and DNA profiles of Thy-1+ epidermal cells (EC) derived from athymic (nude) mice. Based on these criteria we demonstrate that Thy-1+ EC in nude mice are predominantly round and angular and located in follicular epithelium, as compared to predominantly dendritic, interfollicular Thy-1+ EC found in normal CBA or BALB/c mice. Functionally, Thy…		interleukin 2; okt 3; t lymphocyte receptor; thy 1 antigen; animal cell; cell culture; cytology; epidermis; lymphocyte differentiation; mouse; nonhuman; priority journal; Animal; Antigens, Surface; Antigens, Thy-1; Blotting, Northern; Blotting, Southern; Cell Division; Comparative Study; Concanavalin A; Dendritic Cells; Epidermis; Ethers; Female; Interleukin-2; Ionomycin; Male; Mice; Mice, Inbred…		interleukin 2, 85898-30-2; OKT 3, 140608-64-6; Antigens, Surface; Antigens, Thy-1; Concanavalin A, 11028-71-0; Ethers; Interleukin-2; Ionomycin, 56092-81-0; Receptors, Antigen, T-Cell; Tetradecanoylphorbol Acetate, 16561-29-8												221767		JOIMA	2902136	English	J. IMMUNOL.	Article	Final		Scopus	2-s2.0-0023740847
Allison J.P., Hayran W.L., Asarnow D., Tigelaar R.E., Tucker P.W., Bonyhadi M.	7401475344;25023267400;6603251177;7007168145;7202804766;6603714204;	γδ Antigen receptors of Thy-1 + dendritic epidermal cells: Implications for thymic differentiation	1988	Immunologic Research	7	4		292	302		6	10.1007/BF02935534	https://www.scopus.com/inward/record.uri?eid=2-s2.0-0024261709&doi=10.1007%2fBF02935534&partnerID=40&md5=0efb7ed3c878e33c33f81ca99cdc21cf	Cancer Research Laboratory, University of California, 3510 Life Sciences Building, Berkeley, 94720, CA, United States; University of Texas Health Science Center, Dallas, Tex., United States	Allison, J.P., Cancer Research Laboratory, University of California, 3510 Life Sciences Building, Berkeley, 94720, CA, United States; Hayran, W.L., Cancer Research Laboratory, University of California, 3510 Life Sciences Building, Berkeley, 94720, CA, United States; Asarnow, D., Cancer Research Laboratory, University of California, 3510 Life Sciences Building, Berkeley, 94720, CA, United States; …	[No abstract available]		t lymphocyte receptor; thy 1 antigen; animal cell; cell culture; dendritic cell; lymphocyte differentiation; mouse; nonhuman; review; thymus; Animal; Antigens, CD3; Antigens, Differentiation, T-Lymphocyte; Antigens, Surface; Antigens, Thy-1; Base Sequence; Cell Differentiation; Dendritic Cells; DNA; Gene Expression Regulation; Gene Rearrangement, gamma-Chain T-Cell Antigen Receptor; Gene Rearrang…		Antigens, CD3; Antigens, Differentiation, T-Lymphocyte; Antigens, Surface; Antigens, Thy-1; DNA, 9007-49-2; Receptors, Antigen, T-Cell; Receptors, Antigen, T-Cell, gamma-delta			Allison, J.P., Lanier, L.L., Structure, function, and serology of the T-cell antigen receptor complex (1987) Annu. Rev. Immunol., 5, pp. 503-540; Saito, H., Kranz, D.M., Takagaki, Y., Hayday, A.C., Eisen, H.N., Tonegawa, S., Complete primary structure of a heterodimeric T-cell receptor deduced from cDNA sequences (1984) Nature, Lond., 309, pp. 757-762; Brenner, M.B., McLean, J., Dialynas, D.P., S…	Allison, J.P.; Cancer Research Laboratory, University of California, 3510 Life Sciences Building, Berkeley, 94720, CA, United States			Humana Press					0257277X		IMRSE	2906352	English	Immunol Res	Article	Final		Scopus	2-s2.0-0024261709
Rheins L.A., Cotleur A.L., Kleier R.S., Hoppenjans W.B., Saunder D.N., Nordlund J.J.	6603963559;6507181475;6507055603;6507970422;6506072927;7005882211;	Alpha-melanocyte stimulating hormone modulates contact hypersensitivity responsiveness in C57/BL6 mice	1989	Journal of Investigative Dermatology	93	4		511	517		74	10.1111/1523-1747.ep12284064	https://www.scopus.com/inward/record.uri?eid=2-s2.0-0024343116&doi=10.1111%2f1523-1747.ep12284064&partnerID=40&md5=54c70518600af15bb4b44ed0aaf32b85	University of Cincinnati College of Medicine (LAR, ALC, RSK, WBH), Department of Dermatology, Cincinnati, OH, United States; McMaster University (DNS, JJN), Department of Medicine, Division of Dermatology, Hamilton, Ont., Canada	Rheins, L.A., University of Cincinnati College of Medicine (LAR, ALC, RSK, WBH), Department of Dermatology, Cincinnati, OH, United States; Cotleur, A.L., University of Cincinnati College of Medicine (LAR, ALC, RSK, WBH), Department of Dermatology, Cincinnati, OH, United States; Kleier, R.S., University of Cincinnati College of Medicine (LAR, ALC, RSK, WBH), Department of Dermatology, Cincinnati, …	The neuropeptide alpha-melanocyte stimulating hormone (α-MSH) can act as an antagonist to interleukin 1 (IL-1) bioactivities such as inhibition of fever production, thymocyte proliferation, and inhibition of release of acute phase inflammatory molecules from the liver. In this report we have found that epicutaneous application of α-MSH suppresses both the sensitization and elicitation limbs of th…		alpha intermedin; animal cell; animal experiment; contact allergy; mouse; nonhuman; priority journal						Rheins, L.A.; University of Cincinnati College of Medicine (LAR, ALC, RSK, WBH), Department of Dermatology, Cincinnati, OH, United States								0022202X		JIDEA	2550560	English	J. Invest. Dermatol.	Article	Final	Open Access	Scopus	2-s2.0-0024343116
Alcalay J., Craig J.N., Kripke M.L.	7006120481;7401926296;7101915890;	Alterations in Langerhans Cells and Thy-1+ Dendritic Epidermal Cells in Murine Epidermis during the Evolution of Ultraviolet Radiation-induced Skin Cancers	1989	Cancer Research	49	16		4591	4596		30		https://www.scopus.com/inward/record.uri?eid=2-s2.0-0024348358&partnerID=40&md5=ced1e369a4c5cf492eb7a47db56ce5f4	Dermatology Foundation, Schering-Plough Foundation, Inc., United States; Department of Immunology, University of Texas, M. D. Anderson Cancer Center, Houston, Texas 77030, United States; Department of Immunology-178, University of Texas, M. D. Anderson Cancer Center, 1515 Holcombe Blvd, Houston, TX 77030, United States	Alcalay, J., Dermatology Foundation, Schering-Plough Foundation, Inc., United States; Craig, J.N., Department of Immunology, University of Texas, M. D. Anderson Cancer Center, Houston, Texas 77030, United States; Kripke, M.L., Department of Immunology-178, University of Texas, M. D. Anderson Cancer Center, 1515 Holcombe Blvd, Houston, TX 77030, United States	To understand the role of cutaneous immune cells in host resistance to the induction and growth of skin cancer, we investigated the number and morphology of murine dendritic epidermal cells (dEC during the evolution of ultraviolet (UVA) UV-induced skin cancers. Female C3H/ HeN mice were treated topically with 8-methoxypsoralen followed by ultraviolet A (UVA) radiation 3 times/week or irradiated w…		methoxsalen; animal cell; animal experiment; cell structure; histochemistry; histology; langerhans cell; mouse; nonhuman; priority journal; puva; radiation carcinogenesis; skin carcinogenesis; ultraviolet radiation; Adenosinetriphosphatase; Animal; Antigens, Surface; Antigens, Thy-1; Dendrites; Epidermis; Female; Histocompatibility Antigens Class II; Immunoenzyme Techniques; Langerhans Cells; Mic…		methoxsalen, 298-81-7, 8004-26-0; Adenosinetriphosphatase, EC 3.6.1.3; Antigens, Surface; Antigens, Thy-1; Histocompatibility Antigens Class II		elder pharmaceuticals, United States	Wolff, K., Stingl, G., The Langerhans cell (1983) J. Invest. Dermatol, 80, pp. 17s-21s; Bergstresser, P.R., Tigelaar, R.E., Dees, J.H., Streilein, J.W., Thy-1 antigen-bearing dendritic cells populate murine epidermis (1983) J. Invest. Dermatol., 81, pp. 286-288; Tschachler, F., Schuler, G., Hutterer, J., Leibl, H., Wolff, K., Stingl, G., Expression of Thy-1 antigen by murine epidermal cells (1983…									85472			2568173	English	Cancer Res.	Article	Final		Scopus	2-s2.0-0024348358
Baxter C.S., Chalfin K., Miller M.L.	7102322697;6507140478;7408160374;	Comparative histomorphometric changes in SENCAR mouse epidermis in response to multiple treatments with complete and stage-specific tumor promoting agents	1989	Carcinogenesis	10	10		1855	1861		18	10.1093/carcin/10.10.1855	https://www.scopus.com/inward/record.uri?eid=2-s2.0-0024412974&doi=10.1093%2fcarcin%2f10.10.1855&partnerID=40&md5=5a33fe4f7555fab0872763994106c848	Department of Enviromental Health, University of Cincinnati Medical Center, Cincinnati, OH 45267-0056, United States	Baxter, C.S., Department of Enviromental Health, University of Cincinnati Medical Center, Cincinnati, OH 45267-0056, United States; Chalfin, K., Department of Enviromental Health, University of Cincinnati Medical Center, Cincinnati, OH 45267-0056, United States; Miller, M.L., Department of Enviromental Health, University of Cincinnati Medical Center, Cincinnati, OH 45267-0056, United States	Responses of various cells of the epidermis and dermis to topically applied agents have been implicated in the mechanism of multistage mouse twnorigenesls. These responses have been discussed almost entirely in the context of a single promoter treatment, although tumor expression is dependent on multiple applications. Responses of keratinocytes, epidermal dendritic non-keratinocytes and dennal le…		mezerein; phorbol ester; tumor promoter; animal experiment; animal model; epidermis; histology; mouse; nonhuman; phenylpropiolic acid ethyl ester; skin carcinogenesis; Acetone; Alkanes; Alkynes; Animal; Carcinogens; Epidermis; Female; Langerhans Cells; Leukocytes; Male; Mice; Mice, Inbred Strains; Skin; Support, U.S. Gov't, P.H.S.; Terpenes; Tetradecanoylphorbol Acetate		mezerein, 34807-41-5; Acetone, 67-64-1; Alkanes; Alkynes; Carcinogens; ethylphenylpropiolate, 2216-94-6; mezerein, 34807-41-5; n-dodecane, 112-40-3; Terpenes; Tetradecanoylphorbol Acetate, 16561-29-8			Baxter, C.S., Miller, M.L., Mechanism of mouse skin tumor promotion by n-dodecane (1987) Carcinogenesis, 8, pp. 1787-1790; Saffiotti, U., Shubik, P., Promoting action in skin carcinogenesis (1963) Natl. Cancer Inst. Monograph, 10, pp. 489-507; Bingham, E., Horton, A.W., Environmental carcinogenesis: Environmental observations related to occupational cancer (1966) Adv. Biol Skin, 7, pp. 183-193; S…	Baxter, C.S.; Department of Enviromental Health, University of Cincinnati Medical Center, Cincinnati, OH 45267-0056, United States								1433334		CRNGD	2791204	English	Carcinogenesis	Article	Final		Scopus	2-s2.0-0024412974
Aiba S., Yoshie O., Tomita Y., Tagami H.	35393575200;7103156924;7401772866;7101834005;	Cross-reactivity of murine monoclonal anti-DNA antibodies with human and murine skin: A possible pathogenetic role in skin lesions of lupus erythematosus	1989	Journal of Investigative Dermatology	93	6		739	745		12	10.1111/1523-1747.ep12284398	https://www.scopus.com/inward/record.uri?eid=2-s2.0-0024460399&doi=10.1111%2f1523-1747.ep12284398&partnerID=40&md5=7b2727285eeede1e1100ba76397050f9	Department of Dermatology, Tohoku University School of Medicine, Seiryomachi, Sendai, Japan; Department of Bacteriology, Tohoku University School of Medicine, Seiryomachi, Sendai, Japan	Aiba, S., Department of Dermatology, Tohoku University School of Medicine, Seiryomachi, Sendai, Japan; Yoshie, O., Department of Bacteriology, Tohoku University School of Medicine, Seiryomachi, Sendai, Japan; Tomita, Y., Department of Dermatology, Tohoku University School of Medicine, Seiryomachi, Sendai, Japan; Tagami, H., Department of Dermatology, Tohoku University School of Medicine, Seiryoma…	Anti-DNA autoantibodies are known to cross-react with a wide variety of substances including cell-surface molecules. Thus, we examined cross-reactivities of 20 murine monoclonal anti-DNA antibodies with normal human and mouse skin tissues. Hybridomas producing these monoclonal antibodies were established from non-immunized spleen cells from autoimmune MRL-1 pr/1 pr mice, a strain characterized by…		dna antibody; monoclonal antibody; animal cell; animal experiment; clinical article; cross reaction; etiology; histochemistry; human; human cell; lupus erythematosus; mouse; nonhuman; priority journal; skin; Animal; Antibodies, Antinuclear; Antibodies, Monoclonal; Cross Reactions; Dendritic Cells; Fluorescent Antibody Technique; Human; Langerhans Cells; Lupus Erythematosus, Systemic; Mast Cells; …		Antibodies, Antinuclear; Antibodies, Monoclonal				Tagami, H.; Department of Dermatology, Tohoku University School of Medicine, Seiryomachi, Sendai, Japan								0022202X		JIDEA	2685123	English	J. Invest. Dermatol.	Article	Final	Open Access	Scopus	2-s2.0-0024460399
Tschachler E., Steiner G., Yamada H., Elbe A., Wolff K., Stingl G.	56273310700;7201592455;55741872200;7003877845;35391524200;7102655442;	Dendritic epidermal T cells: Activation requirements and phenotypic characterization of proliferating cells	1989	Journal of Investigative Dermatology	92	5		763	768		15	10.1016/0022-202X(89)90197-8	https://www.scopus.com/inward/record.uri?eid=2-s2.0-0024329972&doi=10.1016%2f0022-202X%2889%2990197-8&partnerID=40&md5=1efbc86d362d67f137160114b8247ff3	Department of Dermatology I., Division of Cutaneous Immunobiology, University of Vienna Medical School, Vienna, Austria	Tschachler, E., Department of Dermatology I., Division of Cutaneous Immunobiology, University of Vienna Medical School, Vienna, Austria; Steiner, G., Department of Dermatology I., Division of Cutaneous Immunobiology, University of Vienna Medical School, Vienna, Austria; Yamada, H., Department of Dermatology I., Division of Cutaneous Immunobiology, University of Vienna Medical School, Vienna, Aust…	Dendritic epidermal T cells (DETC) are CD45 + , Thy-1 + , CD5 - , CD8 - , CD4 - murine lymphocytes that express surface-bound CD3 antigens associated with T cell receptor γ/δ heterodimers. Using epidermal cells greatly enriched for DETC and depleted of Langerhans cells, we found that DETC have growth requirements quite different from those of accessory cell-depleted lymph node and splenic T cells…		cell growth; dendritic cell; epidermis; human; human cell; phenotype; priority journal; t lymphocyte; Animal; Antigens, Surface; Antigens, Thy-1; Cell Division; Comparative Study; Dendritic Cells; Epidermis; Interleukin-2; Lymphocyte Activation; Male; Mice; Mice, Inbred Strains; Phenotype; Rats; Rats, Inbred Lew; Receptors, Antigen, T-Cell; Recombinant Proteins; Spleen; Support, Non-U.S. Gov't; T…		Antigens, Surface; Antigens, Thy-1; Interleukin-2; Receptors, Antigen, T-Cell; Recombinant Proteins				Stingl, G.; Department of Dermatology I., Division of Cutaneous Immunobiology, University of Vienna Medical School, Vienna, Austria								0022202X		JIDEA	2565932	English	J. Invest. Dermatol.	Article	Final	Open Access	Scopus	2-s2.0-0024329972
Takagaki Y., DeCloux A., Bonneville M., Tonegawa S.	7101636598;6603497928;7006414182;56243320800;	Diversity of γδ T-cell receptors on murine intestinal intraepithelial lymphocytes	1989	Nature	339	6227		712	714		169	10.1038/339712a0	https://www.scopus.com/inward/record.uri?eid=2-s2.0-0024370995&doi=10.1038%2f339712a0&partnerID=40&md5=bf9723cf3f61d12644ad24e188b91884	Howard Hughes Medical Institute and Center for Cancer Research, Department of Biology, Massachusetts Institute of Technology, Cambridge, MA 02139, United States	Takagaki, Y., Howard Hughes Medical Institute and Center for Cancer Research, Department of Biology, Massachusetts Institute of Technology, Cambridge, MA 02139, United States; DeCloux, A., Howard Hughes Medical Institute and Center for Cancer Research, Department of Biology, Massachusetts Institute of Technology, Cambridge, MA 02139, United States; Bonneville, M., Howard Hughes Medical Institute …	THE search for the genes encoding the T-cell receptor (TCR)α -and β-subunits revealed a third gene γ which shares with the α-and βgenes several properties including somatic rearrangement1,2. This gene, together with a fourth rearranging gene δ3,4, encodes a second type of T-cell receptor, TCR γδ5-8. Although TCR γδ-bearing T cells constitute a relatively minor subpopulation in the thymus and in p…		t lymphocyte receptor; animal cell; intestine epithelium; mouse; nonhuman; priority journal; Animal; Base Sequence; Epithelial Cells; Gene Rearrangement, gamma-Chain T-Cell Antigen Receptor; Gene Rearrangement, T-Lymphocyte; Intestines; Macromolecular Systems; Mice; Mice, Inbred C57BL; Molecular Sequence Data; Receptors, Antigen, T-Cell; Support, Non-U.S. Gov't; Support, U.S. Gov't, P.H.S.; T-Lym…		Macromolecular Systems; Receptors, Antigen, T-Cell			Saito, H., (1984) Nature, 309, pp. 757-762; Hayday, A.C., (1985) Cell, 40, pp. 259-269; Chien, Y.-H., Iwashima, M., Kaplan, K.B., Elliott, J.F., Davis, M.M., (1987) Nature, 327, pp. 677-682; Chien, Y.-H., (1987) Nature, 330, pp. 722-727; Brenner, M.B., (1986) Nature, 322, pp. 145-149; Lew, A.M., (1986) Science, 234, pp. 1401-1405; Nakanishi, N., Maeda, K., Ito, K., Heller, M., Tonegawa, S., (1987…	Takagaki, Y.; Howard Hughes Medical Institute and Center for Cancer Research, Department of Biology, Massachusetts Institute of Technology, Cambridge, MA 02139, United States								280836			2544806	English		Article	Final		Scopus	2-s2.0-0024370995
Alcalay J., Bucana C., Kripke M.L.	7006120481;7007184815;7101915890;	Effect of psoralens and ultraviolet radiation on murine dendritic epidermal cells	1989	Journal of Investigative Dermatology	92	5		657	662		8	10.1016/0022-202X(89)90178-4	https://www.scopus.com/inward/record.uri?eid=2-s2.0-0024386887&doi=10.1016%2f0022-202X%2889%2990178-4&partnerID=40&md5=9b5707f501a9da987a52072a2b12ba09	Department of Immunology (JA, MLK), The University of Texas, M.D. Anderson Cancer Center, Houston, TX, United States; Department of Cell Biology (CB), The University of Texas, M.D. Anderson Cancer Center, Houston, TX, United States	Alcalay, J., Department of Immunology (JA, MLK), The University of Texas, M.D. Anderson Cancer Center, Houston, TX, United States; Bucana, C., Department of Cell Biology (CB), The University of Texas, M.D. Anderson Cancer Center, Houston, TX, United States; Kripke, M.L., Department of Immunology (JA, MLK), The University of Texas, M.D. Anderson Cancer Center, Houston, TX, United States	Monofunctional psoralens produce less phototoxicity than bifunctional psoralens after ultraviolet A (UVA) irradiation. We investigated the effect of repetitive treatments with angelicin (isopsoralen), a monofunctional psoralen, plus UVA radiation (IPUVA) on the number and morphology of dendritic epidermal cells (dEC). This effect was compared with that of 8-methoxypsoralen plus UVA radiation (PUV…		angelicin; methoxsalen; animal cell; animal experiment; dendritic cell; epidermis; histochemistry; mouse; nonhuman; priority journal; PUVA; topical drug administration; ultraviolet A radiation; ultraviolet B radiation		angelicin, 523-50-2; methoxsalen, 298-81-7, 8004-26-0	oxsoralen, Elder Pharmaceuticals, United States	Elder Pharmaceuticals, United States; HRI, United States		Kripke, M.L.; Department of Immunology (JA, MLK), The University of Texas, M.D. Anderson Cancer Center, Houston, TX, United States								0022202X		JIDEA	2565931	English	J. Invest. Dermatol.	Article	Final	Open Access	Scopus	2-s2.0-0024386887
Ishida Y., Kawaichi M., Honjo T., Taguchi O., Inaba K., Minato N., Nishi M.	7402605866;57195456266;36013822600;36730381400;56981858400;7006697581;7202339086;	Effects of the deregulated expression of human interleukin-2 in transgenic mice	1989	International Immunology	1	2		113	120		37	10.1093/intimm/1.2.113	https://www.scopus.com/inward/record.uri?eid=2-s2.0-0024469927&doi=10.1093%2fintimm%2f1.2.113&partnerID=40&md5=98285354c229cbb48283db07f93b547f	Department of Medical Chemistry, Kyoto University, Kyoto, 606, Japan; Laboratory of Experimental Pathology, Aichi Cancer Center Research Institute, Nagoya, 464, Japan; Department of Zoology, Kyoto University, Kyoto, 606, Japan; Department of Medicine, Jichi Medical School, Tochigi, 329-04, Japan; Department of Molecular Biology, Research Institute of Scripps Clinic, La Jolla, CA, 92037, United St…	Ishida, Y., Department of Medical Chemistry, Kyoto University, Kyoto, 606, Japan; Kawaichi, M., Department of Medical Chemistry, Kyoto University, Kyoto, 606, Japan; Honjo, T., Department of Medical Chemistry, Kyoto University, Kyoto, 606, Japan; Taguchi, O., Laboratory of Experimental Pathology, Aichi Cancer Center Research Institute, Nagoya, 464, Japan; Inaba, K., Department of Zoology, Kyoto U…	We constructed transgenic mice that carry the cDNA of human interleukln-2 (IL-2) under the control of the H-2Kd promoter. The IL-2 transgenic mice expressed human IL-2 mRNA in the thymus, spleen, bone marrow, lung, muscle and skin. Human IL-2 protein was also detected in their sera. The IL-2 transgenic mice suffered from alopecia and pneumonia, but no typical autoimmune reactions seemed to be inv…	Alopecia; Immune dysfunction; Pneumonia; T cell repertoire; Thy-1+ dendritic epidermal cell	interleukin 2; thy 1 antigen; alopecia; animal cell; animal model; cell culture; cytology; dendritic cell; epidermis; gene expression; genetic engineering; histology; human; mouse; nonhuman; pneumonia; priority journal; t lymphocyte; transgenic mouse; Alopecia; Animal; Autoimmunity; DNA; Gene Expression; Human; Interleukin-2; Lymphocytes; Mice; Mice, Transgenic; Pneumonia; RNA, Messenger; Skin Tr…		interleukin 2, 85898-30-2; DNA, 9007-49-2; Interleukin-2; RNA, Messenger			Smith, K.A., (1988) Lnterleukin-2 Inception, Impact and Implications Science, 240, p. 1169; Tsudo, M., Kozak, R.W., Goldman, C.K., Waldmann, T.A., Demonstration of non-Tac peptide that binds interleukin 2 a potential participant in a multichain interleukin 2 receptor complex (1986) Proc Natl Acad. Sci., 83, p. 9694. , USA; Teshigawara, K., Wang, H., Kato, K., Smith, K.A., Interleukin 2 high-affin…									9538178			2487682	English	Int. Immunol.	Article	Final		Scopus	2-s2.0-0024469927
Tani M., Murata Y., Harada S., Takashima T., Horikawa T.	7202548786;7402473554;16746408300;57206113589;7102782237;	Increased contact hypersensitivity response in mice by topical application of 1α,25-dihydroxyvitamin D3 to elicitation site	1989	Archives of Dermatological Research	281	5		355	361		9	10.1007/BF00412982	https://www.scopus.com/inward/record.uri?eid=2-s2.0-0024465026&doi=10.1007%2fBF00412982&partnerID=40&md5=d27dc0d149738dfe49610d6dd1b53846	Department of Dermatology, Kobe University School of Medicine, 5 Kusunoki-Cho, 7 Chome, Chuo-Ku, Kobe, 650, Japan	Tani, M., Department of Dermatology, Kobe University School of Medicine, 5 Kusunoki-Cho, 7 Chome, Chuo-Ku, Kobe, 650, Japan; Murata, Y., Department of Dermatology, Kobe University School of Medicine, 5 Kusunoki-Cho, 7 Chome, Chuo-Ku, Kobe, 650, Japan; Harada, S., Department of Dermatology, Kobe University School of Medicine, 5 Kusunoki-Cho, 7 Chome, Chuo-Ku, Kobe, 650, Japan; Takashima, T., Depar…	Recent evidence indicates that the biologically active metabolite of vitamin D3, 1α,25-dihydroxy-vitamin D3 [1α,25(OH)2D3], has an effect on the regulation of the immune response. We investigated whether topical treatment of mice with 1α,25(OH)2D3 influences the contact hypersensitivity (CHS) response to trinitrochlorobenzene (TNCB). 1α,25(OH)2D3 was applied to the dorsal trunk of A/J mice on day…	1α,25-Dihydroxyvitamin D3; Contact hypersensitivity; Vitamin D3	24,25 dihydroxycolecalciferol; calcitriol; animal experiment; chlorotrinitrobenzene; contact dermatitis; histology; mouse; nonhuman; priority journal; skin allergy; Administration, Topical; Animal; Antigens, Surface; Antigens, Thy-1; Calcitriol; Dendritic Cells; Dermatitis, Contact; Epidermis; Female; Langerhans Cells; Mice; Mice, Inbred Strains; Picryl Chloride		24,25 dihydroxycolecalciferol, 40013-87-4; calcitriol, 32222-06-3, 32511-63-0, 66772-14-3; Antigens, Surface; Antigens, Thy-1; Calcitriol, 32222-06-3; Picryl Chloride, 88-88-0			Amento, E.P., Bhalla, A.K., Kurnick, J.T., Kradin, R.L., Clemens, T.L., Holick, S.A., Holick, M.F., Krane, S.M., 1α,25-dihydroxyvitamin D<inf>3</inf> induces maturation of the human monocyte cell line U937, and, in association with a factor from human T lymphocytes, augments production of the monokine mononuclear cell factor (1984) J Clin Invest, 73, pp. 731-739; Bergstresser, P.R., Tigelaar, R.E…	Tani, M.; Department of Dermatology, Kobe University School of Medicine, 5 Kusunoki-Cho, 7 Chome, Chuo-Ku, Kobe, 650, Japan			Springer-Verlag					3403696		ADMFA	2572200	English	Arch Dermatol Res	Article	Final		Scopus	2-s2.0-0024465026
Lafaille J.J., DeCloux A., Bonneville M., Takagaki Y., Tonegawa S.	7004050262;6603497928;7006414182;7101636598;56243320800;	Junctional sequences of T cell receptor γδ genes: Implications for γδ T cell lineages and for a novel intermediate of V-(D)-J joining	1989	Cell	59	5		859	870		452	10.1016/0092-8674(89)90609-0	https://www.scopus.com/inward/record.uri?eid=2-s2.0-0024791338&doi=10.1016%2f0092-8674%2889%2990609-0&partnerID=40&md5=8595cea46dd7b740eaea20266fd4901c	Howard Hughes Medical Institute, Center for Cancer Research, Department of Biology Massachusetts Institute of Technology Cambridge, MA 02139, United States	Lafaille, J.J., Howard Hughes Medical Institute, Center for Cancer Research, Department of Biology Massachusetts Institute of Technology Cambridge, MA 02139, United States; DeCloux, A., Howard Hughes Medical Institute, Center for Cancer Research, Department of Biology Massachusetts Institute of Technology Cambridge, MA 02139, United States; Bonneville, M., Howard Hughes Medical Institute, Center …	Nucleotide sequences of a large number of V-(D)-J junctions of T cell receptor (TCR) γ and δ genes show that most fetal thymocytes express on their surface one of just two γδ TCRs known to be expressed by epidermal γδ T cells (s-IEL) or intraepithelial γδ T cells associated with female reproductive organs (r-IEL). In contrast, γδ TCRs expressed on adult thymocytes are highly diverse as a result o…		t lymphocyte receptor; animal cell; antigen diversity; antigen recognition; article; dna sequence; gene expression; gene structure; genetic engineering; mouse; nonhuman; priority journal; Aging; Animal; Animals, Newborn; Base Sequence; Codon; Fetus; Gene Amplification; Genes, Immunoglobulin; Genes, Structural; Immunoglobulin Joining Region; Macromolecular Systems; Mice; Mice, Inbred C57BL; Molecu…		Codon; Immunoglobulin Joining Region; Macromolecular Systems; Receptors, Antigen, T-Cell			Allison, McIntyre, Block, Tumor-specific antigen of murine T lymphoma defined with monoclonal antibody (1982) J. Immunol., 129, pp. 2293-2300; Alt, Baltimore, Joining of immunoglobulin heavy chain gene segments: implications from a chromosome with evidence of three D-JH fusions (1982) Proc. Natl. Acad. Sci. USA, 79, pp. 4118-4122; Alt, Rosenberg, Enea, Siden, Baltimore, Multiple immunoglobulin he…	Lafaille, J.J.; Howard Hughes Medical Institute, Center for Cancer Research, Department of Biology Massachusetts Institute of Technology Cambridge, MA 02139, United States								928674		CELLB	2590942	English	Cell	Article	Final		Scopus	2-s2.0-0024791338
Havran W.L., Grell S., Duwe G., Kimura J., Wilson A., Kruisbeek A.M., O'Brien R., Born W., Tigelaar R.E., Allison J.P.	7004541279;56512014700;56570286700;7202141132;7404869621;57189013675;35501495800;7101772244;7007168145;7401475344;	Limited diversity of T-cell receptor γ-chain expression of murine Thy-1+ dendritic epidermal cells revealed by V(γ)3-specific monoclonal antibody	1989	Proceedings of the National Academy of Sciences of the United States of America	86	11		4185	4189		121	10.1073/pnas.86.11.4185	https://www.scopus.com/inward/record.uri?eid=2-s2.0-2142649828&doi=10.1073%2fpnas.86.11.4185&partnerID=40&md5=00c84f470851b1fad1cbbcc3e062eb4f	Department of Microbiology and Immunology, University of California, Berkeley, CA 94720, United States	Havran, W.L., Department of Microbiology and Immunology, University of California, Berkeley, CA 94720, United States; Grell, S., Department of Microbiology and Immunology, University of California, Berkeley, CA 94720, United States; Duwe, G., Department of Microbiology and Immunology, University of California, Berkeley, CA 94720, United States; Kimura, J., Department of Microbiology and Immunolog…	To study the origin of and the degree of T-cell antigen receptor (TCR) diversity of Thy-1+ dendritic epidermal cells (Thy-1+ dECs) in mice, we have developed a monoclonal antibody (mAb 536) to the γδ TCR. mAb 536 binds to and stimulates interleukin 2 secretion from Thy-1+ dEC but not cells that express TCR composed of α and β chains. mAb 536 precipitates CD3-associated γ and δ chains from lysates…		monoclonal antibody; receptor; animal cell; epidermis; flow cytometry; hybridoma; mouse; nonhuman; priority journal; T lymphocyte; thymus; Animalia; Murinae														278424		PNASA	2726770	English	PROC. NATL. ACAD. SCI. U. S. A.	Article	Final	Open Access	Scopus	2-s2.0-2142649828
Alcalay J., Ullrich S.E., Kripke M.L.	7006120481;7102506745;7101915890;	LOCAL SUPPRESSION OF CONTACT HYPERSENSITIVITY IN MICE BY A MONOFUNCTIONAL PSORALEN PLUS UVA RADIATION	1989	Photochemistry and Photobiology	50	2		217	220		19	10.1111/j.1751-1097.1989.tb04151.x	https://www.scopus.com/inward/record.uri?eid=2-s2.0-0024710019&doi=10.1111%2fj.1751-1097.1989.tb04151.x&partnerID=40&md5=dda83ff80b590ee62cd951ba7b22f28e	Department of Immunology, University of Texas, M.D. Anderson Cancer Center, Houston, Texas, 77030, United States	Alcalay, J.; Ullrich, S.E., Department of Immunology, University of Texas, M.D. Anderson Cancer Center, Houston, Texas, 77030, United States; Kripke, M.L., Department of Immunology, University of Texas, M.D. Anderson Cancer Center, Houston, Texas, 77030, United States	Monofunctional psoralens, plus UVA radiation are not erythemogenic and are less mutagenic than bifunctional psoralens plus UVA radiation. Thus, they have received considerable attention in recent years as potential therapeutic agents for various skin diseases. The purpose of this study was to examine the immunologic side effects following treatment of mice with a monofunctional psoralen plus UVA …		angelicin; antigen; intercalating agent; psoralen derivative; animal; article; contact dermatitis; female; immunology; immunosuppressive treatment; mouse; mouse strain; PUVA; Animal; Antigens; Dermatitis, Contact; Female; Immunosuppression; Intercalating Agents; Mice; Mice, Inbred C3H; Psoralens; PUVA Therapy; Support, Non-U.S. Gov't; Support, U.S. Gov't, P.H.S.		angelicin, 523-50-2; angelicin, 523-50-2; Antigens; Intercalating Agents; Psoralens			Averbeck, D., Moustacchi, E., Decreased photo‐induced mutagenicity of mono‐functional as opposed to bi‐functional furocoumarins in yeast (1980) Photochem. Photobiol., 31, pp. 475-478; Bigby, M., Kwan, T., Sy, M.S., Ratio of Langer‐hans cells to Thy‐1+ dendritic epidermal cells in murine epidermis influences the intensity of contact hypersensitivity (1987) J. Invest. Dermatol., 84, pp. 495-499; Gu…	Alcalay, J.								318655			2780817	English	Photochem. Photobiol.	Article	Final		Scopus	2-s2.0-0024710019
Elbe A., Tschachler E., Steiner G., Binder A., Wolff K., Stingl G.	7003877845;56273310700;7201592455;8275577300;35391524200;7102655442;	Maturational steps of bone marrow-derived dendritic murine epidermal cells. Phenotypic and functional studies on Langerhans cells and Thy-1+ dendritic epidermal cells in the perinatal period	1989	Journal of Immunology	143	8		2431	2438		60		https://www.scopus.com/inward/record.uri?eid=2-s2.0-0024421790&partnerID=40&md5=89f9fe53cbad4958876def441f10533c	Division of Cutaneous Immunobiology, Department of Dermatology I, University of Vienna Medical School, A-1090 Vienna, Austria	Elbe, A., Division of Cutaneous Immunobiology, Department of Dermatology I, University of Vienna Medical School, A-1090 Vienna, Austria; Tschachler, E., Division of Cutaneous Immunobiology, Department of Dermatology I, University of Vienna Medical School, A-1090 Vienna, Austria; Steiner, G., Division of Cutaneous Immunobiology, Department of Dermatology I, University of Vienna Medical School, A-1…	The adult murine epidermis harbors two separate CD45+ bone marrow (BM)-derived dendritic cell systems, i.e., Ia+, ADPase+, Thy-1-, CD3- Langerhans cells (LC) and Ia-, ADPase-, Thy-1+, CD3+ dendritic epidermal T cells (DETC). To clarify whether the maturation of these cells from their ill-defined precursors is already accomplished before their entry into the epidermis or, alternatively, whether a …		alloantigen; cd45 antigen; Ia antigen; t lymphocyte receptor; animal cell; animal experiment; biological model; bone marrow; cell culture; cell differentiation; cytology; dendritic cell; epidermis; fetus; histochemistry; histology; langerhans cell; mouse; nonhuman; ontogeny; priority journal; Animal; Antigens, Surface; Antigens, Thy-1; Bone Marrow; Cell Differentiation; Dendritic Cells; Epidermis…		Antigens, Surface; Antigens, Thy-1; Histocompatibility Antigens Class II												221767		JOIMA	2571637	English	J. IMMUNOL.	Article	Final		Scopus	2-s2.0-0024421790
Maxfield S.R., Moulder K., Koning F., Elbe A., Stingl G., Coligan J.E., Shevach E.M., Yokoyama W.M.	6701513397;6603750103;26643588500;7003877845;7102655442;7101937287;7102804155;7004807380;	Murine T cells express a cell surface receptor for multiple extracellular matrix proteins. Identification and characterization with monoclonal antibodies	1989	Journal of Experimental Medicine	169	6		2173	2190		37	10.1084/jem.169.6.2173	https://www.scopus.com/inward/record.uri?eid=2-s2.0-0024393678&doi=10.1084%2fjem.169.6.2173&partnerID=40&md5=212fd590d76749210f74f0095e0c5c6a	Laboratory of Immunology, National Institute of Allergy and Infectious Diseases, National Institutes of Health, Bethesda, MD 20892, United States	Maxfield, S.R., Laboratory of Immunology, National Institute of Allergy and Infectious Diseases, National Institutes of Health, Bethesda, MD 20892, United States; Moulder, K., Laboratory of Immunology, National Institute of Allergy and Infectious Diseases, National Institutes of Health, Bethesda, MD 20892, United States; Koning, F., Laboratory of Immunology, National Institute of Allergy and Infe…	Cell-cell and cell-extracellular (ECM) protein interactions are mediated through heterodimers termed integrins. We have demonstrated that dendritic epidermal T cell (DETC) lines adhere to the ECM proteins, fibronectin, fibrinogen, and vitronectin but not to collagen, laminin, or control proteins. This adhesion was blocked by the tetrapeptide RGDS, but not the control peptide, RGES. We have derive…		fibrinogen; fibronectin; lymphocyte receptor; monoclonal antibody; vitronectin; animal cell; cell culture; mouse; nonhuman; priority journal; T lymphocyte activation		fibrinogen, 9001-32-5; fibronectin, 86088-83-7												221007		JEMEA	2471776	English	J. EXP. MED.	Article	Final	Open Access	Scopus	2-s2.0-0024393678
Churchill McKinney E., Streilein J.W.	6507284759;35425922200;	On the extraordinary capacity of allogeneic epidermal Langerhans cells to prime cytotoxic T cells in vivo	1989	Journal of Immunology	143	5		1560	1564		63		https://www.scopus.com/inward/record.uri?eid=2-s2.0-0024455391&partnerID=40&md5=da97664720cbe78572238236240fc143	Department of Microbiology and Immunology, University of Miami School of Medicine, Miami, FL 33101, United States	Churchill McKinney, E., Department of Microbiology and Immunology, University of Miami School of Medicine, Miami, FL 33101, United States; Streilein, J.W., Department of Microbiology and Immunology, University of Miami School of Medicine, Miami, FL 33101, United States	We have examined the relative alloimmunogenicity of monodisperse epidermal Langerhans cells (LC), Thy-1+ dendritic epidermal cells, and keratinocytes prepared from the skins of mice, using appropriate fluorescent-tagged mAb and flow cytometry. Graded doses of each cell type were inoculated i.v. and/or s.c. into allogeneic recipients that were selected on the basis of their degree of immunogenetic…		alloimmunization; animal cell; animal experiment; cell culture; cytotoxic t lymphocyte; langerhans cell; mouse; nonhuman; priority journal; skin graft; Animal; Cytotoxicity, Immunologic; Dose-Response Relationship, Immunologic; Epidermis; Histocompatibility Antigens Class I; Histocompatibility Antigens Class II; Injections, Intravenous; Isoantigens; Langerhans Cells; Lymphocyte Activation; Mice; …		Histocompatibility Antigens Class I; Histocompatibility Antigens Class II; Isoantigens												221767		JOIMA	2788187	English	J. IMMUNOL.	Article	Final		Scopus	2-s2.0-0024455391
Havran W.L., Poenie M., Tigelaar R.E., Tsien R.Y., Allison J.P.	7004541279;7003731928;7007168145;7201933927;7401475344;	Phenotypic and functional analysis of γδ T cell receptor-positive murine dendritic epidermal clones	1989	Journal of Immunology	142	5		1422	1428		36		https://www.scopus.com/inward/record.uri?eid=2-s2.0-0024512794&partnerID=40&md5=26f556342859388f02ef2ae2660554a4	Cancer Research Laboratory, University of California, Berkeley, CA 94720, United States	Havran, W.L., Cancer Research Laboratory, University of California, Berkeley, CA 94720, United States; Poenie, M., Cancer Research Laboratory, University of California, Berkeley, CA 94720, United States; Tigelaar, R.E., Cancer Research Laboratory, University of California, Berkeley, CA 94720, United States; Tsien, R.Y., Cancer Research Laboratory, University of California, Berkeley, CA 94720, Uni…	Thy-1+ dendritic cells isolated from the epidermis of normal mice (dEC)3 bear the γδ TCR associated with the CD3 complex. We have analyzed the effects of antibodies directed against the TCR complex, Ly-6C, and Thy-1, as well as pharmacological agents which have been shown to activate T cells without engagement of the TCR complex, on levels of intracellular free calcium, activation of protein kina…		lymphocyte receptor; animal cell; cell culture; dendritic cell; mouse; nonhuman; phenotype; priority journal; t lymphocyte activation; Animal; Antibodies, Monoclonal; Antibody-Dependent Cell Cytotoxicity; Clone Cells; Dendritic Cells; Enzyme Activation; Epidermis; Hamsters; Interleukin-3; Mice; Mice, Inbred AKR; Phenotype; Protein Kinase C; Receptors, Antigen, T-Cell; Receptors, Interleukin-2; Si…		Antibodies, Monoclonal; Interleukin-3; Protein Kinase C, EC 2.7.1.37; Receptors, Antigen, T-Cell; Receptors, Interleukin-2												221767		JOIMA	2783942	English	J. IMMUNOL.	Article	Final		Scopus	2-s2.0-0024512794
Augustin A., Kubo R.T., Sim G.-K.	7006616580;7103179029;7004350754;	Resident pulmonary lymphocytes expressing the γ/δ T-cell receptor	1989	Nature	340	6230		239	241		211	10.1038/340239a0	https://www.scopus.com/inward/record.uri?eid=2-s2.0-0024338318&doi=10.1038%2f340239a0&partnerID=40&md5=f14e524ce6eb21bad2cd4c67f6beb96f	Department of Medicine, National Jewish Center for Immunology and Respiratory Medicine, Denver, CO 80206, United States; Department of Microbiology and Immunology, University of Colorado Health Sciences Center, Denver, CO 80262, United States; Department of Pathology, University of Colorado Health Sciences Center, Denver, CO 80262, United States; Basel Institute for Immunology, Grenzacherstrasse …	Augustin, A., Department of Medicine, National Jewish Center for Immunology and Respiratory Medicine, Denver, CO 80206, United States, Department of Microbiology and Immunology, University of Colorado Health Sciences Center, Denver, CO 80262, United States; Kubo, R.T., Department of Medicine, National Jewish Center for Immunology and Respiratory Medicine, Denver, CO 80206, United States, Departme…	THE biological role of cells bearing the γδS T-cell antigen receptor (TCR) is as yet unclear. Although there are indications that some γδ+ cells can mediate cytotoxicity their antigen-related functions have not yet been defined. In the mouse, γδ+ ceils constitute 1-3% of T cells in lymphoid organs. Intestinal intraepithelial lymphocytes (lELs) and dendritic epidermal cells (DECs) also appear to c…		t lymphocyte receptor; animal cell; cytochemistry; cytology; histochemistry; lymphocyte; mouse; nonhuman; priority journal; Aerosols; Animal; Antibodies, Monoclonal; Antigens, Bacterial; Antigens, CD3; Antigens, CD8; Antigens, Differentiation, T-Lymphocyte; Female; Fluorescent Antibody Technique; Immunization; Immunosorbent Techniques; Lung; Lymphocyte Activation; Male; Mice; Mice, Inbred BALB C;…		Aerosols; Antibodies, Monoclonal; Antigens, Bacterial; Antigens, CD3; Antigens, CD8; Antigens, Differentiation, T-Lymphocyte; Receptors, Antigen, T-Cell			Saito, H., (1984) Nature, 309, pp. 757-762; Chien, Y., (1987) Nature, 328, pp. 677-682; Raulet, D.H., (1989) A. Rev. Immun, 7, pp. 175-207; Borst, J., (1987) Nature, 325, pp. 683-688; Brenner, M.B., (1987) Nature, 325, pp. 689-694; Goodman, T., Lefrancois, L., (1987) Nature, 325, pp. 689-694; Matis, L.A., Cron, R., Bluestone, J.A., (1987) Nature, 330, pp. 262-264; Cron, R., (1988) J. Immun, 141, …	Augustin, A.; Department of Medicine, National Jewish Center for Immunology and Respiratory Medicine, Denver, CO 80206, United States								280836			2526925	English		Article	Final		Scopus	2-s2.0-0024338318
Ferrick D.A., Sambhara S.R., Ballhausen W., Iwamoto A., Pircher H., Walker C.L., Yokoyama W.M., Miller R.G., Mak T.W.	7005918753;6701485594;7004497418;56042385500;35311784800;56405701100;7004807380;7501587830;7401931099;	T cell function and expression are dramatically altered in T cell receptor Vγ1.1Jγ4Cγ4 transgenic mice	1989	Cell	57	3		483	492		40	10.1016/0092-8674(89)90923-9	https://www.scopus.com/inward/record.uri?eid=2-s2.0-0024549629&doi=10.1016%2f0092-8674%2889%2990923-9&partnerID=40&md5=f1fa63bb39274c7e99eea50199288b70	Ontario Cancer Institute Department, Medical Biophysics University of Toronto, Toronto, M4X 1K9, Canada; Ontario Cancer Institute Department, Immunology University of Toronto, Toronto, M4X 1K9, Canada; Laboratory of Immunology National Institute of Allergy, Infectious Disease National Institutes of Health Bethesda, MD 20892, United States	Ferrick, D.A., Ontario Cancer Institute Department, Medical Biophysics University of Toronto, Toronto, M4X 1K9, Canada; Sambhara, S.R., Ontario Cancer Institute Department, Medical Biophysics University of Toronto, Toronto, M4X 1K9, Canada; Ballhausen, W., Ontario Cancer Institute Department, Medical Biophysics University of Toronto, Toronto, M4X 1K9, Canada; Iwamoto, A., Ontario Cancer Institute…	We have characterized transgenic mice carrying a functional T cell receptor (TCR) Cγ4 (Vγ1.1Jγ4Cγ4) gene. Results indicate that active transcription of the Cγ4 transgene can influence expression of the endogenous Cγ4, Cγ1 (Vγ3-, Vγ4-, Vγ2-, or Vγ5Jγ1Cγ1) and Cγ2 (Vγ1.2Jγ2Cγ2) genes, while the ultimate expression of other TCR δ, α, and β chain genes, as well as the adult T cell response, are relat…		t lymphocyte receptor; animal cell; animal experiment; dna transcription; gene expression; genetic engineering; immunoreactivity; mouse; nonhuman; priority journal; t lymphocyte; transgenic mouse; Animal; Cell Membrane; Dendrites; Gene Expression Regulation; Gene Rearrangement, gamma-Chain T-Cell Antigen Receptor; Genes, MHC Class II; Isoantigens; Mice; Mice, Transgenic; Receptors, Antigen, T-Cel…		Isoantigens; Receptors, Antigen, T-Cell			Asarnow, Kuziel, Bonyhadi, Tigelaar, Tucker, Allison, Limited diversity of γδ antigen receptor genes of Thy-1+ dendritic epidermal cells (1988) Cell, 55, pp. 837-847; Auffray, Rougeon, Purification of mouse immunoglobulin mRNAs from total myeloma tumour RNA (1980) Eur. J. Biol., 107, pp. 303-314; Bank, DePinho, Brenner, Cassimeris, Alt, Chess, A functional CD3 molecule associated with a novel het…	Ferrick, D.A.; Ontario Cancer Institute Department, Medical Biophysics University of Toronto, Toronto, M4X 1K9, Canada								928674		CELLB	2541916	English	Cell	Article	Final		Scopus	2-s2.0-0024549629
Gu S.-Q., Sakuma M., Naito S., Baba T., Uyeno K.-I.	57199703796;7102643951;55628574579;7402063585;7004630535;	The murine (C3H/He) epidermal Ia+ dendritic cells (Ia+DECs) and Thy-1+ dendritic cells (Thy-1+DECs) in contact hypersensitivity and aging	1989	Acta Dermato-Venereologica	69	1		1	5		4		https://www.scopus.com/inward/record.uri?eid=2-s2.0-0024495401&partnerID=40&md5=8476250230d1b4ffd4e4bdb49397ab6b	Department of Dermatology, 1st Teaching Hospital, China Medical University, Shen Yang, China	Gu, S.-Q., Department of Dermatology, 1st Teaching Hospital, China Medical University, Shen Yang, China; Sakuma, M., Department of Dermatology, 1st Teaching Hospital, China Medical University, Shen Yang, China; Naito, S., Department of Dermatology, 1st Teaching Hospital, China Medical University, Shen Yang, China; Baba, T., Department of Dermatology, 1st Teaching Hospital, China Medical Universit…	The contact sensitivity evaluated by the ear swelling test and the dynamic changes of epidermal Ia+ dendritic cells (Ia+DECs) and Thy-1+ dendritic cells (Thy-1+DECs) were studied in trinitrochlorobenzene (TNCB) sensitized different age group C3H/He mice after challenge. A significant increase of ear swelling was observed between 6 h and 10 days of both 8-10 week (wk) and 40-48 wk groups; the ear …		Ia antigen; thy 1 antigen; aging; animal cell; animal experiment; chlorotrinitrobenzene; dendritic cell; epidermis; histochemistry; mouse; nonhuman; priority journal; skin allergy; Aging; Animal; Antigens, Surface; Antigens, Thy-1; Cell Count; Dendritic Cells; Dermatitis, Contact; Epidermis; Fluorescent Antibody Technique; Histocompatibility Antigens Class II; Mice; Mice, Inbred C3H; Picryl Chlor…		Antigens, Surface; Antigens, Thy-1; Histocompatibility Antigens Class II; Picryl Chloride, 88-88-0												15555		ADVEA	2563601	English	ACTA DERM.-VENEREOL.	Article	Final		Scopus	2-s2.0-0024495401
Miyauchi S., Hashimoto K.	24373882100;7406196361;	Thy-1+ dendritic epidermal cells undergo mitosis in vivo	1989	Journal of Investigative Dermatology	93	3		429	431		6	10.1016/0022-202X(89)90071-7	https://www.scopus.com/inward/record.uri?eid=2-s2.0-0024463846&doi=10.1016%2f0022-202X%2889%2990071-7&partnerID=40&md5=35ec1dc1611f2866559f558b5f5b6d21	Department of Dermatology and Syphilology, Wayne State University School of Medicine, Detroit, United States; Veterans Administration, Medical Center, Allen Park, MI, United States	Miyauchi, S., Department of Dermatology and Syphilology, Wayne State University School of Medicine, Detroit, United States, Veterans Administration, Medical Center, Allen Park, MI, United States; Hashimoto, K., Department of Dermatology and Syphilology, Wayne State University School of Medicine, Detroit, United States, Veterans Administration, Medical Center, Allen Park, MI, United States	Recently, morphologic evidence that epidermal Langerhans cells (ELC) undergo a mitotic cycle in normal mouse ear skin has been presented. In the present study, using immunohistochemical staining, we examined the mitotic activity of Thy-1-positive dendritic epidermal cells (Thy-1+DEC) in the normal murine epidermis. A small number of Thy-1+DEC showed round, cleaved, paired, and paired dendritic mo…		animal cell; dendritic cell; epidermis; female; histochemistry; langerhans cell; male; mitosis; mouse; nonhuman; priority journal; Animal; Antigens, Surface; Antigens, Thy-1; Dendritic Cells; Epidermis; Female; Immunohistochemistry; Male; Mice; Microscopy, Electron; Mitosis		Antigens, Surface; Antigens, Thy-1				Hashimoto, K.; Department of Dermatology and Syphilology, Wayne State University School of Medicine, Detroit, United States								0022202X		JIDEA	2570113	English	J. Invest. Dermatol.	Article	Final	Open Access	Scopus	2-s2.0-0024463846
McConnell T.J., Yokoyama W.M., Kikuchi G.E., Einhorn G.P., Stingl G., Shevach E.M., Coligan J.E.	7006916511;7004807380;7006987358;6602491339;7102655442;7102804155;7101937287;	δ-chains of dendritic epidermal T cell receptors are diverse but pair with γ-chains in a restricted manner	1989	Journal of Immunology	142	8		2924	2931		29		https://www.scopus.com/inward/record.uri?eid=2-s2.0-0024592508&partnerID=40&md5=3e376567b6044818c607ed607d9d0412	Biological Resources Branch, National Institute of Allergy and Infectious Diseases, National Institutes of Health, Bethesda, MD 20892, United States	McConnell, T.J., Biological Resources Branch, National Institute of Allergy and Infectious Diseases, National Institutes of Health, Bethesda, MD 20892, United States; Yokoyama, W.M., Biological Resources Branch, National Institute of Allergy and Infectious Diseases, National Institutes of Health, Bethesda, MD 20892, United States; Kikuchi, G.E., Biological Resources Branch, National Institute of …	To assess the diversity of TCR δ-gene expression in dendritic epidermal T cells (DETC), we characterized the δ-gene used by a panel of cell lines that express the γδ TCR on the cell surface. Northern hybridization analyses with a panel of Vδ probes representing each of the six known Vδ families showed that each of these lines expressed either Vδ1 or Vδ6 containing transcripts. Southern hybridizat…		t lymphocyte receptor; animal cell; biological model; cell culture; cell line; controlled study; cytochemistry; dna probe; epidermis; gene expression; gene rearrangement; hybridization; mouse; nonhuman; priority journal; thymus; Animal; Base Sequence; Dendritic Cells; DNA; Gene Rearrangement, T-Lymphocyte; Mice; Mice, Inbred BALB C; Mice, Inbred C3H; Molecular Sequence Data; Receptors, Antigen, T…	GENBANK: M26447, M26448, M26449	DNA, 9007-49-2; Receptors, Antigen, T-Cell; Receptors, Antigen, T-Cell, gamma-delta												221767		JOIMA	2522971	English	J. IMMUNOL.	Article	Final		Scopus	2-s2.0-0024592508
Shiohara T., Moriya N., Gotoh C., Nagashima M.	7005668489;7004548893;6602678116;7202442789;	Both epidermal dendritic cell populations, Langerhans' cells and Thy 1+ dendritic cells are simultaneously stained by Lyt-1 monoclonal antibody	1990	Acta Dermato-Venereologica	70	1		60	62		2		https://www.scopus.com/inward/record.uri?eid=2-s2.0-0025262454&partnerID=40&md5=54ff6b9f87a7d59b714793d2342588cd	Department of Dermatology, Kyorin University, School of Medicine, 6-20-2 Shinkawa, Mitaka, Tokyo 181, Japan	Shiohara, T., Department of Dermatology, Kyorin University, School of Medicine, 6-20-2 Shinkawa, Mitaka, Tokyo 181, Japan; Moriya, N., Department of Dermatology, Kyorin University, School of Medicine, 6-20-2 Shinkawa, Mitaka, Tokyo 181, Japan; Gotoh, C., Department of Dermatology, Kyorin University, School of Medicine, 6-20-2 Shinkawa, Mitaka, Tokyo 181, Japan; Nagashima, M., Department of Dermat…	Both Langerhans' cells (LC) and Thy 1+ dendritic epidermal cells (DEC) are bone marrow-derived epidermal cells that are thought to play an important role in immune responses. Despite their several similarities, the surface phenotypes of both cells appear to be almost mutually exclusive. We found that an anti-Lyt-1.2 monoclonal antibody that recognizes solely an epitope on certain T cells can cros…		monoclonal antibody; animal cell; article; dendritic cell; epidermis; histochemistry; langerhans cell; mouse; nonhuman; priority journal; Animal; Antibodies, Monoclonal; Antigens, Surface; Antigens, Thy-1; Dendritic Cells; Epidermis; Female; Fluorescent Antibody Technique; Langerhans Cells; Mice; Mice, Inbred BALB C; Mice, Inbred C3H; Mice, Inbred C57BL		Antibodies, Monoclonal; Antigens, Surface; Antigens, Thy-1				Shiohara, T.; Department of Dermatology, Kyorin University, School of Medicine, 6-20-2 Shinkawa, Mitaka, Tokyo 181, Japan								15555		ADVEA	1967877	English	ACTA DERM.-VENEREOL.	Article	Final		Scopus	2-s2.0-0025262454
Sprecher E., Becker Y., Kraal G., Hall E., Harrison D., Shultz L.D.	7006336133;7102562278;16750417600;7401767554;7403545341;35448374300;	Effect of aging on epidermal dendritic cell populations in C57BL/6J mice	1990	Journal of Investigative Dermatology	94	2		247	253		74	10.1111/1523-1747.ep12874586	https://www.scopus.com/inward/record.uri?eid=2-s2.0-0025058197&doi=10.1111%2f1523-1747.ep12874586&partnerID=40&md5=222d7645f579db8edf2a4c144e740514	Department of Molecular Virology, Faculty of Medicine, Hebrew University, Jerusalem, Israel; Department of Histology, Free University, Amsterdam, Netherlands; The Jackson Laboratory, Bar Harbor, ME, United States	Sprecher, E., Department of Molecular Virology, Faculty of Medicine, Hebrew University, Jerusalem, Israel, Department of Histology, Free University, Amsterdam, Netherlands, The Jackson Laboratory, Bar Harbor, ME, United States; Becker, Y., Department of Molecular Virology, Faculty of Medicine, Hebrew University, Jerusalem, Israel, Department of Histology, Free University, Amsterdam, Netherlands, …	The density and function of epidermal dendritic cell populations were investigated in aged C57BL/6J mice. The densities of both Langerhans cells (LC) and Thy-1+ dendritic epidermal cells were found to decrease with age. Epidermal cell suspensions from aged mice showed impaired immunologic function as assessed in vitro by the skin-lymphocyte reaction assay and by measuring the ability of epidermal…		age; aging; animal cell; animal experiment; article; dendritic cell; epidermis; Langerhans cell; mouse; nonhuman; priority journal; T lymphocyte						Shultz, L.D.; Department of Molecular Virology, Faculty of Medicine, Hebrew University, Jerusalem, Israel								0022202X		JIDEA	2299200	English	J. Invest. Dermatol.	Article	Final	Open Access	Scopus	2-s2.0-0025058197
Sprecher E., Becker Y., Kraal G., Hall E., Shultz L.D.	7006336133;7102562278;16750417600;7401767554;35448374300;	Effect of genetically determined immunodeficiency on epidermal dendritic cell populations in C57BL/6J mice	1990	Archives of Dermatological Research	282	3		188	193		9	10.1007/BF00372621	https://www.scopus.com/inward/record.uri?eid=2-s2.0-0025264710&doi=10.1007%2fBF00372621&partnerID=40&md5=b8ca4847fa30bbba5c978613bcf23610	Department of Molecular Virology, Faculty of Medicine, Hebrew University, Jerusalem, Israel; Department of Histology, Free University, Amsterdam, Netherlands; Jackson Laboratory, Bar Harbor, 04609, Maine, United States	Sprecher, E., Department of Molecular Virology, Faculty of Medicine, Hebrew University, Jerusalem, Israel; Becker, Y., Department of Molecular Virology, Faculty of Medicine, Hebrew University, Jerusalem, Israel; Kraal, G., Department of Histology, Free University, Amsterdam, Netherlands; Hall, E., Jackson Laboratory, Bar Harbor, 04609, Maine, United States; Shultz, L.D., Jackson Laboratory, Bar H…	Mice homozygous for three different recessive mutations known to cause pleiotropic defects in the immune system and in the skin were used to evaluate the relationship between the classical immune system and dendritic epidermal cell populations. Numbers of Langerhans cells (LCs) and Thy-1+ dendritic cells (Thy-1+DEC) were determined using indirect immunofluorescence microscopy of epidermal whole m…	Dendritic cells; Immunodeficiency; Immunofluorescence microscopy; Langerhans cells	animal cell; animal experiment; article; dendritic cell; epidermis; heredity; histochemistry; immune deficiency; langerhans cell; mouse; nonhuman; priority journal; Animal; Dendritic Cells; Epidermis; Fluorescent Antibody Technique; Immune Tolerance; Langerhans Cells; Mice; Mice, Mutant Strains; Mutation; Support, Non-U.S. Gov't; Support, U.S. Gov't, Non-P.H.S.; Support, U.S. Gov't, P.H.S.					Amornsipiranitch, S., Barnes, L.M., Nordlund, J.J., Trinkle, L.S., Rheins, L.A., Immune studies in the depigmenting C57BL/Ler-vit/vit mice. An apparent isolated loss of contact hypersensitivity (1988) J Immunol, 140, pp. 3438-3445; Asarnow, D.M., Kuziel, W.A., Bunyhad, M., Tigelaar, R.E., Tucker, P.W., Allison, J.P., Limited diversity of γδ antigen receptor genes of Thy-1+ dendritic epidermal cel…	Shultz, L.D.; Jackson Laboratory, Bar Harbor, 04609, Maine, United States			Springer-Verlag					3403696		ADMFA	2196000	English	Arch Dermatol Res	Article	Final		Scopus	2-s2.0-0025264710
Aubin F., Alcalay J., Dall'Acqua F., Kripke M.L.	56232495800;7006120481;7006049951;7101915890;	Effects of a new bifunctional psoralen, 4,4',5'-trimethylazapsoralen and ultraviolet-A radiation on murine dendritic epidermal cells	1990	Photodermatology Photoimmunology and Photomedicine	7	3		123	127		2		https://www.scopus.com/inward/record.uri?eid=2-s2.0-0025119377&partnerID=40&md5=40fa76eb27c09549cdca25ccd20f2bc6	Department of Immunology, University of Texas M.D. Anderson Cancer Center, 1515 Holcombe Boulevard, Houston, TX 77030, United States	Aubin, F., Department of Immunology, University of Texas M.D. Anderson Cancer Center, 1515 Holcombe Boulevard, Houston, TX 77030, United States; Alcalay, J., Department of Immunology, University of Texas M.D. Anderson Cancer Center, 1515 Holcombe Boulevard, Houston, TX 77030, United States; Dall'Acqua, F., Department of Immunology, University of Texas M.D. Anderson Cancer Center, 1515 Holcombe Bo…	Although some psoralens are therapeutically active in the treatment of cutaneous hyperproliferative diseases when combined with UVA (320-400 nm) radiation, the toxic effects of these compounds have led physicians to seek new photochemotherapeutic agents. One such agent is 4,4',5'-trimethylazapsoralen (TMAP), a new bifunctional psoralen compound. We investigated the effects of repetitive treatment…		psoralen derivative; animal cell; animal experiment; article; dendritic cell; epidermis; histology; mouse; nonhuman; puva; topical drug administration; ultraviolet a radiation; Animal; Antigens, Surface; Antigens, Thy-1; Cell Count; Dendritic Cells; Epidermis; Female; Histocompatibility Antigens Class II; Langerhans Cells; Mice; Mice, Inbred BALB C; Psoralens; Ultraviolet Rays		4,4',5'-trimethylazapsoralen, 120482-97-5; Antigens, Surface; Antigens, Thy-1; Histocompatibility Antigens Class II; Psoralens												1089684		PPPHE	1981975	English	PHOTODERMATOL. PHOTOIMMUNOL. PHOTOMED.	Article	Final		Scopus	2-s2.0-0025119377
Ogimoto M., Yoshikai Y., Matsuzaki G., Matsumoto K., Kishihara K., Nomoto K.	6701554940;7102689561;7004661309;55471178900;7007181571;55374688300;	Expression of T cell receptor Vγ5 in the adult thymus of irradiated mice after transplantation with fetal liver cells	1990	European Journal of Immunology	20	9		1965	1970		13	10.1002/eji.1830200914	https://www.scopus.com/inward/record.uri?eid=2-s2.0-0025080776&doi=10.1002%2feji.1830200914&partnerID=40&md5=b6d1e559b82c4fb749af650811b50013	Department of Immunology, Medical Institute of Bioregulation, Kyushu University, Fukuoka, Japan	Ogimoto, M., Department of Immunology, Medical Institute of Bioregulation, Kyushu University, Fukuoka, Japan; Yoshikai, Y., Department of Immunology, Medical Institute of Bioregulation, Kyushu University, Fukuoka, Japan; Matsuzaki, G., Department of Immunology, Medical Institute of Bioregulation, Kyushu University, Fukuoka, Japan; Matsumoto, K., Department of Immunology, Medical Institute of Bior…	T cell receptor (TcR) γ/δ displays limited diversity and its diversity is distinct in different stages of ontogeny and in different anatomical sites. The Vγ5 and Vδ1 gene products are preferentially expressed on the early fetal thymocytes and on Thy‐1+ dendritic epidermal cells, whereas the Vγ4 and Vδ5 gene products are abundantly expressed on the adult thymocytes. To elucidate whether the develo…		t lymphocyte receptor; article; bone marrow transplantation; chimera; gene expression; genetic engineering; irradiation; mouse; nonhuman; priority journal; thymus; Animal; Antigens, CD4; Antigens, CD8; Antigens, Differentiation, T-Lymphocyte; Bone Marrow Transplantation; Female; Fetal Tissue Transplantation; Fetus; Hematopoietic Stem Cells; Liver; Liver Transplantation; Mice; Mice, Inbred AKR; Mi…		Antigens, CD4; Antigens, CD8; Antigens, Differentiation, T-Lymphocyte; Receptors, Antigen, T-Cell			Miller, J.F.A.P., Osoba, D., (1967) Physiol. Rev., 47, p. 437; Fowlkes, B.J., Pardoll, D.M., (1989) Adv. Immunol., 44, p. 207; Yanagi, Y.Y., Yoshikai, Y., Leggett, K., Clark, S.P., Aleksander, I., Mak, T.W., (1984) Nature, 308, p. 145; Hendrick, S.M., Cohen, D.I., Nielsen, E.I., Davis, M.M., (1984) Nature, 308, p. 149; Chien, Y.‐H., Becker, D.M., Lindsten, T., Okumura, A., Cohen, D.I., Davis, M.M…	Yoshikai, Y.; Department of Immunology, Medical Institute of Bioregulation, Kyushu University, 3-1-1, Maidashi, Higashi-Ku, Fukuoka, 812, Japan								142980			2120069	English	Eur. J. Immunol.	Article	Final		Scopus	2-s2.0-0025080776
Shimada S., Caughman S.W., Bluestone J.A., Cron R.Q., Owen F.L., Smith J.A., Katz S.I.	7402762452;57192932489;7102428768;7004339666;7102748459;7410169247;7403462507;	Freshly isolated Thy-1+ dendritic epidermal cells express T cell receptor γδ-CD3	1990	Journal of Dermatological Science	1	6		459	464		5	10.1016/0923-1811(90)90017-8	https://www.scopus.com/inward/record.uri?eid=2-s2.0-0025242549&doi=10.1016%2f0923-1811%2890%2990017-8&partnerID=40&md5=fce3ec6e4b7b313fd1832f141a5ccf6a	Dermatology and Transplantation Biology Section, Immunology Branches, National Cancer Institute, Bethesda, MD, United States; Cancer Research Center, Tufts Medical School, Boston, MA, United States; Department of Pathology, Harvard Medical School, Massachusetts General Hospital, Boston, MA, United States; Department of Molecular Biology and Pathology, Massachusetts General Hospital, Boston, MA, U…	Shimada, S.; Caughman, S.W.; Bluestone, J.A., Dermatology and Transplantation Biology Section, Immunology Branches, National Cancer Institute, Bethesda, MD, United States; Cron, R.Q., Dermatology and Transplantation Biology Section, Immunology Branches, National Cancer Institute, Bethesda, MD, United States; Owen, F.L., Cancer Research Center, Tufts Medical School, Boston, MA, United States; Smit…	Within murine epidermis exists a population of Thy-1+ DEC which express membrane Thy-1 antigen, but lack CD8 or CD4 antigen. We examined freshly obtained non-cultured Thy-1+ DEC both by immunofluorescence and by biochemical techniques to identify the protein products of the T cell receptor (TCR) and the associated CD3 complex on these cells. Virtually all of the Thy-1+ DEC are brightly positive i…	Epidermal immune system; T cell receptor; Thy-1+ dendritic epidermal cells	cd3 antigen; t lymphocyte receptor; animal experiment; animal tissue; article; dendritic cell; epidermis; immune system; mouse; nonhuman; Amino Acid Sequence; Animal; Antigens, CD3; Antigens, CD4; Antigens, CD8; Antigens, Differentiation, T-Lymphocyte; Antigens, Surface; Antigens, Thy-1; Dendritic Cells; Mice; Mice, Inbred Strains; Molecular Sequence Data; Phenotype; Receptors, Antigen, T-Cell; R…		Antigens, CD3; Antigens, CD4; Antigens, CD8; Antigens, Differentiation, T-Lymphocyte; Antigens, Surface; Antigens, Thy-1; Receptors, Antigen, T-Cell; Receptors, Antigen, T-Cell, gamma-delta			Tschachler, Schuler, Hutterer, Leibl, Wolff, Stingl, Expression of Thy-1 antigen by murine epidermal cells (1983) J Invest Dermatol, 81, pp. 282-286; Bergstresser, Tigelaar, Dees, Streilein, Thy-1 antigen-bearing dendritic cells populate murine epidermis (1983) J Invest Dermatol, 81, pp. 286-288; Breathnach, Katz, Thy-1+ dendritic cells in murine epidermis are bone marrow-derived (1984) J Invest …									9231811		JDSCE	1981147	English	J. Dermatol. Sci.	Article	Final		Scopus	2-s2.0-0025242549
Itohara S., Farr A.G., Lafaille J.J., Bonneville M., Takagaki Y., Haas W., Tonegawa S.	7006304339;7004995183;7004050262;7006414182;7101636598;7102876872;56243320800;	Homing of a γδ thymocyte subset with homogeneous T-cell receptors to mucosal epithelia	1990	Nature	343	6260		754	757		405	10.1038/343754a0	https://www.scopus.com/inward/record.uri?eid=2-s2.0-0025019254&doi=10.1038%2f343754a0&partnerID=40&md5=a46956d02d6e57b19d7ec0bd76dd3c7e	Hoffman La Roche Co. Ltd., Grenzacherstrasse 487, CH-4005 Basel, Switzerland	Itohara, S.; Farr, A.G.; Lafaille, J.J.; Bonneville, M.; Takagaki, Y.; Haas, W., Hoffman La Roche Co. Ltd., Grenzacherstrasse 487, CH-4005 Basel, Switzerland; Tonegawa, S.	In mice γδ T-cell populations with distinct T-cell receptor (TCR) repertoires and homing properties have been identified. Diversified populations are found in lymphoid organs1-3 and intestinal epithelia4,5. By contrast, the γδ T-cells Is that have been found in the murine skin are homogeneous. They express a TCR consisting of one particular Vγ5 and one particular V81 chain5,6 and seem to originat…		Murinae; Animalia; t lymphocyte receptor; animal cell; article; lymphocyte homing; mouse; nonhuman; priority journal; t lymphocyte subpopulation; thymocyte; Animal; Base Sequence; Comparative Study; Epithelial Cells; Female; Gene Rearrangement, gamma-Chain T-Cell Antigen Receptor; Immunohistochemistry; Intestines; Leukocyte Count; Mice; Mice, Inbred BALB C; Molecular Sequence Data; Mucous Membran…		Receptors, Antigen, T-Cell			Elliott, J.F., Rock, E.P., Patten, P.A., David, M.M., Chien, Y.-H., (1988) Natur, 331, pp. 627-631; Lacy, M.J., McNeil, L.K., Roth, M.E., Kranz, D.M., (1989) Proc. natn. Acad. Sci. U.S.A, 86, pp. 1023-1026; Takagaki, Y., Nakanishi, N., Ishida, I., Kanagawa, O., Tonegawa, S., (1989) J. Immun, 142, pp. 2112-2121; Takagaki, Y., DeCloux, A., Bonneville, M., Tonegawa, S., (1989) Natur, 339, pp. 712-71…									280836			2154700	English		Article	Final		Scopus	2-s2.0-0025019254
Larsen C.P., Steinman R.M., Witmer-Pack M., Hankins D.F., Morris P.J., Austyn J.M.	26430431500;7202375022;6603594979;35587707200;56455824300;7003382238;	Migration and maturation of langerhans cells in skin transplants and explants	1990	Journal of Experimental Medicine	172	5		1483	1493		541	10.1084/jem.172.5.1483	https://www.scopus.com/inward/record.uri?eid=2-s2.0-0025130986&doi=10.1084%2fjem.172.5.1483&partnerID=40&md5=9664deba404922b63b5e9c4c25029c0c	Nuffteld Department of Surgery, University of Oxford, John Raddiffe Hospital, Headington, Oxford, OX3 9DU, United Kingdom; Rockefeller University, Irvington Institute, New York, NY, 10021, United States	Larsen, C.P., Nuffteld Department of Surgery, University of Oxford, John Raddiffe Hospital, Headington, Oxford, OX3 9DU, United Kingdom; Steinman, R.M., Nuffteld Department of Surgery, University of Oxford, John Raddiffe Hospital, Headington, Oxford, OX3 9DU, United Kingdom, Rockefeller University, Irvington Institute, New York, NY, 10021, United States; Witmer-Pack, M., Nuffteld Department of Su…	The behavior of Langerhans cells (LC) has been examined after skin transplantation and in an organ culture system. Within 24 h (and even within 4 h of culture), LC in epidermal sheets from allografts, isografts, and explants dramatically increased in size and expression of major histocompatibility complex class II molecules, and their numbers were markedly decreased. Using a new procedure, dermal…		animal cell; animal experiment; animal model; article; cell maturation; cell migration; graft rejection; langerhans cell; mouse; nonhuman; organ culture; priority journal; skin transplantation; Animal; Cell Differentiation; Cell Movement; Epidermis; Fluorescent Antibody Technique; Histocompatibility Antigens Class II; Immunohistochemistry; Langerhans Cells; Male; Mice; Phenotype; Skin Transplanta…		Histocompatibility Antigens Class II			Inaba, K., Steinman, R.M., Resting and sensitized T lymphocytes exhibit distinct stimulatory requirements for growth and lymphokine release (1984) J. Exp Med., 160, p. 1711; Hart, D.N.J., Fabre, J.W., Demonstration and characterization of la-positive dendritic cells in the interstitial connective tissues of rat heart and other tissues, but not brain (1981) J. Exp Med., 153, p. 347; Austyn, J.M., …	Austyn, J.; Nuffteld Department of Surgery, John Raddiffe Hospital, Headington, Oxford, OX3 9DU, United Kingdom								221007			2230654	English	J. Exp. Med.	Article	Final	Open Access	Scopus	2-s2.0-0025130986
Welsh E.A., Kripke M.L.	35862917600;7101915890;	Murine Thy-1+ dendritic epidermal cells induce immunologic tolerance in vivo	1990	Journal of Immunology	144	3		883	891		32		https://www.scopus.com/inward/record.uri?eid=2-s2.0-0025062282&partnerID=40&md5=d24d26d59e029775fe6a4132a8bf3afa	Department of Immunology, University of Texas, M. D. Anderson Cancer Center, Houston, TX 77030, United States; Department of Immunology - 178, M.D. Anderson Cancer Center, 1515 Holcombe Blvd., Houston, TX 77030, United States	Welsh, E.A., Department of Immunology, University of Texas, M. D. Anderson Cancer Center, Houston, TX 77030, United States; Kripke, M.L., Department of Immunology, University of Texas, M. D. Anderson Cancer Center, Houston, TX 77030, United States, Department of Immunology - 178, M.D. Anderson Cancer Center, 1515 Holcombe Blvd., Houston, TX 77030, United States	To study the potential immunologic functions of murine Thy-1+ dendritic epidermal cells (Tdec), we used long term, IL-2-dependent, Tdec lines derived from the skin of C3H mice. Cells of the Tdec lines AU16 or AU4 were conjugated in vitro with the hapten FITC and injected s.c. into the footpad (ifp.) or i.v. into syngeneic recipient mice to assess their ability to induce or inhibit contact hyperse…		animal cell; animal experiment; animal model; article; cell culture; cell line; dendritic cell; epidermis cell; immunization; immunological tolerance; mouse; nonhuman; priority journal; skin; Animal; Antigens, Surface; Antigens, Thy-1; Dendritic Cells; Dinitrofluorobenzene; Epidermis; Flow Cytometry; Fluorescein-5-isothiocyanate; Fluoresceins; Graft vs Host Reaction; H-2 Antigens; Haptens; Immune…		Antigens, Surface; Antigens, Thy-1; Dinitrofluorobenzene, 70-34-8; Fluorescein-5-isothiocyanate, 3326-32-7; Fluoresceins; H-2 Antigens; Haptens; Receptors, Antigen, T-Cell; Thiocyanates				Kripke, M.L.; Department of Immunology - 178, M.D. Anderson Cancer Center, 1515 Holcombe Blvd., Houston, TX 77030, United States								221767		JOIMA	1967278	English	J. Immunol.	Article	Final		Scopus	2-s2.0-0025062282
Havran W.L., Allison J.P.	7004541279;7401475344;	Origin of Thy-1+ dendritic epidermal cells of adult mice from fetal thymic precursors	1990	Nature	344	6261		68	70		195	10.1038/344068a0	https://www.scopus.com/inward/record.uri?eid=2-s2.0-0025166299&doi=10.1038%2f344068a0&partnerID=40&md5=7b239fee0299c01983c43f3af5f92e3d	Division of Immunology, Department of Molecular and Cell Biology, University of California, Berkeley, CA 94720, United States	Havran, W.L., Division of Immunology, Department of Molecular and Cell Biology, University of California, Berkeley, CA 94720, United States; Allison, J.P., Division of Immunology, Department of Molecular and Cell Biology, University of California, Berkeley, CA 94720, United States	THE skin of mice contains dendritic epidermal cells carrying the Thy-1 antigen (Thy-1+ dEC) which express antigen receptors composed of the T-cell antigen receptor (TCR) γ- and δ-chains1-5. Although the role of the thymus in the generation of most T cells is well established6, the involvement of the thymus in the generation of Thy-1+ dEC is not clear. Because bone marrow cells can give rise to Th…		age; animal experiment; article; bone marrow; dendritic cell; epidermis cell; fetus; mouse; nonhuman; priority journal; thymus; Animal; Animals, Newborn; Antigens, Surface; Antigens, Thy-1; Dendritic Cells; Epidermis; Mice; Mice, Inbred BALB C; Mice, Nude; Receptors, Antigen, T-Cell; Receptors, Antigen, T-Cell, gamma-delta; Support, Non-U.S. Gov't; Support, U.S. Gov't, P.H.S.; Thymus Gland; Anima…		Antigens, Surface; Antigens, Thy-1; Receptors, Antigen, T-Cell; Receptors, Antigen, T-Cell, gamma-delta			Bonyhadi, M., Weiss, A., Tucker, P.W., Tigelaar, R.E., Allison, J.P., (1987) Nature, 330, pp. 574-576; Kuziel, W.A., (1987) Nature, 328, pp. 263-266; Stingl, G., (1987) Proc. natn. Acad Sci. U.S.A, 84, pp. 2430-2434; Yokoyama, W.M., (1987) J. exp. Med, 165, pp. 1725-1730; Koning, F., (1987) Science, 236, pp. 834-837; Fowlkes, B.J., Pardoll, D.M., (1989) Adv. Immun, 44, pp. 207-264; Bergstresser, …	Havran, W.L.; Division of Immunology, Department of Molecular and Cell Biology, University of California, Berkeley, CA 94720, United States								280836			1968230	English		Article	Final		Scopus	2-s2.0-0025166299
Cumberbatch M., Kimber I.	7004800568;25026048300;	Phenotypic characteristics of antigen-bearing cells in the draining lymph nodes of contact sensitized mice	1990	Immunology	71	3		404	410		61		https://www.scopus.com/inward/record.uri?eid=2-s2.0-0025200919&partnerID=40&md5=f0c7f38dc2cca31bef1c341cb6b5397c	Immunology Group, ICI Central Toxicology Lab., Alderley Park, Macclesfield SK10 4TJ, United Kingdom	Cumberbatch, M., Immunology Group, ICI Central Toxicology Lab., Alderley Park, Macclesfield SK10 4TJ, United Kingdom; Kimber, I., Immunology Group, ICI Central Toxicology Lab., Alderley Park, Macclesfield SK10 4TJ, United Kingdom	Following contact sensitization of mice there is a rapid accumulation of dendritic cells (DC) within lymph nodes during the site of exposure. Previous studies have revealed that cells bearing high levels of contact allergen can also be identified within the low buoyant density fraction of draining lymph node cells, and it has been assumed that the majority of these are DC. The purpose of the pres…		animal experiment; animal tissue; article; contact sensitization; dendritic cell; epidermis; immunofluorescence; lymph node; mouse; nonhuman; phenotype; priority journal; Adenosinetriphosphatase; Animal; Antigen-Presenting Cells; Antigens, Surface; Antigens, Thy-1; Dendritic Cells; Dermatitis, Contact; Fluorescent Antibody Technique; Histocompatibility Antigens Class II; Lymph Nodes; Lymphocyte A…		Adenosinetriphosphatase, EC 3.6.1.3; Antigens, Surface; Antigens, Thy-1; Histocompatibility Antigens Class II				Cumberbatch, M.; Immunology Group, ICI Central Toxicology Lab., Alderley Park, Macclesfield SK10 4TJ, United Kingdom								192805		IMMUA	1980121	English	IMMUNOLOGY	Article	Final		Scopus	2-s2.0-0025200919
Itohara S., Tonegawa S.	7006304339;56243320800;	Selection of γδ T cells with canonical T-cell antigen receptors in fetal thymus	1990	Proceedings of the National Academy of Sciences of the United States of America	87	20		7935	7938		53	10.1073/pnas.87.20.7935	https://www.scopus.com/inward/record.uri?eid=2-s2.0-0025151983&doi=10.1073%2fpnas.87.20.7935&partnerID=40&md5=cda51f927eb7acd75ae698398c40c246	Howard Hughes Med. Inst. Ctr. C. R., Department of Biology, Massachusetts Inst. of Technology, Cambridge, MA 02139, United States	Itohara, S., Howard Hughes Med. Inst. Ctr. C. R., Department of Biology, Massachusetts Inst. of Technology, Cambridge, MA 02139, United States; Tonegawa, S., Howard Hughes Med. Inst. Ctr. C. R., Department of Biology, Massachusetts Inst. of Technology, Cambridge, MA 02139, United States	Two γδ T-cell subsets that are generated in the fetal thymus and selectively localize in epidermis and uterus-vagina-tongue epithelia exhibit remarkable homogeneity in their (T-cell) antigen receptors (TCR). In the present study, we show that cells expressing the canonical γδ TCR are also generated in fetal thymus organ cultures. Treatment of these cultures with anti-γδ TCR antibodies did not pre…	Mouse; Polymerase chain reaction; Positive selection; T-cell receptor γδ	t lymphocyte receptor; animal cell; article; genetic engineering; mouse; nonhuman; polymerase chain reaction; priority journal; t lymphocyte subpopulation; thymus; Animal; Antibodies, Monoclonal; Base Sequence; Cloning, Molecular; DNA; Fetus; Macromolecular Systems; Mice; Mice, Inbred C57BL; Molecular Sequence Data; Organ Culture; Polymerase Chain Reaction; Receptors, Antigen, T-Cell; Support, No…		Antibodies, Monoclonal; DNA, 9007-49-2; Macromolecular Systems; Receptors, Antigen, T-Cell			Havran, W.L., Allison, J.P., (1988) Nature (London), 335, pp. 443-445; Ito, K., Bonneville, M., Takagaki, Y., Nakanishi, N., Kanagawa, O., Krecko, E.G., Tonegawa, S., (1989) Proc. Natl. Acad. Sci. USA, 86, pp. 631-635; Lafaille, J.J., DeCloux, A., Bonneville, M., Takagaki, Y., Tonegawa, S., (1989) Cell, 59, pp. 859-870; Lafaille, J.J., Haas, W., Coutinho, A., Tonegawa, S., (1990) Immunol. Today, …	Itohara, S.; Howard Hughes Med. Inst. Ctr. C. R., Department of Biology, Massachusetts Inst. of Technology, Cambridge, MA 02139, United States			National Academy of Sciences					278424		PNASA	2236011	English	Proc. Natl. Acad. Sci. U. S. A.	Article	Final	Open Access	Scopus	2-s2.0-0025151983
Ohashi P.S., Wallace V.A., Broughton H., Ohashi C.T., Ferrick D.A., Jost V., Mak T.W., Hengartner H., Pircher H.	7006493798;57198270739;7005464872;16212738600;7005918753;6701757229;7401931099;7102555060;35311784800;	Specific deletion of the J‐Cδ locus in murine α/β T cell clones and studies using transgenic mice	1990	European Journal of Immunology	20	3		517	522		9	10.1002/eji.1830200309	https://www.scopus.com/inward/record.uri?eid=2-s2.0-0025361326&doi=10.1002%2feji.1830200309&partnerID=40&md5=168eff3355dfd20f0bab260f912d8baa	Institute of Pathology, Department of Experimental Pathology, University Hospital, Zürich, Switzerland; The Ontario Cancer Institute, Department of Medical Biophysics and Immunology, University of Toronto, Toronto, Canada	Ohashi, P.S., The Ontario Cancer Institute, Department of Medical Biophysics and Immunology, University of Toronto, Toronto, Canada; Wallace, V.A., The Ontario Cancer Institute, Department of Medical Biophysics and Immunology, University of Toronto, Toronto, Canada; Broughton, H., The Ontario Cancer Institute, Department of Medical Biophysics and Immunology, University of Toronto, Toronto, Canada…	A deletion event in the T cell receptor (TcR) δ locus has been characterized in a panel of mouse α/β cytotoxic T lymphocyte (CTL) clones. Data presented here shows that Jδ1, Jδ2 and Cδ are absent from functional CTL clones while a germ‐line Dδ1 fragment is retained, thus suggesting a specific deletion of this region. We have investigated the possible significance of the J‐Cδ deletion by generatin…		animal cell; animal experiment; animal model; article; clone; cytotoxic t lymphocyte; genetic engineering; mouse; nonhuman; ontogeny; priority journal; t lymphocyte; transgenic mouse; Animal; Blotting, Southern; Cell Differentiation; Cell Line; Chromosome Deletion; Gene Rearrangement, T-Lymphocyte; Mice; Mice, Transgenic; Receptors, Antigen, T-Cell; Support, Non-U.S. Gov't; T-Lymphocytes, Cytotox…		Receptors, Antigen, T-Cell			Davis, M.M., Bjorkman, P.J., (1988) Nature, 334, p. 395; Toyonaga, B., Mak, T.W., (1987) Annu. Rev. Immunol., 5, p. 585; Dembi?, Z., Haas, W., Weiss, S., McCubrey, J., Kiefer, H., Von Boehmer, H., Steinmetz, M., (1986) Nature, 320, p. 232; Gabert, J., Langlet, C., Zamoyska, R., Parnes, J.R., Schmitt‐Verhulst, A.‐M., Malissen, B., (1987) Cell, 50, p. 545; Raulet, D.H., (1989) Nature, 339, p. 342; …	Ohashi, P.S.; Department of Experimental Pathology, University Hospital, Zürich, CH-8091, Switzerland								142980			2318248	English	Eur. J. Immunol.	Article	Final		Scopus	2-s2.0-0025361326
Pircher H., Ohashi P., Miescher G., Lang R., Zikopoulos A., Bürki K., Mak T.W., Robson MacDonald H., Hengartner H.	35311784800;7006493798;6701406025;16459400500;6506085117;7006397897;7401931099;6603068556;7102555060;	T cell receptor (TcR) β chain transgenic mice: Studies on allelic exclusion and on the TcR+ γ/δ population	1990	European Journal of Immunology	20	2		417	424		20	10.1002/eji.1830200227	https://www.scopus.com/inward/record.uri?eid=2-s2.0-0025058127&doi=10.1002%2feji.1830200227&partnerID=40&md5=dd1abf98c08c1dd1b1e8445de8ff6b48	Institute of Pathology, Department of Experimental Pathology, University Hospital, Zürich, Switzerland; Ludwig Institute for Cancer Research, Lausanne Branch, Epalinges, Switzerland; Department of Preclinical Research, Pharmaceutical Division, Sandoz Ltd., Basel, Switzerland; The Ontario Cancer Institute, Department of Biophysics and Immunology, University of Toronto, Toronto, Canada	Pircher, H., Institute of Pathology, Department of Experimental Pathology, University Hospital, Zürich, Switzerland, The Ontario Cancer Institute, Department of Biophysics and Immunology, University of Toronto, Toronto, Canada; Ohashi, P., Institute of Pathology, Department of Experimental Pathology, University Hospital, Zürich, Switzerland; Miescher, G., Ludwig Institute for Cancer Research, Lau…	To study allelic exclusion of TcR genes we analyzed two types (I and II) of TcR β transgenic mice. T cells derived from both types of mice contained similar amounts of transgenic RNA transcripts; however, surface expression of the transgenic β chain was drastically reduced in type II compared to type I. In type I transgenic mice, productive rearrangements and expression of endogenous TcR β genes …		t lymphocyte receptor; allele; animal cell; animal experiment; animal model; article; cell culture; gene rearrangement; genetic engineering; mouse; nonhuman; priority journal; transgenic mouse; Alleles; Animals; Antigens, CD3; Antigens, Differentiation, T-Lymphocyte; Antigens, Surface; Antigens, Thy-1; Blotting, Northern; Flow Cytometry; Gene Expression Regulation; Gene Rearrangement, T-Lymphocyt…		Antigens, CD3; Antigens, Differentiation, T-Lymphocyte; Antigens, Surface; Antigens, Thy-1; Receptors, Antigen, T-Cell; Receptors, Antigen, T-Cell, alpha-beta; Receptors, Antigen, T-Cell, gamma-delta			Hozumi, N., Tonegawa, S., (1976) Proc. Natl. Acad. Sci. USA, 73, p. 3628; Davis, M.M., Bjorkman, P.J., (1988) Nature, 334, p. 395; Pernis, B., Chiappino, G., Kelus, A.S., Gell, P.G.H., (1965) J. Exp. Med., 122, p. 853; Cerba, J.J., Colberg, J.E., Dray, S., RABBIT LYMPHOID CELLS DIFFERENTIATED WITH RESPECT TO alpha-, gamma-, AND ?- HEAVY POLYPEPTIDE CHAINS AND TO ALLOTYPIC MARKERS AA1 AND AA2 (196…	Hengartner, H.; Institut Für Pathologie, Sternwartstr. 2, Zürich, CH-8091, Switzerland								142980			1968840	English	Eur. J. Immunol.	Article	Final		Scopus	2-s2.0-0025058127
Dupuy P., Heslan M., Fraitag S., Hercend T., Dubertret L., Bagot M.	7004445018;6602735626;7005944860;7007066517;7102945606;7006983278;	T-cell receptor-γ/δ bearing lymphocytes in normal and inflammatory human skin	1990	Journal of Investigative Dermatology	94	6		764	768		61	10.1111/1523-1747.ep12874626	https://www.scopus.com/inward/record.uri?eid=2-s2.0-0025348508&doi=10.1111%2f1523-1747.ep12874626&partnerID=40&md5=8b329325b156bc5d735d2af8409593b4	Laboratoire de Dermatologie, INSERM U.312, et d'Anatomo-Pathologie Villejuif, France, France; Hopital Henri-Mondor, Créteil, Laboratoire d'Immunologie Cellulaire Institut Gustave-Roussy, Villejuif, France	Dupuy, P.; Heslan, M.; Fraitag, S., Laboratoire de Dermatologie, INSERM U.312, et d'Anatomo-Pathologie Villejuif, France, France; Hercend, T., Hopital Henri-Mondor, Créteil, Laboratoire d'Immunologie Cellulaire Institut Gustave-Roussy, Villejuif, France; Dubertret, L.; Bagot, M.	Murine dendritic epidermal T cells (DETC) were recently reported to express T-cell receptor (TCR)-γ/δ chains. In a search for the human equivalent of these cells, we tested normal and lesional skin with MoAb which react with the TCR-γ/δ heterodimer. We performed indirect immunofluorescence (IF) on epidermal sheets, and alkalinephosphatase-anti-alkaline-phosphatase complex (APAAP) on epidermal cel…		t lymphocyte receptor; article; clinical article; dermatitis; histochemistry; human; human cell; inflammation; lymphocyte; priority journal; Antibodies, Monoclonal; Dermatitis; Human; Lymphocytes; Receptors, Antigen, T-Cell; Receptors, Antigen, T-Cell, gamma-delta; Reference Values; Skin; T-Lymphocytes		Antibodies, Monoclonal; Receptors, Antigen, T-Cell; Receptors, Antigen, T-Cell, gamma-delta												0022202X		JIDEA	2141342	English	J. Invest. Dermatol.	Article	Final	Open Access	Scopus	2-s2.0-0025348508
Tigelaar R.E., Lewis J.M., Bergstresser P.R.	7007168145;55483972600;7007054829;	TCR γ δ+ dendritic epidermal T cells as constituents of skin-associated lymphoid tissue	1990	Journal of Investigative Dermatology	94	6 SUPPL.		S58	S63		47		https://www.scopus.com/inward/record.uri?eid=2-s2.0-0025336158&partnerID=40&md5=47cdff6312e5161ead831b5609939f36	Department of Dermatology, the Graduate Program in Immunology, University of Texas, Dallas, TX, United States	Tigelaar, R.E., Department of Dermatology, the Graduate Program in Immunology, University of Texas, Dallas, TX, United States; Lewis, J.M., Department of Dermatology, the Graduate Program in Immunology, University of Texas, Dallas, TX, United States; Bergstresser, P.R., Department of Dermatology, the Graduate Program in Immunology, University of Texas, Dallas, TX, United States	The epidermis of all strains of normal mice is populated by two distinct dendritic, bone marrow-derived cells: Langerhans cells and CD4-CD8- Thy-1+ dendritic epidermal T cells (DETC). The overwhelming majority of DETC are an unusually homogeneous population of thymic-dependent cells which express CD3-associated T-cell antigen receptors (TCRs) of the γ/δ type, thereby distinguishing them from conv…		t lymphocyte receptor; animal cell; conference paper; dendritic cell; mouse; priority journal; skin cell; Animal; Antigens; Antigens, CD; Antigens, Surface; Antigens, Thy-1; Dendritic Cells; Epidermis; Human; Lymphoid Tissue; Receptors, Antigen, T-Cell; Receptors, Antigen, T-Cell, alpha-beta; Receptors, Antigen, T-Cell, gamma-delta; Skin; Support, Non-U.S. Gov't; Support, U.S. Gov't, P.H.S.; T-Ly…		Antigens; Antigens, CD; Antigens, Surface; Antigens, Thy-1; Receptors, Antigen, T-Cell; Receptors, Antigen, T-Cell, alpha-beta; Receptors, Antigen, T-Cell, gamma-delta				Tigelaar, R.E.; Department of Dermatology, the Graduate Program in Immunology, University of Texas, Dallas, TX, United States								0022202X		JIDEA	1972173	English	J. Invest. Dermatol.	Article	Final		Scopus	2-s2.0-0025336158
Kobata T., Shinkai Y., Ligo Y., Kawasaki A., Yagita H., Ito S., Shlmada S., Katz S.I., Okumura K.	55813589600;7004815423;6506344503;7102376029;55192275000;57198347031;36498347700;7403462507;55892223000;	Thy-1 -positive dendritic epidermal cells contain a killer protein perforin	1990	International Immunology	2	11		1113	1116		13	10.1093/intimm/2.11.1113	https://www.scopus.com/inward/record.uri?eid=2-s2.0-0025064909&doi=10.1093%2fintimm%2f2.11.1113&partnerID=40&md5=ad9550c5c7562b95b5c5af1bd7accd9f	Department of Immunology, Juntendo University School of Medicine, 2-1-1 Hongo, Bunkyo-ku, Tokyo 113, Japan; Tokyo Research Laboratories, Kyowa Hakko Kogyo Co. Ltd, 3-6-6 Asahi-machi, Machida-shi, Tokyo 194, Japan; Department of Dermatology, Yamanashi Medical College, Tamaho-cho, Nakakoma-gun, Yamanashi 409-38, Japan; Dermatology Branch, NIH, Bethesda, MD 20892, United States	Kobata, T., Department of Immunology, Juntendo University School of Medicine, 2-1-1 Hongo, Bunkyo-ku, Tokyo 113, Japan; Shinkai, Y., Department of Immunology, Juntendo University School of Medicine, 2-1-1 Hongo, Bunkyo-ku, Tokyo 113, Japan; Ligo, Y., Department of Immunology, Juntendo University School of Medicine, 2-1-1 Hongo, Bunkyo-ku, Tokyo 113, Japan; Kawasaki, A., Department of Immunology, …	The killer cell characteristics of Thy-1-positive dendritic epidermal cells (Thy-1+ DEC) were examined. Four Thy-1 + DEC clones which were established from athymic nude mice exhibited spontaneous or lectin-redirectable cytotoxic activity against some murine tumor cell lines In a 4 h 51Cr-release assay. A colorimetric assay for benzyloxycarbonyl-L-lysine-thiobenzyl ester esterase revealed a strong…	Perforin; Serine esterase; Thy-1-positive dendritic epidermal cells	perforin; serine proteinase; animal cell; article; cell culture; dendritic cell; epidermis cell; genetic engineering; mouse; nonhuman; priority journal; Animal; Antigens, Surface; Antigens, Thy-1; Clone Cells; Cytotoxicity, Immunologic; Dendritic Cells; DNA; Killer Cells; Membrane Proteins; RNA, Messenger; Support, Non-U.S. Gov't; Tumor Cells, Cultured		perforin, 119332-27-3; serine proteinase, 37259-58-8; Antigens, Surface; Antigens, Thy-1; DNA, 9007-49-2; Membrane Proteins; perforin, 126465-35-8; RNA, Messenger			Tschachler, E., Schuler, G., Hutterer, J., Lelbl, H., Wolff, K., Stingl, G., Expression of Thy-1 antigen by murine epidermal cells (1983) J. Invest. Dermatol, 81, p. 282; Bergstresser, P.R., Tigelaar, R.E., Dees, J.H., Streilem, J.W., Thy-1 antigen-bearing dendritic epidermal ceils populate murine epidermis (1983) J. Invest. Dermatol, 81, p. 286; Brealhnach, S.M., Katz, S.I., Thy-1 + dendritic ce…	Okumura, K.; Department of Immunology, Juntendo University School of Medicine, 2-1-1 Hongo, Bunkyo-ku, Tokyo 113, Japan								9538178		INIME	1982066	English	Int. Immunol.	Article	Final		Scopus	2-s2.0-0025064909
Honjo M., Elbe A., Steiner G., Assmann I., Wolff K., Stingl G.	57196923915;7003877845;7201592455;7006742429;35391524200;7102655442;	Thymus-independent generation of Thy-1+ epidermal cells from a pool of Thy-1- bone marrow precursors	1990	Journal of Investigative Dermatology	95	5		562	567		12	10.1111/1523-1747.ep12505543	https://www.scopus.com/inward/record.uri?eid=2-s2.0-0025223856&doi=10.1111%2f1523-1747.ep12505543&partnerID=40&md5=7add58f30597e4d1c48b7ea8af44a7be	Division of Cutaneous Immunobiology, University of Vienna Medical School, Vienna, Austria; Department of Dermatology I, University of Vienna Medical School, Vienna, Austria	Honjo, M., Division of Cutaneous Immunobiology, University of Vienna Medical School, Vienna, Austria; Elbe, A., Division of Cutaneous Immunobiology, University of Vienna Medical School, Vienna, Austria; Steiner, G., Division of Cutaneous Immunobiology, University of Vienna Medical School, Vienna, Austria; Assmann, I., Division of Cutaneous Immunobiology, University of Vienna Medical School, Vienn…	Thy-1+ dendritic epidermal cells (Thy-1+ DEC) and immature thymocytes share several phenotypic features: CD45+, Thy-1+, asialo-GM1+, CD3+, CD4-, and CD8-. In view of this similarity, it has been suggested that the epidermis may be a site of either post-thymic or extra-thymic T-cell development. In order to address this issue, we used C3H/He/Han (Thy-1.2) → AKR/Ola (Thy-1.1) radiation bone marrow …		animal experiment; animal tissue; article; bone marrow transplantation; dendritic cell; epidermis; mouse; nonhuman; phenotype; priority journal; t lymphocyte; thymus; Animal; Antigens, CD3; Antigens, Differentiation, T-Lymphocyte; Antigens, Surface; Antigens, T-Independent; Antigens, Thy-1; Bone Marrow; Bone Marrow Cells; Chimera; Epidermis; Hematopoietic Stem Cells; Male; Mice; Phenotype; Recept…		Antigens, CD3; Antigens, Differentiation, T-Lymphocyte; Antigens, Surface; Antigens, T-Independent; Antigens, Thy-1; Receptors, Antigen, T-Cell; Receptors, Lymphocyte Homing				Stingl, G.; Division of Cutaneous Immunobiology, University of Vienna Medical School, Vienna, Austria								0022202X		JIDEA	1977801	English	J. Invest. Dermatol.	Article	Final	Open Access	Scopus	2-s2.0-0025223856
Kanauchi H., Furukawa F., Imamura S.	7004554732;7102532043;35394821100;	Characterization of cutaneous infiltrates in MRL/lpr mice monitored from onset to the full development of lupus erythematosus-like skin lesions	1991	Journal of Investigative Dermatology	96	4		478	483		41	10.1111/1523-1747.ep12470176	https://www.scopus.com/inward/record.uri?eid=2-s2.0-0025828067&doi=10.1111%2f1523-1747.ep12470176&partnerID=40&md5=424d9aad23976dddfc03b2b8e425d4cb	Department of Dermatology, Faculty of Medicine, Kyoto University, Kyoto, Japan	Kanauchi, H., Department of Dermatology, Faculty of Medicine, Kyoto University, Kyoto, Japan; Furukawa, F., Department of Dermatology, Faculty of Medicine, Kyoto University, Kyoto, Japan; Imamura, S., Department of Dermatology, Faculty of Medicine, Kyoto University, Kyoto, Japan	The skin is a primary site injured in lupus erythematosus (LE), but it is still controversial whether the injury is due to cells of the mononuclear infiltrate and which immunocompetent cells play the major role in the development of cutaneous LE. To better characterize the role of immunocompetent cells, we performed an immunohistochemical examination of these cells in LE-like skin lesions in MRL/…		animal model; article; controlled study; lupus erythematosus; mouse; priority journal; skin infiltrate						Kanauchi, H.; Department of Dermatology, Faculty of Medicine, Kyoto University, Kyoto, Japan								0022202X		JIDEA	1672542	English	J. Invest. Dermatol.	Article	Final	Open Access	Scopus	2-s2.0-0025828067
Payer E., Elbe A., Stingl G.	6701817847;7003877845;7102655442;	Circulating CD3+/T cell receptor Vγ3+ fetal murine thymocytes home to the skin and give rise to proliferating dendritic epidermal T cells	1991	Journal of Immunology	146	8		2536	2543		62		https://www.scopus.com/inward/record.uri?eid=2-s2.0-0025731019&partnerID=40&md5=5e7d73dc4c21cdb80ded8fc8423a7c1e	Department of Dermatology I, University of Vienna Medical School, Vienna Intl. Res. Cooperation Center, Vienna, Austria; Department of Dermatology I, University of Vienna Medical School, Vienna Intl. Res. Cooperation Center, Brunner Strasse 59, A-1235 Vienna, Austria	Payer, E., Department of Dermatology I, University of Vienna Medical School, Vienna Intl. Res. Cooperation Center, Vienna, Austria, Department of Dermatology I, University of Vienna Medical School, Vienna Intl. Res. Cooperation Center, Brunner Strasse 59, A-1235 Vienna, Austria; Elbe, A., Department of Dermatology I, University of Vienna Medical School, Vienna Intl. Res. Cooperation Center, Vienn…	The presence of CD3/TCR Vγ3 moieties on both dendritic epidermal T cells (DETC) and fetal murine thymocytes has led to the concept that fetal thymocytes expressing this particular TCR phenotype are the actual DETC precursors. To test this assumption, we injected i.v. thymocyte suspensions prepared from day 16 and day 19 fetal mice as well as from adult animals, into syngeneic and Thy-1-disparate …		cd3 antigen; t lymphocyte receptor; animal cell; article; dendritic cell; epidermis; fetus; lymphocyte proliferation; mouse; nonhuman; phenotype; priority journal; thymocyte; Aging; Animal; Antigens, CD3; Antigens, Differentiation, T-Lymphocyte; Cell Movement; Dendritic Cells; Epidermis; Female; Flow Cytometry; Immunophenotyping; Male; Mice; Mice, Inbred BALB C; Mice, Inbred C3H; Mice, Inbred C57…		Antigens, CD3; Antigens, Differentiation, T-Lymphocyte; Receptors, Antigen, T-Cell; Receptors, Antigen, T-Cell, gamma-delta				Payer, E.; Department of Dermatology I, University of Vienna Medical School, Vienna Intl. Res. Cooperation Center, Brunner Strasse 59, A-1235 Vienna, Austria								221767		JOIMA	1826696	English	J. Immunol.	Article	Final		Scopus	2-s2.0-0025731019
Miyauchi S., Hashimoto K., Miki Y.	24373882100;35394776300;35510780700;	Detection of in situ mitotic activity of dendritic epidermal T-cells by BrdU labeling	1991	Journal of Histochemistry and Cytochemistry	39	3		283	286		2	10.1177/39.3.1671577	https://www.scopus.com/inward/record.uri?eid=2-s2.0-0026080730&doi=10.1177%2f39.3.1671577&partnerID=40&md5=85d24f57dbe50a6d3ba3f468fe665921	Department of Dermatology, University of Ehime, School of Medicine, Shigenobucho, Onsengun, Ehime 791-02, Japan	Miyauchi, S., Department of Dermatology, University of Ehime, School of Medicine, Shigenobucho, Onsengun, Ehime 791-02, Japan; Hashimoto, K., Department of Dermatology, University of Ehime, School of Medicine, Shigenobucho, Onsengun, Ehime 791-02, Japan; Miki, Y., Department of Dermatology, University of Ehime, School of Medicine, Shigenobucho, Onsengun, Ehime 791-02, Japan	We analyzed mitotic dendritic epidermal T-cells (DETC) in the epidermis of C3H/He (Thy-1.2+) mice, using double immunoenzymatic labeling. Ear skin was incubated with 100 μM bromodeoxyuridine (BrdU) for 5 hr and then either directly studied or cultured for an additional 12 hr in BrdU-free medium. After BrdU labeling, with or without additional culture, epidermal sheets were obtained by ethylenedia…	Bromodeoxyuridine; Cell cycle; Double staining; Epidermal dendritic T-cell; Epidermal sheet	broxuridine; animal cell; article; dendritic cell; epidermis; histochemistry; mitosis; mouse; nonhuman; priority journal; T lymphocyte; Animalia		broxuridine, 59-14-3				Miyauchi, S.; Department of Dermatology, University of Ehime, School of Medicine, Shigenobucho, Onsengun, Ehime 791-02, Japan								221554		JHCYA	1671577	English	J. HISTOCHEM. CYTOCHEM.	Article	Final		Scopus	2-s2.0-0026080730
Baxter C.S., Andringa A., Chalfin K., Miller M.L.	7102322697;6701458276;6507140478;7408160374;	Effect of tumor-promoting agents on density and morphometric parameters of mouse epidermal langerhans and thy-l cells	1991	Carcinogenesis	12	6		1017	1022		12	10.1093/carcin/12.6.1017	https://www.scopus.com/inward/record.uri?eid=2-s2.0-0025914582&doi=10.1093%2fcarcin%2f12.6.1017&partnerID=40&md5=a9112ec0787ba687927bafdd9a1e26dd	University of Cincinnati Medical Center, Department of Environmental Health, 3223 Eden Avenue, ML #56, Cincinnati, OH 45267-0056, United States	Baxter, C.S., University of Cincinnati Medical Center, Department of Environmental Health, 3223 Eden Avenue, ML #56, Cincinnati, OH 45267-0056, United States; Andringa, A., University of Cincinnati Medical Center, Department of Environmental Health, 3223 Eden Avenue, ML #56, Cincinnati, OH 45267-0056, United States; Chalfin, K., University of Cincinnati Medical Center, Department of Environmental…	Topical application of tumor-promoting agents to the dorsal skin of female SENCAR mice on a twice-weekly basis resulted in a reduction in density per unit area of bone marrow-derived Thy-1+ dendritic cells. Activity was observed for well-established tumor-promoting doses of promoting agents of several different chemical types, including 12-O-tetradecanoylphorbol-13-acetate (TPA, diterpene diester…		dithranol; fluocinolone acetonide; mezerein; phorbol 13 acetate 12 myristate; tumor promoter; animal experiment; animal model; animal tissue; article; cell density; cell shape; controlled study; dendritic cell; female; langerhans cell; mathematical analysis; mouse; mouse strain; nonhuman; priority journal; topical drug administration; tumor promotion; Alkanes; Animal; Anthralin; Antigens, Surface…		dithranol, 1143-38-0, 480-22-8; fluocinolone acetonide, 67-73-2; mezerein, 34807-41-5; phorbol 13 acetate 12 myristate, 16561-29-8; Alkanes; Anthralin, 480-22-8; Antigens, Surface; Antigens, Thy-1; Carcinogens; n-dodecane, 112-40-3; Tetradecanoylphorbol Acetate, 16561-29-8			Baxter, C.S., Chalfin, K., Ringa, A., Miller, M.L., Qualitative and quantitative effects on epidermal Langerhans (Ia+) and Thy-1+ dendritic cells following topical application of phorbol diesters and mezerein (1985) Carcinogenesis, 9, pp. 1563-1568; Miller, M.L., Ringa, A., Baxter, C.S., Critical comparison of histological and morphometric changes in SENCAR mouse epidermis in response to n-dodeca…	Baxter, C.S.; University of Cincinnati Medical Center, Department of Environmental Health, 3223 Eden Avenue, ML #56, Cincinnati, OH 45267-0056, United States								1433334		CRNGD	1675159	English	Carcinogenesis	Article	Final		Scopus	2-s2.0-0025914582
Uyemura K., Deans R.J., Band H., Ohmen J., Panchamoorthy G., Morita C.T., Rea T.H., Modlin R.L.	55404652100;7003266532;7005895506;6603707479;6602856650;7007068063;7103198162;7102874029;	Evidence for clonal selection of γ/δ T cells in response to a human pathogen	1991	Journal of Experimental Medicine	174	3		683	692		71	10.1084/jem.174.3.683	https://www.scopus.com/inward/record.uri?eid=2-s2.0-0025868528&doi=10.1084%2fjem.174.3.683&partnerID=40&md5=b3cb7f4d54103cdcdaf116d9fc135f45	Division of Dermatology, UCLA School of Medicine, Los Angeles, CA, 90024, United States; Department of Microbiology and Immunology, UCLA School of Medicine, Los Angeles, CA, 90024, United States; Department of Neurology, USC School of Medicine, Los Angeles, CA, 90033, United States; Section of Dermatology, USC School of Medicine, Los Angeles, CA, 90033, United States; Laboratory of Immunochemistr…	Uyemura, K., Division of Dermatology, UCLA School of Medicine, Los Angeles, CA, 90024, United States; Deans, R.J., Department of Neurology, USC School of Medicine, Los Angeles, CA, 90033, United States; Band, H., Laboratory of Immunochemistry, Dana Farber Cancer Institute, Department of Rheumatology and Immunology, Harvard Medical School, Boston, MA, 02115, United States; Ohmen, J., Division of D…	T cells bearing γ/δ antigen receptors comprise a resident population ofintraepithelial lymphocytes in organs such as skin, gut, and lungs, where they are strategically located to contribute to the initial defense against infection. An important unsolved question about antigen-driven γ/δ T cell responses regards the breadth of their T cell receptor (TCR) repertoire, since many specific epithelial …		mycobacterium antigen; article; clinical article; gene expression; host resistance; human; human cell; mycobacterium leprae; priority journal; t lymphocyte receptor gene; Amino Acid Sequence; Base Sequence; Clone Cells; Gene Rearrangement, gamma-Chain T-Cell Antigen Receptor; Gene Rearrangement, T-Lymphocyte; Human; Lepromin; Molecular Sequence Data; Polymerase Chain Reaction; Receptors, Antigen,…		Lepromin, 11006-67-0; Receptors, Antigen, T-Cell; Receptors, Antigen, T-Cell, gamma-delta			Asarnow, D.M., Kuziel, W.A., Bonyhadi, M., Tigelaar, R.E., Tucker, P.W., Allison, J.P., Limited diversity of gamma delta antigen receptor genes of Thy-1+ dendritic epidermal cells (1988) Cell, 55, p. 837; Takagaki, Y., Decloux, A., Bonneville, M., Tonegawa, S., Diversity of gamma delta T-cell receptors on murine intestinal intra-epithelial lymphocytes (1989) Nature (Lond.)., 339, p. 712; Augustin…	Modlin, R.L.; Division of Dermatology, 52-121 CHS, UCLA School of Medicine, 10833 Le Conte Avenue, Los Angeles, CA, 90024, United States								221007			1651977	English	J. Exp. Med.	Article	Final	Open Access	Scopus	2-s2.0-0025868528
Iwashima M., Green A., Bonyhadi M., Davis M.M., Allison J.P., Chien Y.	57190780595;7404024342;6603714204;7404850298;7401475344;7201918883;	Expression of a fetal γδ T-cell receptor in adult mice triggers a non-MHC-linked form of selective depletion	1991	International Immunology	3	4		385	393		23	10.1093/intimm/3.4.385	https://www.scopus.com/inward/record.uri?eid=2-s2.0-0025828817&doi=10.1093%2fintimm%2f3.4.385&partnerID=40&md5=31051d18d67bc081e0b1eea97dc15b4a	Department of Microbiology and Immunology, Stanford University School of Medicine, Stanford, CA, United States; Howard Hughes Medical Institute, Stanford, CA, United States; Department of Microbiology and Immunology, University of California, Berkeley, CA, United States; Howard Hughes Medical Institute, University of California, San Francisco, CA, United States	Iwashima, M., Department of Microbiology and Immunology, Stanford University School of Medicine, Stanford, CA, United States, Howard Hughes Medical Institute, University of California, San Francisco, CA, United States; Green, A., Howard Hughes Medical Institute, Stanford, CA, United States; Bonyhadi, M., Department of Microbiology and Immunology, University of California, Berkeley, CA, United Sta…	Day 14 fetal thymocytes and adult dendritic epidermal T cells (dEC) of all mouse strains express a characteristic non-polymorphic γδ T-cell receptor which is rarely found in the adult thymus or lymph nodes. We have made transgenic mice expressing this particular set of receptors on T cells in C3H and C57BL/6 mice. In adult mice of the latter strain, a dramatic depletion of transgene expressing T …	γδ T cells; Non-MHC-linked selective depletion	t lymphocyte receptor delta chain; t lymphocyte receptor gamma chain; animal cell; animal experiment; article; cell maturation; controlled study; female; human cell; male; mouse; nonhuman; priority journal; t lymphocyte; Animal; Chromosome Mapping; Fetus; Genes, Dominant; Lymphocyte Depletion; Mice; Mice, Inbred Strains; Mice, Transgenic; Radiation Tolerance; Receptors, Antigen, T-Cell; Receptors…		Receptors, Antigen, T-Cell; Receptors, Antigen, T-Cell, gamma-delta			Havran, W.L., Allison, J.P., Developmentally ordered appearance of thymocytes expressing different T-cell antigen receptors (1988) Nature, 335, p. 443; Itohara, S., Nakanishi, N., Kanagawa, O., Kubo, R., Tonegawa, S., Monoclonal antibodies specific to native murine T-cell receptor γδ: Analysis of γδ T-cells in thymic ontogeny and peripheral lymphoid organs (1989) Proc. Natl Acad. Sd. USA, 865, p.…	Iwashima, M.; Department of Microbiology and Immunology, Stanford University School of Medicine, Stanford, CA, United States								9538178		INIME	1831656	English	Int. Immunol.	Article	Final		Scopus	2-s2.0-0025828817
Leclercq G., De Smedt M., Plum J.	7102003388;7005619658;7007064115;	Interleukin-2 stimulated T cell receptor Vγ3 positive thymocytes do not migrate to the skin	1991	Immunology Letters	28	2		135	141		1	10.1016/0165-2478(91)90111-M	https://www.scopus.com/inward/record.uri?eid=2-s2.0-0025828969&doi=10.1016%2f0165-2478%2891%2990111-M&partnerID=40&md5=63a91c956b12d6f5194dfef3484e465e	Laboratory of Bacteriology, Virology and Immunology, University of Ghent, Ghent, Belgium	Leclercq, G., Laboratory of Bacteriology, Virology and Immunology, University of Ghent, Ghent, Belgium; De Smedt, M., Laboratory of Bacteriology, Virology and Immunology, University of Ghent, Ghent, Belgium; Plum, J., Laboratory of Bacteriology, Virology and Immunology, University of Ghent, Ghent, Belgium	T cell receptor (TcR) Vγ3+ thymocytes, which only develop in the fetal thymus, migrate to the skin [1]. IL-2 stimulation of fetal day 18 murine thymocytes results in a cell population of which 45% of the cells express the TcR Vγ3 [2]. In this study, we describe that those IL-2 cultured TcR Vγ3+ thymocytes have the killing capacity of lymphokine activated killer cells: NK-susceptible as well as NK…	Asialo-GM1; IL-2 culture; Migration; TcR Vγ3+ thymocyte	interleukin 2; t lymphocyte receptor; animal cell; animal experiment; animal tissue; article; cancer immunotherapy; cell migration; fetus; mouse; nonhuman; priority journal; skin cancer; thymocyte; Age Factors; Animal; Cell Movement; Comparative Study; Cytotoxicity, Immunologic; Immunotherapy, Adoptive; Interleukin-2; Killer Cells, Lymphokine-Activated; Mice; Mice, Inbred BALB C; Mice, Nude; Rece…		Interleukin-2; Receptors, Antigen, T-Cell; Receptors, Antigen, T-Cell, gamma-delta; Recombinant Proteins		hoffmann la roche, United States	Havran, Allison, (1990) Nature, 344, p. 68; Leclercq, De Smedt, Tison, Plum, (1990) J. Immunol., 145. , in press; Lotze, Grimm, Mazumder, Strausser, Rosenberg, (1981) Cancer Res., 41, p. 4420; Rosenberg, Lotze, Muul, Chang, Avis, Leitman, Lineham, White, (1987) New Engl. J. Med., 316, p. 889; Plum, Koning, Leclercq, Tison, De Smedt, (1990) J. Immunol., 144, p. 3710; Nixon-Fulton, Kuziel, Santerse…	Plum, J.; Laboratory of Bacteriology, Virology and Immunology, University of Ghent, Ghent, Belgium								1652478		IMLED	1832139	English	Immunol. Lett.	Article	Final		Scopus	2-s2.0-0025828969
IBAGAKI N.S., TAMAKI K., SHIMADA S.	57192033300;35390850700;7402762452;	In‐vivo administration of recombinant IL‐2 increases the number of Thy‐1+ dendritic epidermal cells	1991	British Journal of Dermatology	125	2		116	122		5	10.1111/j.1365-2133.1991.tb06057.x	https://www.scopus.com/inward/record.uri?eid=2-s2.0-0025743860&doi=10.1111%2fj.1365-2133.1991.tb06057.x&partnerID=40&md5=8a108c5c0aa61c97d9208ca4c2077b82	Department of Dermatology, Yamanashi Medical College, 1110 Shimokato Tamaho, Nakakomagun, Yamanashi, 409-38, Japan	IBAGAKI, N.S., Department of Dermatology, Yamanashi Medical College, 1110 Shimokato Tamaho, Nakakomagun, Yamanashi, 409-38, Japan; TAMAKI, K., Department of Dermatology, Yamanashi Medical College, 1110 Shimokato Tamaho, Nakakomagun, Yamanashi, 409-38, Japan; SHIMADA, S., Department of Dermatology, Yamanashi Medical College, 1110 Shimokato Tamaho, Nakakomagun, Yamanashi, 409-38, Japan	Summary The number, morphology and response of Thy‐1+ dendritic epidermal cells to recombinant interleukin‐2 (rIL‐2) were investigated in young and aged mice. The Thy‐1+ dendritic cells in the aged mice continued to express T‐cell receptor (TCR) γ/δ but differed morphologically from those of the young mice. The aged mice had 50% fewer cells than the young ones. In the rIL‐2 treated mice all the T…		interleukin 2; thy 1 antigen; adolescent; aged; animal tissue; article; dendritic cell; female; intraperitoneal drug administration; male; mouse; nonhuman; priority journal; skin cell; ultrastructure; Abdomen; Age Factors; Animal; Antibodies, Monoclonal; Antigens, Surface; Antigens, Thy-1; Dendritic Cells; Epidermis; Female; Foot; Interleukin-2; Isoantibodies; Mice; Recombinant Proteins; Support,…		interleukin 2, 85898-30-2; anti-Thy antibody; Antibodies, Monoclonal; Antigens, Surface; Antigens, Thy-1; Interleukin-2; Isoantibodies; Recombinant Proteins		takeda chemical industries, Japan	Shimada, S, Caughman, SW, Bluestone, JA, Freshly isolated Thy‐1+ dendritic epidermal cells express T cell receptor γδ‐CD3 (1990) Journal of Dermatological Science, 1, pp. 459-464; Koning, F, Stingl, G, Yokoyama, WM, Identification of a T3 associated γδ T cell receptor on Thy‐1+ dendritic epidermal cell lines (1987) Science, 236, pp. 834-837; Stingl, G, Koning, F, Yamada, H, Thy‐1+ dendritie epide…	IBAGAKI, N.S.; Department of Dermatology, Yamanashi Medical College, 1110 Shimokato Tamaho, Nakakomagun, Yamanashi, 409-38, Japan								70963			1680371	English	Br. J. Dermatol.	Article	Final		Scopus	2-s2.0-0025743860
Halliday G.M., Reeve V.E., Barnetson R.St.C.	35353860100;7005499708;57206414591;	Langerhans cell migration into ultraviolet light-induced squamous skin tumors is unrelated to anti-tumor immunity	1991	Journal of Investigative Dermatology	97	5		830	834		19	10.1111/1523-1747.ep12491503	https://www.scopus.com/inward/record.uri?eid=2-s2.0-0026095281&doi=10.1111%2f1523-1747.ep12491503&partnerID=40&md5=ff61f6d4fa5c9727c097dd91afdf63be	Departments of Dermatology, University of Sydney, Sydney, NSW, Australia; DepartmentVeterinary Pathology, University of Sydney, Sydney, NSW, Australia	Halliday, G.M., Departments of Dermatology, University of Sydney, Sydney, NSW, Australia; Reeve, V.E., DepartmentVeterinary Pathology, University of Sydney, Sydney, NSW, Australia; Barnetson, R.St.C., Departments of Dermatology, University of Sydney, Sydney, NSW, Australia	There has been much speculation as to the role of Langerhans cells (LC) in the induction of anti-tumor immunity. Whereas there is considerable circumstantial evidence that disruptions in the density and function of these cells during the early stages of ultraviolet (UV) light-and chemical carcinogen-induced carcinogenesis may be important for enabling developing neoplasms to escape immune destruc…		cytokine; animal experiment; animal tissue; article; controlled study; immune response; langerhans cell; lymphocyte; mouse; nonhuman; priority journal; skin tumor; squamous cell carcinoma; ultraviolet radiation; Animal; Antibody Formation; Antigens, Surface; Antigens, Thy-1; Carcinoma, Squamous Cell; CD4-CD8 Ratio; Cell Count; Cell Movement; Female; Histocompatibility Antigens Class II; Langerhan…		Antigens, Surface; Antigens, Thy-1; Histocompatibility Antigens Class II				Halliday, G.M.; Departments of Dermatology, University of Sydney, Sydney, NSW, Australia								0022202X		JIDEA	1680931	English	J. Invest. Dermatol.	Article	Final	Open Access	Scopus	2-s2.0-0026095281
Aubin F., Dall'Acqua F., Kripke M.L.	56232495800;7006049951;7101915890;	Local suppression of contact hypersensitivity in mice by a new bifunctional psoralen, 4,4′,5′-trimethylazapsoralen, and UVA radiation	1991	Journal of Investigative Dermatology	97	1		50	54		15	10.1111/1523-1747.ep12478010	https://www.scopus.com/inward/record.uri?eid=2-s2.0-0025819365&doi=10.1111%2f1523-1747.ep12478010&partnerID=40&md5=784bab6883bda4deb26c9ac058c0bfe2	Department of Immunology (FA, MLK) University of Texas, M. D. Anderson Cancer Center, Houston, TX, United States; Department of Pharmaceutical Science (FDA), University of Padova, Padova, Italy	Aubin, F., Department of Immunology (FA, MLK) University of Texas, M. D. Anderson Cancer Center, Houston, TX, United States; Dall'Acqua, F., Department of Pharmaceutical Science (FDA), University of Padova, Padova, Italy; Kripke, M.L., Department of Immunology (FA, MLK) University of Texas, M. D. Anderson Cancer Center, Houston, TX, United States	Although psoralens plus UVA radiation (320-400 nm) have been widely used for the treatment of dermatologic diseases, the toxic effects of these agents have led investigators to develop new photochemotherapeutic compounds. One such compound is 4,4′,5′-trimethylazapsoralen (TMAP), a new bifunctional molecule. The purpose of this study was to examine the immunologic side effects of repeated treatmen…		4,4',5' trimethylazapsoralen; psoralen derivative; unclassified drug; animal model; article; contact allergy; controlled study; mouse; priority journal; topical drug administration; ultraviolet a radiation; Animal; Dendritic Cells; Dermatitis, Contact; Dinitrofluorobenzene; Female; Histocompatibility Antigens Class II; Lymph Nodes; Mice; Mice, Inbred C3H; Psoralens; PUVA Therapy; Spleen; Support,…		4,4',5'-trimethylazapsoralen, 120482-97-5; Dinitrofluorobenzene, 70-34-8; Histocompatibility Antigens Class II; Psoralens				Kripke, M.L.; Department of Immunology (FA, MLK) University of Texas, M. D. Anderson Cancer Center, Houston, TX, United States								0022202X		JIDEA	2056193	English	J. Invest. Dermatol.	Article	Final	Open Access	Scopus	2-s2.0-0025819365
Kuziel W.A., Lewis J., Nixon‐Fulton J., Tigelaar R.E., Tucker P.W.	7006422901;55483972600;6602411425;7007168145;7202804766;	Murine epidermal γ/δ T cells express Fcγ receptor II encoded by the FcγRα α gene	1991	European Journal of Immunology	21	6		1563	1566		21	10.1002/eji.1830210635	https://www.scopus.com/inward/record.uri?eid=2-s2.0-0025806655&doi=10.1002%2feji.1830210635&partnerID=40&md5=2def64bfdc2d76c56d9b6e28002657cb	Departments of Microbiology, University of Texas Southwestern Medical Center, Dallas, United States; Departments of Dermatology, University of Texas Southwestern Medical Center, Dallas, United States; Department of Dermatology, Yale University School of Medicine, New Haven, Connecticut, 06510, United States	Kuziel, W.A., Departments of Microbiology, University of Texas Southwestern Medical Center, Dallas, United States; Lewis, J., Departments of Dermatology, University of Texas Southwestern Medical Center, Dallas, United States, Department of Dermatology, Yale University School of Medicine, New Haven, Connecticut, 06510, United States; Nixon‐Fulton, J., Departments of Dermatology, University of Texa…	Short‐term bulk cultures and some long‐term clones and lines of murine T cell receptor (TcR) γ/δ‐bearing epidermal T cells (dEC) were found to express an Fcγ receptor II (FcγRII), as revealed by reactivity with the monoclonal antibody 2.4G2. Northern blot analysis showed that the FcγRII expressed on dEC is encoded solely by the FcγR α gene. While all the various cultured dEC cell populations anal…		Fc receptor; t lymphocyte receptor; animal cell; antibody dependent cellular cytotoxicity; article; epidermis; mouse; natural killer cell; nonhuman; priority journal; Animal; Antibody-Dependent Cell Cytotoxicity; Antigens, Differentiation; Cells, Cultured; Epidermis; Mice; Mice, Inbred AKR; Mice, Inbred BALB C; Mice, Inbred CBA; Receptors, Antigen, T-Cell; Receptors, Antigen, T-Cell, gamma-delta;…		Antigens, Differentiation; Receptors, Antigen, T-Cell; Receptors, Antigen, T-Cell, gamma-delta; Receptors, Fc; Receptors, IgG			Bergstresser, P.R., Tigelaar, R.E., Dees, J.H., Streilein, J.W., (1983) J. Invest. Dermatol., 81, p. 286; Tschachler, E., Schuler, G., Hetterer, J., Leibl, H., Wolff, K., Stingl, G., (1983) J. Invest. Dermatol., 81, p. 282; Bergstresser, P.R., Tigelaar, R.E., Streilein, J.W., (1984) J. Invest. Dermatol., 83, p. 83; Breathnach, S.M., Katz, S.I., (1984) J. Invest. Dermatol., 83, p. 74; Tigelaar, R.…	Tucker, P.W.; Department of Microbiology, University of Texas Southwestern Medical Center, Dallas, Texas, 75235, United States								142980			1828429	English	Eur. J. Immunol.	Article	Final		Scopus	2-s2.0-0025806655
Havran W.L., Chien Y.-H., Allison J.P.	7004541279;7201918883;7401475344;	Recognition of self antigens by skin-derived T cells with invariant γδ antigen receptors	1991	Science	252	5011		1430	1432		302	10.1126/science.1828619	https://www.scopus.com/inward/record.uri?eid=2-s2.0-0025836121&doi=10.1126%2fscience.1828619&partnerID=40&md5=d83ea01160b4dea007ed22d6858d4439	Dept. of Molecular and Cell Biology, Cancer Research Laboratory, University of California, Berkeley, CA 94720, United States; Dept. of Microbiology and Immunology, Stanford University, Stanford, CA 94305, United States	Havran, W.L., Dept. of Molecular and Cell Biology, Cancer Research Laboratory, University of California, Berkeley, CA 94720, United States; Chien, Y.-H., Dept. of Microbiology and Immunology, Stanford University, Stanford, CA 94305, United States; Allison, J.P., Dept. of Molecular and Cell Biology, Cancer Research Laboratory, University of California, Berkeley, CA 94720, United States	Thy-1+ dendritic epidermal T cells (dECs) express invariant γδ antigen receptors and are found in intimate contact with keratinocytes in murine epidermis - thus raising the possibility that keratinocytes express a ligand for the antigen receptor of these T cells. Thy-1+ dECs were stimulated to produce lymphokines by interaction with keratinocytes in vitro. This stimulation was mediated through th…		Murinae; Animalia; Murinae; antigen; animal tissue; article; dendritic cell; mouse; nonhuman; priority journal; skin; t lymphocyte; Animal; Autoantigens; Cell Line; Dendrites; Epidermis; Immunity, Cellular; In Vitro; Interleukin-2; Keratinocytes; Mice; Mice, Inbred BALB C; Receptors, Antigen, T-Cell; Receptors, Antigen, T-Cell, gamma-delta; Support, Non-U.S. Gov't; Support, U.S. Gov't, P.H.S.; T-…		Autoantigens; Interleukin-2; Receptors, Antigen, T-Cell; Receptors, Antigen, T-Cell, gamma-delta			Allison, J.P., Raulet, D.H., (1990) Sem. Immunol., 2, p. 59; Vidovic, D., (1990) Nature, 340, p. 646; Bonneville, M., (1989) Proc. Natl. Acad. Sci. U.S.A., 86, p. 5928; Ito, K., (1990) Cell, 62, p. 549; Janis, E.M., Kaufmann, S.H.E., Schwartz, R.H., Pardoll, D.M., (1989) Science, 244, p. 713; Born, W., (1990) Immunol. Today, 11, p. 40; O'Brien, R.L., (1989) Cell, 57, p. 667; Bergstresser, P.R., T…	Havran, W.L.; Dept. of Molecular and Cell Biology, Cancer Research Laboratory, University of California, Berkeley, CA 94720, United States			American Association for the Advancement of Science					368075		SCIEA	1828619	English	Science	Article	Final		Scopus	2-s2.0-0025836121
Ferrick D.A., Sydlora B., Wallace V., Gemmell‐Hori L., Kronenberg M., Mak T.W.	7005918753;57195044455;57198270739;6507240453;26643154000;7401931099;	Self‐Reactive γδ T Lymphocytes: Implications for T‐Cell Ontogeny and Reactivity	1991	Immunological Reviews	120	1		51	69		14	10.1111/j.1600-065X.1991.tb00587.x	https://www.scopus.com/inward/record.uri?eid=2-s2.0-0025921586&doi=10.1111%2fj.1600-065X.1991.tb00587.x&partnerID=40&md5=906197f647cbc04f9a905d9ec0ab4c8d	Department of Veterinary Microbiology & Immunology, School of Veterinary Medicine, University of California, Davis, California, 95616, United States; Department of Microbiology and Immunology and Jonsson Comprehensive Cancer Center, Ucla School of Medicine, University of California, Los Angeles, California, 90024-1747, United States; Department of Medical Biophysics, Ontario Cancer Institute, Tor…	Ferrick, D.A., Department of Veterinary Microbiology & Immunology, School of Veterinary Medicine, University of California, Davis, California, 95616, United States; Sydlora, B., Department of Microbiology and Immunology and Jonsson Comprehensive Cancer Center, Ucla School of Medicine, University of California, Los Angeles, California, 90024-1747, United States; Wallace, V., Department of Medical …	[No abstract available]		t lymphocyte receptor delta chain; t lymphocyte receptor gamma chain; autoantigen; HLA antigen class 1; lymphocyte antigen receptor; Receptors, Antigen, T Cell; Receptors, Antigen, T Cell, gamma delta; Tla antigens; animal cell; animal experiment; animal tissue; autoimmunity; mouse; nonhuman; priority journal; review; t lymphocyte subpopulation; animal; biological model; biosynthesis; cytology; d…		Autoantigens; Histocompatibility Antigens Class I; Receptors, Antigen, T-Cell; Receptors, Antigen, T-Cell, gamma-delta; Tla antigens			Asarnow, D.M., Goodman, T., LeFrancois, L., Allison, J.P., Distinct antigen receptor repertoires of two classes of murine epithelium‐associated T cells (1989) Nature, 341, p. 60; Asarnow, D.M., Kuziel, W.A., Bonyhadi, M., Tigelaar, R.E., Tucker, P.W., Allison, J.P., Limited diversity of γδ antigen receptor genes of Thy‐1+ dendritic epidermal cells (1988) Cell, 55, p. 837; Augustin, A., Kubo, R.T.…	Ferrick, D.A.; Department of Veterinary Microbiology & Immunology, School of Veterinary Medicine, University of California, Davis, California, 95616, United States								1052896			1650761	English	Immunol. Rev.	Article	Final		Scopus	2-s2.0-0025921586
Ikeda S., Tominaga T., Nishimura C.	56418806500;7201672662;7102715728;	Thy 1+ asialo GM1+ dendritic epidermal cells in skin defense mechanisms of vaccinia virus-infected mice	1991	Archives of Virology	117	43894		207	218		10	10.1007/BF01310766	https://www.scopus.com/inward/record.uri?eid=2-s2.0-0026085061&doi=10.1007%2fBF01310766&partnerID=40&md5=d8ef30fef32d532c8585e9e0fef2aa51	School of Pharmaceutical Sciences, Kitasato University, Minato-ku, Tokyo, Japan	Ikeda, S., School of Pharmaceutical Sciences, Kitasato University, Minato-ku, Tokyo, Japan; Tominaga, T., School of Pharmaceutical Sciences, Kitasato University, Minato-ku, Tokyo, Japan; Nishimura, C., School of Pharmaceutical Sciences, Kitasato University, Minato-ku, Tokyo, Japan	To define different growths of vaccinia virus (VV) in the footpad, ear and tail skin of ddY and BALB/c mice, we investigated the roles of Ia+ Langerhans cells (LC) and Ia- dendritic epidermal cells (DEC) in the skin defense mechanisms. With respect to LC obtained from the footpad, ear and tail skin of BALB/c mice, the level of lysosomal enzyme, phagocytic, antigen-presenting and antiviral activit…		HLA antigen class 2; monoclonal antibody; adoptive immunotherapy; animal; article; cytology; dendritic cell; ear; female; foot; germfree animal; immunology; Langerhans cell; mouse; mouse strain; nude mouse; skin; tail; transplantation; vaccinia; Animal; Antibodies, Monoclonal; Dendritic Cells; Ear; Female; Foot; Histocompatibility Antigens Class II; Immunotherapy, Adoptive; Langerhans Cells; Mice…		Antibodies, Monoclonal; Histocompatibility Antigens Class II			Anderson, P., Caligiuri, M., Ritz, J., Schlossman, S.F., CD3-negative natural killer cells express ξ TCR as part of a novel molecular complex (1989) Nature, 341, pp. 159-162; Bergstresser, P.R., Tigelaar, R.E., Dees, J.H., Streilein, J.W., Thy-1 antigen-bearing dendritic cells populate murine epidermis (1983) J Invest Dermatol, 81, pp. 286-288; Boyle JJ, Haff RE, Stewart RC (1967) Evaluation of a…	Ikeda, S.; School of Pharmaceutical Sciences, Kitasato University, Minato-ku, Tokyo, Japan			Springer-Verlag					3048608		ARVID	1826826	English	Arch. Virol.	Article	Final		Scopus	2-s2.0-0026085061
Vroom T.M., Scholte G., Ossendorp F., Borst J.	18839603300;6603422623;7003839818;56562618800;	Tissue distribution of human γδ T cells: No evidence for general epithelial tropism	1991	Journal of Clinical Pathology	44	12		1012	1017		33	10.1136/jcp.44.12.1012	https://www.scopus.com/inward/record.uri?eid=2-s2.0-0026348968&doi=10.1136%2fjcp.44.12.1012&partnerID=40&md5=6d9fd33f7d375954f021765556f8062b	Division of Immunology, Netherlands Cancer Institute, Plesmanlaan 121, 1066 CX Amsterdam, Netherlands	Vroom, T.M., Division of Immunology, Netherlands Cancer Institute, Plesmanlaan 121, 1066 CX Amsterdam, Netherlands; Scholte, G., Division of Immunology, Netherlands Cancer Institute, Plesmanlaan 121, 1066 CX Amsterdam, Netherlands; Ossendorp, F., Division of Immunology, Netherlands Cancer Institute, Plesmanlaan 121, 1066 CX Amsterdam, Netherlands; Borst, J., Division of Immunology, Netherlands Ca…	In man and mice only a small proportion of T cells in the peripheral lymphoid compartment express the γδ T cell receptor (TCR). In mice, however, γδ T cells comprise the predominant population at particular epithelial sites-in epidermis and epithelia of intestine, reproductive organs, and tongue. The distribution of γδ T cells in normal human tissues was investigated, paying particular attention …		T lymphocyte receptor; article; epithelium; human; human tissue; immunohistochemistry; immunosurveillance; intestine mucosa; priority journal; T lymphocyte subpopulation						Borst, J.; Division of Immunology, Netherlands Cancer Institute, Plesmanlaan 121, 1066 CX Amsterdam, Netherlands								219746		JCPAA	1838746	English	J. CLIN. PATHOL.	Article	Final	Open Access	Scopus	2-s2.0-0026348968
Ho K.K.-L., Halliday G.M., Barnetson R.S.C.	7403581639;35353860100;35495150500;	Topical and oral retinoids protect Langerhans' cells and epidermal Thy-1+ dendritic cells from being depleted by ultraviolet radiation	1991	Immunology	74	3		425	431		16		https://www.scopus.com/inward/record.uri?eid=2-s2.0-0025986042&partnerID=40&md5=f0ad5734a23a5ae05053202411835615	Department of Dermatology, University of Sydney, Royal Prince Alfred Hospital, Camperdown, NSW 2050, Australia	Ho, K.K.-L., Department of Dermatology, University of Sydney, Royal Prince Alfred Hospital, Camperdown, NSW 2050, Australia; Halliday, G.M., Department of Dermatology, University of Sydney, Royal Prince Alfred Hospital, Camperdown, NSW 2050, Australia; Barnetson, R.S.C., Department of Dermatology, University of Sydney, Royal Prince Alfred Hospital, Camperdown, NSW 2050, Australia	Murine epidermis contains two types of bone marrow-derived cells of the immune system, Langerhans' cells (LC), which are dendritic antigen-presenting cells, and Thy-1+ dendritic cells (Thy-1+ DEC), which express the gamma/delta T-cell receptor for antigen and hence are probably T cells whose function in the epidermis is unknown. Ultraviolet (UV) light greatly reduces the density of both of these …		retinoic acid; temarotene; animal experiment; animal tissue; article; dendritic cell; depletion; langerhans cell; mouse; nonhuman; priority journal; ultraviolet radiation; Animal; Antigens, Surface; Antigens, Thy-1; Cell Count; Dendritic Cells; Dermatitis, Contact; Epidermis; Immune Tolerance; Langerhans Cells; Mice; Mice, Inbred HRS; Retinoids; Support, Non-U.S. Gov't; Ultraviolet Rays		retinoic acid, 302-79-4; temarotene, 75078-91-0; Antigens, Surface; Antigens, Thy-1; Retinoids		hoffmann la roche, Switzerland; sigma, United States		Halliday, G.; Department of Dermatology, University of Sydney, Royal Prince Alfred Hospital, Camperdown, NSW 2050, Australia								192805		IMMUA	1685145	English	IMMUNOLOGY	Article	Final		Scopus	2-s2.0-0025986042
Aguilar L.K., Belmont J.W.	35494820300;7006437037;	Vγ3 T cell receptor rearrangement and expression in the adult thymus	1991	Journal of Immunology	146	4		1348	1352		20		https://www.scopus.com/inward/record.uri?eid=2-s2.0-0026080550&partnerID=40&md5=48937c775566794053d60c14af44d664	Dept. of Microbiology and Immunology, Baylor College of Medicine, Houston, TX 77030, United States; Institute for Molecular Genetics, Baylor College of Medicine, Houston, TX 77030, United States; Howard Hughes Medical Institute, Baylor College of Medicine, Houston, TX 77030, United States; Institute for Molecular Genetics, Baylor College of Medicine, One Baylor Plaza, Houston, TX 77030, United St…	Aguilar, L.K., Dept. of Microbiology and Immunology, Baylor College of Medicine, Houston, TX 77030, United States; Belmont, J.W., Dept. of Microbiology and Immunology, Baylor College of Medicine, Houston, TX 77030, United States, Institute for Molecular Genetics, Baylor College of Medicine, Houston, TX 77030, United States, Howard Hughes Medical Institute, Baylor College of Medicine, Houston, TX …	Rearrangement and expression of the Vγ3-Jγ1 TCR has been found in murine dendritic epidermal cells (DEC) and fetal thymus. By using the polymerase chain reaction technique, Vγ3-Jγ1 rearrangements and RNA expression were detected in the murine adult thymus. Individual genomic and cDNA junctions were cloned and sequenced. In genomic DNA, 55% (16/29) of Vγ3-Jγ1 junctional sequences had N regions ran…		t lymphocyte receptor; animal tissue; article; fetus; gene expression; gene rearrangement; mouse; newborn; nonhuman; priority journal; thymus; Animal; Animals, Newborn; Base Sequence; Comparative Study; Gene Expression Regulation; Gene Rearrangement, gamma-Chain T-Cell Antigen Receptor; Genomic Library; Mice; Mice, Inbred BALB C; Molecular Sequence Data; Polymerase Chain Reaction; Receptors, Anti…		Receptors, Antigen, T-Cell; Receptors, Antigen, T-Cell, gamma-delta; RNA, Messenger				Belmont, J.W.; Institute for Molecular Genetics, Baylor College of Medicine, One Baylor Plaza, Houston, TX 77030, United States								221767		JOIMA	1846899	English	J. Immunol.	Article	Final		Scopus	2-s2.0-0026080550
Payer E., Strohal R., Kutil R., Elbe A., Stingl G.	6701817847;56618310800;6603924317;7003877845;7102655442;	Demonstration of a CD3+ lymphocyte subset in the epidermis of athymic nude mice: Evidence for T cell receptor diversity	1992	Journal of Immunology	149	2		413	420		15		https://www.scopus.com/inward/record.uri?eid=2-s2.0-0026750336&partnerID=40&md5=07ce6b073263330bfa1c6746a76ae1df	Division of Cutaneous Immunobiology, Department of Dermatology I, University of Vienna Medical School, Brunner Str. 59, A-1235 Vienna, Austria	Payer, E., Division of Cutaneous Immunobiology, Department of Dermatology I, University of Vienna Medical School, Brunner Str. 59, A-1235 Vienna, Austria; Strohal, R., Division of Cutaneous Immunobiology, Department of Dermatology I, University of Vienna Medical School, Brunner Str. 59, A-1235 Vienna, Austria; Kutil, R., Division of Cutaneous Immunobiology, Department of Dermatology I, University…	The existence of CD3/TCR-bearing lymphocytes in athymic and thymectomized chimeric mice implies that T cell maturation can occur in the absence of a thymus. Considering the possibility that the epidermis may be one of the organs providing T cell educating stimuli, we attempted to characterize the Thy-1+ epidermal lymphocyte population of athymic mice. Immunohistologic studies of epidermal sheets …		cd3 antigen; leukocyte antigen; t lymphocyte receptor; animal cell; article; cell maturation; epidermis cell; immunohistology; immunoreactivity; lymphocyte subpopulation; lymphoid cell; mitogenesis; mouse; nonhuman; nude mouse; ontogeny; priority journal; thymectomy; Age Factors; Animal; Antigens, CD3; Antigens, Differentiation, T-Lymphocyte; Antigens, Surface; Antigens, Thy-1; Base Sequence; Cel…		Antigens, CD3; Antigens, Differentiation, T-Lymphocyte; Antigens, Surface; Antigens, Thy-1; Membrane Glycoproteins; Receptors, Antigen, T-Cell; RNA, Messenger				Payer, E.; Division of Cutaneous Immunobiology, Department of Dermatology I, University of Vienna Medical School, Brunner Str. 59, A-1235 Vienna, Austria								221767		JOIMA	1352529	English	J. IMMUNOL.	Article	Final		Scopus	2-s2.0-0026750336
Burnham K., Rahman M.	7007184667;57067203200;	Effects of petrochemicals and ultraviolet radiation on epidermal ia expression in vitro	1992	Journal of Toxicology and Environmental Health	35	3		175	185		4	10.1080/15287399209531607	https://www.scopus.com/inward/record.uri?eid=2-s2.0-0026533160&doi=10.1080%2f15287399209531607&partnerID=40&md5=c457fa27af999840d78aee8c8638d2bc	Department of Microbiology, Oklahoma State University, Stillwater, OK, United States	Burnham, K., Department of Microbiology, Oklahoma State University, Stillwater, OK, United States; Rahman, M., Department of Microbiology, Oklahoma State University, Stillwater, OK, United States	We previously demonstrated that combined treatment of mice with crude oil and longwave ultraviolet radiation (UVA) led to the depletion of lA-positive cells from the epidermis. In the present study; we have developed an in vitro screening assay for combined effects of purified petrochemicals and UVA on epidermal IA and Thy-1 expression. This method involves removal of skin from donor mice prior t…		anthracene; benzo[a]pyrene; petroleum; phenanthrene; animal experiment; animal tissue; article; controlled study; epidermis; female; mouse; nonhuman; photosensitization; priority journal; skin; ultraviolet radiation; Animals; Anthracenes; Antigens, Surface; Antigens, Thy-1; Benzo(a)pyrene; Cell Count; Culture Techniques; Dendritic Cells; Dose-Response Relationship, Drug; Dose-Response Relationshi…		anthracene, 120-12-7; benzo[a]pyrene, 50-32-8; petroleum, 8002-05-9; phenanthrene, 85-01-8; Anthracenes; Antigens, Surface; Antigens, Thy-1; Benzo(a)pyrene, 50-32-8; Histocompatibility Antigens Class II; Membrane Glycoproteins; Petroleum; Phenanthrenes; Polycyclic Compounds; anthracene, 120-12-7; phenanthrene, 85-01-8			Alcalay, J., Kripke, M.L., Antigen-presenting activity of draining lymph node cells from mice painted with a contact allergen during ultraviolet carcinogenesis (1991) J. Immunol, 146, pp. 1717-1721; Bergstresser, P.R., Elmets, C.A., Streilein, J.W., Local effects of ultraviolet radiation on immune function in mice (1983) The Effects of Ultraviolet Radiation on the Immune System, pp. 73-86. , J. P…	Burnham, K.; Department of Microbiology, Oklahoma State University, 307 LSE, Stillwater, OK, 74078, United States								984108			1351103	English	J. Toxicol. Environ. Health	Article	Final		Scopus	2-s2.0-0026533160
Cáceres-Dittmar G., Sánchez M.A., Oriol O., Kraal G., Tapia F.J.	6601907879;55460705700;24326552200;16750417600;7004435959;	Epidermal compromise in American cutaneous leishmaniasis	1992	Journal of Investigative Dermatology	99	5		95	98		14		https://www.scopus.com/inward/record.uri?eid=2-s2.0-0026486532&partnerID=40&md5=5990206ed5a4d0c27811cf8022ed6d0e	Instituto de Biomedicina, Universidad Central de Venezuela, Caracas, Venezuela; and the Department of Cell Biology, Faculty of Medicine, Vrije Universiteit, Amsterdam, The Netherlands	Cáceres-Dittmar, G., Instituto de Biomedicina, Universidad Central de Venezuela, Caracas, Venezuela; and the Department of Cell Biology, Faculty of Medicine, Vrije Universiteit, Amsterdam, The Netherlands; Sánchez, M.A., Instituto de Biomedicina, Universidad Central de Venezuela, Caracas, Venezuela; and the Department of Cell Biology, Faculty of Medicine, Vrije Universiteit, Amsterdam, The Nether…	In American cutaneous leishmaniasis (ACL), Leishmania parasites enter the epidermis of the host via the bite of infected sandflies. Immune responses against the parasite vary from "effective" in localized (LCL) to a state of "selective anergy" in diffuse (DCL) cutaneous leishmaniasis, whereas the intermediate muco-cutaneous form (MCL) is characterized by an exacerbated cell-mediated immunity. We …		animal experiment; animal model; animal tissue; conference paper; controlled study; dendritic cell; epidermis; immune response; Langerhans cell; Leishmania; mouse; nonhuman; priority journal; skin leishmaniasis						Tapia, F.J.								0022202X		JIDEA	1358984	English	J. Invest. Dermatol.	Article	Final		Scopus	2-s2.0-0026486532
Payer E., Elbe A., Stingl G.	6701817847;7003877845;7102655442;	Epidermal T lymphocytes - ontogeny, features and function	1992	Springer Seminars in Immunopathology	13	43894		315	331		13	10.1007/BF00200531	https://www.scopus.com/inward/record.uri?eid=2-s2.0-0026752057&doi=10.1007%2fBF00200531&partnerID=40&md5=9d5e900f828b22cd8206a5f7a8d4f37d	Division of Cutaneous Immunobiology, Department of Dermatology I, University of Vienna Medical School, Vienna International Research Cooperation Center, Brunner Strasse 59, Vienna, A-1235, Austria	Payer, E., Division of Cutaneous Immunobiology, Department of Dermatology I, University of Vienna Medical School, Vienna International Research Cooperation Center, Brunner Strasse 59, Vienna, A-1235, Austria; Elbe, A., Division of Cutaneous Immunobiology, Department of Dermatology I, University of Vienna Medical School, Vienna International Research Cooperation Center, Brunner Strasse 59, Vienna,…	The murine epidermis contains a network of Thy-1+ dendritic T cells. These T cells arise from early fetal stem cells and differentiate in the fetal or neonatal thymic or epidermal microenvironment. Their lack of expression of CD5, CD4, and CD8 antigens, as well as their virtually exclusive expression of a CD3/TCR Vγ3/Vδ1 complex, distinguishes DETC from the bulk of peripheral T cells. The early a…		t lymphocyte receptor; animal cell; animal tissue; dendritic cell; epidermis; human; human cell; human tissue; mouse; nonhuman; ontogeny; priority journal; rat; review; t lymphocyte subpopulation; Animal; Antigens, Surface; Antigens, Thy-1; Cell Differentiation; Dendritic Cells; Human; Langerhans Cells; Membrane Glycoproteins; Mice; Rats; Skin; T-Lymphocyte Subsets; T-Lymphocytes		Antigens, Surface; Antigens, Thy-1; Membrane Glycoproteins			Aberer, W., Romani, N., Elbe, A., Stingl, G., Effects of physicochemical agents on murine epidermal Langerhans cells and Thy-1-positive dendritic epidermal cells (1986) J Immunol, 136, p. 1210; Allison, J.P., Havran, W.L., The immunobiology of T cells with invariant γδ antigen receptors (1991) Annu Rev Immunol, 9, p. 679; Allison, J.P., Lanier, L.L., Structure, function, and serology of the T-cel…	Payer, E.; Division of Cutaneous Immunobiology, Department of Dermatology I, University of Vienna Medical School, Vienna International Research Cooperation Center, Brunner Strasse 59, Vienna, A-1235, Austria			Springer-Verlag					3444325		SSIMD	1357760	English	Springer Semin Immunopathol	Article	Final		Scopus	2-s2.0-0026752057
Ota Y., Kobata T., Seki M., Yagita H., Shimada S., Huang Y.‐Y., Takagaki Y., Okumura K.	36771716100;7006385986;7402040348;55192275000;7402762452;57191390427;7101636598;57070730100;	Extrathymic origin of Vγ1/Vδ6 T cells in the skin	1992	European Journal of Immunology	22	2		595	598		26	10.1002/eji.1830220245	https://www.scopus.com/inward/record.uri?eid=2-s2.0-0026601965&doi=10.1002%2feji.1830220245&partnerID=40&md5=e10028cfacd296beb2d1241642447bac	Department of Immunology, Juntendo University School of Medicine, Tokyo, Japan; Department of Dermatology, Yamanashi Medical College, Yamanashi, Japan; Laboratory of Molecular Immunology, Mitsubishi Kasai Institute of Life Sciences, Tokyo, Japan	Ota, Y., Department of Immunology, Juntendo University School of Medicine, Tokyo, Japan; Kobata, T., Department of Immunology, Juntendo University School of Medicine, Tokyo, Japan; Seki, M., Department of Immunology, Juntendo University School of Medicine, Tokyo, Japan; Yagita, H., Department of Immunology, Juntendo University School of Medicine, Tokyo, Japan; Shimada, S., Department of Dermatolo…	The dendritic epidermal cells (dEC) from young (8‐week‐old) athymic mice were found to express mRNA for γ/δ T cell receptors (TcR). The mRNA found in the dEC from athymic mice was expressed only for Vγ1‐Jγ4‐Cγ4 and Vδ6‐Jδ‐Cδ with both chains having productive rearrangements and junctional diversity. On the other hand, the dEC from euthymic mice carried Vγ5‐Jγ1‐Cγ1 and Vδ1‐Jδ2‐Cδ in addition to th…		complementary dna; heat shock protein; messenger rna; mycobacterium antigen; t lymphocyte receptor; animal cell; article; epidermis cell; mouse; nonhuman; nucleotide sequence; polymerase chain reaction; priority journal; skin; t lymphocyte; t lymphocyte subpopulation; thymus; Animal; Base Sequence; Blotting, Southern; Cell Differentiation; Gene Expression; Gene Rearrangement, delta-Chain T-Cell A…	GENBANK: S90657, S90659, S90756, S90757, S90758, S90759, S90771, S90774, S90775, S90777	Oligodeoxyribonucleotides; Receptors, Antigen, T-Cell, gamma-delta; RNA, Messenger			Zinkernagel, R.M., Althage, A., Waterfield, E., Kindred, B., Welsh, R.M., Callahan, G., Pincetl, P., (1980) J. Exp. Med., 151, p. 376; Kishihara, K., Yoshikai, Y., Matsuzaki, G., Mak, T.W., Nomoto, K., (1987) Eur. J. Immunol., 17, p. 477; Lawetzky, A., Hünig, T., (1988) Eur. J. Immunol., 18, p. 409; Yoshikai, Y., Reis, M.D., Mak, T.W., (1986) Nature, 324, p. 482; Yoshikai, Y., Matsuzaki, G., Take…	Okumura, K.; Department of Immunology, Juntendo University School of Medicine, 2-1-1 Hongo Bunkyoku, Tokyo, 113, Japan								142980			1311264	English	Eur. J. Immunol.	Article	Final		Scopus	2-s2.0-0026601965
Elbe A., Kilgus O., Strohal R., Payer E., Schreiber S., Stingl G.	7003877845;6603415962;56618310800;6701817847;7402870143;7102655442;	Fetal skin: A site of dendritic epidermal T cell development	1992	Journal of Immunology	149	5		1694	1701		27		https://www.scopus.com/inward/record.uri?eid=2-s2.0-0026782897&partnerID=40&md5=e85e9f86b7e471a5e91fddcd466ef08f	Department of Dermatology I, VIRCC, University of Vienna Medical School, Brunner Strasse 59, A-1235 Vienna, Austria	Elbe, A., Department of Dermatology I, VIRCC, University of Vienna Medical School, Brunner Strasse 59, A-1235 Vienna, Austria; Kilgus, O., Department of Dermatology I, VIRCC, University of Vienna Medical School, Brunner Strasse 59, A-1235 Vienna, Austria; Strohal, R., Department of Dermatology I, VIRCC, University of Vienna Medical School, Brunner Strasse 59, A-1235 Vienna, Austria; Payer, E., De…	Thy-1 Ag and CD3-associated TCR-γ (Vγ3)/δ(Vδ1) are coexpressed on virtually all dendritic epidermal T cells (DETC) in the adult mouse. In contrast, day 16 fetal mouse skin contains small numbers of CD45+/Thy- 1+/CD3- but no CD3+ cells. To see whether the CD45+/Thy-1+/CD3- fetal skin cells can qualify as DETC precursors, we transplanted day 16 fetal skin of C57BL/6 (Thy-1.2) mice onto adult B6P1-T…		cd3 antigen; cd45 antigen; interleukin 2; t lymphocyte receptor; thy 1 antigen; animal cell; animal experiment; animal tissue; article; cell growth; cell line; cell maturation; cell suspension; cell transplantation; dendritic cell; epidermis cell; fetus; gene expression; immunohistology; male; mouse; nonhuman; priority journal; skin; skin graft; t lymphocyte; Animal; Antigens, CD; Antigens, CD3; …		interleukin 2, 85898-30-2; Antigens, CD; Antigens, CD3; Antigens, CD45; Antigens, Differentiation, T-Lymphocyte; Antigens, Surface; Antigens, Thy-1; Histocompatibility Antigens; Membrane Glycoproteins; Receptors, Antigen, T-Cell; RNA, Messenger				Elbe, A.; Department of Dermatology I, VIRCC, University of Vienna Medical School, Brunner Strasse 59, A-1235 Vienna, Austria								221767		JOIMA	1354679	English	J. IMMUNOL.	Article	Final		Scopus	2-s2.0-0026782897
Enk A.H., Katz S.I.	55094698000;7403462507;	Identification and induction of keratinocyte-derived IL-10	1992	Journal of Immunology	149	1		92	95		287		https://www.scopus.com/inward/record.uri?eid=2-s2.0-0026721289&partnerID=40&md5=0838491f7ad4bb598a477bf4811b1e78	Dermatol. Br. Natl. Institutes Hlth., National Cancer Institute, Bethesda, MD 20892, United States; NCI/NIH, Dermatology Branch, Building 10, Bethesda, MD 20892, United States	Enk, A.H., Dermatol. Br. Natl. Institutes Hlth., National Cancer Institute, Bethesda, MD 20892, United States; Katz, S.I., Dermatol. Br. Natl. Institutes Hlth., National Cancer Institute, Bethesda, MD 20892, United States, NCI/NIH, Dermatology Branch, Building 10, Bethesda, MD 20892, United States	It has previously been demonstrated that the epidermis is a rich source of proinflammatory cytokines and growth factors and that complex interactions between these factors may affect inflammatory responses in skin. To investigate whether IL-10 (cytokine synthesis inhibitory factor) is part of this complex process, RNA was extracted from normal epidermis at various times after application of vario…		cd4 antigen; contact allergen; cytokine; drug vehicle; gamma interferon; growth factor; hapten; immunoglobulin e; immunoglobulin g1; interleukin 10; irritant agent; major histocompatibility antigen class 2; messenger rna; monoclonal antibody; rna; rna directed dna polymerase; thy 1 antigen; animal cell; animal model; animal tissue; article; b lymphocyte; cell clone; cytotoxic t lymphocyte; delaye…		gamma interferon, 82115-62-6; immunoglobulin E, 37341-29-0; RNA directed DNA polymerase, 37213-50-6, 9068-38-6; RNA, 63231-63-0; Allergens; Interleukin-10, 130068-27-8; Oligodeoxyribonucleotides; Picryl Chloride, 88-88-0; RNA, Messenger				Katz, S.I.; NCI/NIH, Dermatology Branch, Building 10, Bethesda, MD 20892, United States								221767		JOIMA	1607665	English	J. Immunol.	Article	Final		Scopus	2-s2.0-0026721289
Shimada S., Shibagaki N., Tanaka T., Kubota Y., Hashimoto Y., Tamaki K.	7402762452;7003490306;55628537360;19434966000;7404551018;35390850700;	Identification of an equivalent to murine Thy-1+ dendritic epidermal cells in the rat epidermis	1992	Journal of Dermatological Science	3	1		68	71		4	10.1016/0923-1811(92)90010-9	https://www.scopus.com/inward/record.uri?eid=2-s2.0-0026548644&doi=10.1016%2f0923-1811%2892%2990010-9&partnerID=40&md5=dd8aebe2ff07baa19def6942763e0b9c	Department of Dermatology, Yamanashi Medical College, Japan; Department of Hygienic Chemistry, Pharmaceutical Institute, Tohoku University, Sendai, Japan	Shimada, S., Department of Dermatology, Yamanashi Medical College, Japan; Shibagaki, N., Department of Dermatology, Yamanashi Medical College, Japan; Tanaka, T., Department of Hygienic Chemistry, Pharmaceutical Institute, Tohoku University, Sendai, Japan; Kubota, Y., Department of Dermatology, Yamanashi Medical College, Japan; Hashimoto, Y., Department of Hygienic Chemistry, Pharmaceutical Instit…	In the murine epidermis, there exist Thy-1+ dendritic epidermal cells (Thy-1+DEC). These cells are Thy-1+, CD45+, CD3+ and asialo GM1+ but CD5-, CD4-, CD8-, or Ia-1-, and express T cell receptor (TCR)γδ. Recently, most of these TCRγδ of Thy-1 DEC are shown to consist of a Vγ3-Vδ1 combination. There has been no evidence that the same type of cell population exists in other species except mice. In …	Rat; T cell receptor γδ; Thy-1+ dendritic epidermal cell	t lymphocyte receptor; thy 1 antigen; animal cell; animal tissue; antigen presenting cell; article; controlled study; epidermis cell; rat; Animal; Antibodies, Monoclonal; Antigens, CD; Antigens, CD3; Antigens, CD45; Antigens, Differentiation, T-Lymphocyte; Antigens, Surface; Antigens, Thy-1; Dendritic Cells; Epidermis; Female; Histocompatibility Antigens; Membrane Glycoproteins; Precipitin Tests;…		Antibodies, Monoclonal; Antigens, CD; Antigens, CD3; Antigens, CD45; Antigens, Differentiation, T-Lymphocyte; Antigens, Surface; Antigens, Thy-1; Histocompatibility Antigens; Membrane Glycoproteins; Receptors, Antigen, T-Cell; Receptors, Antigen, T-Cell, gamma-delta			Shimada, Caughman, Bluestone, Cron, Owen, Smith, Katz, Freshly isolated Thy-1+ dendritic epidermal cells express T cell receptor γδ-CD3 (1990) Journal of Dermatological Science, 1, pp. 459-464; Koning, Stingl, Yokoyama, Yamada, Maloy, Tschachler, Shevach, Coligan, Identification of a T3 associated γδ T cell receptor on Thy-1+ dendritic epidermal cell lines (1987) Science, 236, pp. 834-837; Stingl…	Shimada, S.; Department of Dermatology, Yamanashi Medical CollegeJapan								9231811		JDSCE	1350463	English	J. Dermatol. Sci.	Article	Final		Scopus	2-s2.0-0026548644
Tanaka T., Takeuchi Y., Shiohara T., Kitamura F., Nagasaka Y., Hamamura K., Yagita H., Miyasaka M.	55628537498;16748288300;7005668489;7005150866;7103230613;7004163833;55192275000;8051660500;	In utero treatment with monoclonal antibody to IL-2 receptor β-chain completely abrogates development of Thy-1+ dendritic epidermal cells	1992	International Immunology	4	4		487	491		31	10.1093/intimm/4.4.487	https://www.scopus.com/inward/record.uri?eid=2-s2.0-0026538614&doi=10.1093%2fintimm%2f4.4.487&partnerID=40&md5=27fa0f50640fecf99aababcbf8ecffe0	Department of Immunology, Tokyo Metropolitan Institute of Medical Science, 3-18-22 Honkomagome, Bunkyo-ku, Tokyo 113, Japan; Department of Internal Medicine, Facutlyof Medicine, University of Tokyo, 7-3-1 Hongo, Bunkyo-ku, Tokto 113, Japan; Department of Dermatology, Kyorin University School of Medicine, 6-20-2 Shinkawa, Mitaka, Tokyo 181, Japan; Department of Immunology, Juntendo University Scho…	Tanaka, T., Department of Immunology, Tokyo Metropolitan Institute of Medical Science, 3-18-22 Honkomagome, Bunkyo-ku, Tokyo 113, Japan; Takeuchi, Y., Department of Immunology, Tokyo Metropolitan Institute of Medical Science, 3-18-22 Honkomagome, Bunkyo-ku, Tokyo 113, Japan, Department of Internal Medicine, Facutlyof Medicine, University of Tokyo, 7-3-1 Hongo, Bunkyo-ku, Tokto 113, Japan; Shiohar…	lnterleukin-2 (IL-2), a crucial growth factor for mature T lymphocytes, Is produced in fetal thymus under developmental control, although its biological significance remains unclear. We found that the two distinct subunits of the IL-2 receptor, I.e. the a-chain (IL-2Rα) and the β-chaln (IL-2Rβ), were expressed In an almost mutually exclusive fashion throughout fetal thymus ontogeny, and that the …	γ T cells; Fetal thymocytes; IL-2/IL-2 receptor system; Mouse; T cell development	interleukin 2; interleukin 2 receptor; membrane antigen; monoclonal antibody; article; cell maturation; female; mouse; nonhuman; ontogeny; priority journal; t lymphocyte; thymocyte; thymus; Animal; Antibodies, Monoclonal; Antigens, Surface; Antigens, Thy-1; Dendritic Cells; Female; Fetus; Membrane Glycoproteins; Mice; Mice, Inbred C57BL; Pregnancy; Receptors, Interleukin-2; Skin; Support, Non-U.S…		interleukin 2, 85898-30-2; Antibodies, Monoclonal; Antigens, Surface; Antigens, Thy-1; Membrane Glycoproteins; Receptors, Interleukin-2			Dallman, M.J., Montgomery, R.A., Larsen, C.P., Wanders, A., Wells, A.F., Cytokine gene expression Analysis using northern blotting, polymerase chain reaction and in situ hybridization (1991) Immunol. Rev, pp. 119-163; Jenkinson, E.J., Kingston, R., Owen, T.J.J., Importance of IL-2 receptors in intra-thymic generation of cells expressing T-cell receptors (1987) Nature, 329, p. 160; Tentori, L., Lo…	Tanaka, T.; Department of Immunology, Tokyo Metropolitan Institute of Medical Science, 3-18-22 Honkomagome, Bunkyo-ku, Tokyo 113, Japan								9538178		INIME	1350462	English	Int. Immunol.	Article	Final	Open Access	Scopus	2-s2.0-0026538614
Donawho C.K., Kripke M.L.	6602607917;7101915890;	Lack of correlation between UV‐induced enhancement of melanoma development and local suppression of contact hypersensitivity	1992	Experimental Dermatology	1	1		20	26		11	10.1111/j.1600-0625.1992.tb00067.x	https://www.scopus.com/inward/record.uri?eid=2-s2.0-0026893766&doi=10.1111%2fj.1600-0625.1992.tb00067.x&partnerID=40&md5=235507226e6852f71a2b032136b5c229	Department of Immunology, University of Texas M D. Anderson Cancer Center, Houston, Texas, United States	Donawho, C.K., Department of Immunology, University of Texas M D. Anderson Cancer Center, Houston, Texas, United States; Kripke, M.L., Department of Immunology, University of Texas M D. Anderson Cancer Center, Houston, Texas, United States	Abstract Injection of melanoma cells into the UV‐irradiated ear skin of syngeneic mice results in an increased incidence of melanomas compared with that in nonirradiated ear skin. This effect of UV is localized to the site of irradiation and appears to be immunoiogically mediated. In these studies we test the hypothesis that the effect of UV irradiation on melanoma development is related to its a…	melanoma; photoimmunology; tumor immunity; ultraviolet B	adenosine triphosphatase; Antigens, Thy 1; HLA antigen class 2; membrane antigen; membrane protein; Thy 1 antigen; animal; article; cancer transplantation; contact dermatitis; enzymology; experimental melanoma; female; immunology; isograft; Langerhans cell; metabolism; mouse; mouse strain; radiation exposure; radiation injury; ultraviolet radiation; Adenosinetriphosphatase; Animal; Antigens, Surf…		adenosine triphosphatase, 37289-25-1, 9000-83-3; Adenosinetriphosphatase, EC 3.6.1.3; Antigens, Surface; Antigens, Thy-1; Histocompatibility Antigens Class II; Membrane Glycoproteins			Kripke, ML., Effects of UV radiation on tumor immunity (1990) J Natl Cancer Inst, 82, pp. 1392-1396; Romerdahl, CA, Donawho, C, Fidler, IJ., Kripke, ML., Effect of ultraviolet‐B radiation on the in vivo growth of murine melanoma cells (1988) Cancer Res, 48, pp. 4007-4010; Donawho, C, Kriple, ML., Evidence that the local effect of UV radiation on the growth of murine melanomas is immunologically m…	Kripke, M.L.; Department ol Immunology, The University of Texas M. D. Anderson Cancer Center, Houston, Texas, United States								9066705			1364252	English	Exp. Dermatol.	Article	Final		Scopus	2-s2.0-0026893766
Correa I., Bix M., Liao N.-S., Zijlstra M., Jaenisch R., Raulet D.	7004138577;6701767221;7004274986;7003862144;35418963400;7006111540;	Most γδ T cells develop normally in β2-microglobulin-deficient mice	1992	Proceedings of the National Academy of Sciences of the United States of America	89	2		653	657		138	10.1073/pnas.89.2.653	https://www.scopus.com/inward/record.uri?eid=2-s2.0-0026501748&doi=10.1073%2fpnas.89.2.653&partnerID=40&md5=a3f353db531b39f48440f766a42944ef	Department of Molecular, 489 LSA, University of California, Berkeley, CA 94720, United States; Whitehead Inst. for Biomed. Research, Nine Cambridge Center, Cambridge, MA 02142, United States; Department of Biology, Massachusetts Inst. of Technology, Cambridge, MA 02142, United States	Correa, I., Department of Molecular, 489 LSA, University of California, Berkeley, CA 94720, United States; Bix, M., Department of Molecular, 489 LSA, University of California, Berkeley, CA 94720, United States; Liao, N.-S., Department of Molecular, 489 LSA, University of California, Berkeley, CA 94720, United States; Zijlstra, M., Whitehead Inst. for Biomed. Research, Nine Cambridge Center, Cambr…	The specificity of T cells bearing γδ T-cell receptors (γδ+ T cells) is poorly characterized. Earlier studies suggest that like αβ+CD8+ T cells, some γδ+ T cells may recognize antigens associated with class I major histocompatibility complex molecules. αβ+CD8+ T cells are nearly absent in class I-deficient mice (mutant for β2-microglobulin), reflecting a requirement for intrathymic "positive sele…	Major histocompatibility complex class I; Positive selection; T-cell development	beta 2 microglobulin; major histocompatibility antigen class 1; animal cell; animal model; article; cell differentiation; controlled study; mouse; mutant; nonhuman; priority journal; protein defect; t lymphocyte; Animal; Antigens, CD8; Antigens, Surface; Antigens, Thy-1; beta 2-Microglobulin; Epidermis; Flow Cytometry; Gene Rearrangement, T-Lymphocyte; Genitalia; Intestinal Mucosa; Lymph Nodes; M…		beta 2 microglobulin, 9066-69-7; Antigens, CD8; Antigens, Surface; Antigens, Thy-1; beta 2-Microglobulin; Receptors, Antigen, T-Cell, gamma-delta			Raulet, D.H., (1989) Annu. Rev. Immunol., 7, pp. 175-207; Brenner, M.B., Strominger, J.L., Krangel, M.S., (1988) Adv. Immunol., 43, pp. 133-191; O'Brien, R., Happ, M.P., Dallas, A., Palmer, E., Kubo, R., Born, W.K., (1989) Cell, 57, pp. 667-674; Janis, E.M., Kaufman, S.H.E., Schwartz, R.H., Pardoll, D.M., (1989) Science, 244, pp. 713-716; Holoshitz, J., Koning, F., Coligan, J., De Bruyn, J., Stro…	Raulet, D.; Department of Molecular, 489 LSA, University of California, Berkeley, CA 94720, United States			National Academy of Sciences					278424		PNASA	1346234	English	Proc. Natl. Acad. Sci. U. S. A.	Article	Final	Open Access	Scopus	2-s2.0-0026501748
Wilde D.B., Roberts K., Sturmh?fel K., Kikuchi G., Coligan J.E., Shevach E.M.	7005935658;7402041323;6603417686;7006987358;7101937287;7102804155;	Mouse autoreactive γ/δ T cells I. Functional properties of autoreactive T cell hybridomas	1992	European Journal of Immunology	22	2		483	489		24	10.1002/eji.1830220229	https://www.scopus.com/inward/record.uri?eid=2-s2.0-0026556808&doi=10.1002%2feji.1830220229&partnerID=40&md5=355242e4a065d27fef8a017ca6343f92	Laboratory of Immunology, National Institute of Allergy and Infectious Diseases, National Institutes of Health, Bethesda, United States; Biological Resources Branch, National Institute of Allergy and Infectious Diseases, National Institutes of Health, Bethesda, United States	Wilde, D.B., Laboratory of Immunology, National Institute of Allergy and Infectious Diseases, National Institutes of Health, Bethesda, United States; Roberts, K., Laboratory of Immunology, National Institute of Allergy and Infectious Diseases, National Institutes of Health, Bethesda, United States; Sturmh?fel, K., Biological Resources Branch, National Institute of Allergy and Infectious Diseases,…	A minor population of dendritic epidermal T cells (DETC) express the Vγ1. 1Cγ4Vδ6 T cell receptor and T cell clones and hybridomas derived from this subset constitutively secrete cytokines in culture secondary to recognition of an autoantigen. Activation of these autoreactive cells requires the use of the vitronection receptor (VNR) as an accessory molecule which interacts with the Arg‐Gly‐Asp‐Se…		autoantigen; cytokine; granulocyte macrophage colony stimulating factor; membrane antigen; monoclonal antibody; protein; receptor; t lymphocyte receptor; animal cell; article; cell function; cell line; clone; hybridoma; mouse; nonhuman; priority journal; recognition; spleen; spleen cell; t lymphocyte; t lymphocyte subpopulation; thymocyte; thymus; Animal; Antigens, Surface; Autoimmunity; Cytokine…		Antigens, Surface; Cytokines; Extracellular Matrix Proteins; Receptors, Antigen, T-Cell, gamma-delta; Receptors, Immunologic; Receptors, Vitronectin			Triebel, F., Hercend, T., (1989) Immunol. Today, 10, p. 186; Raulet, D.H., (1989) Annu. Rev. Immunol., 7, p. 175; Ito, K., Bonneville, M., Takagaki, T., Nakanishi, N., Kanagawa, O., Krecko, E., Tonegawa, S., (1989) Proc. Natl. Acad. Sci. USA, 86, p. 631; Havran, W.L., Allison, J.P., (1988) Nature, 335, p. 443; Koning, F., Stingl, G., Yokoyama, W.M., Yamada, H., Maloy, W.L., Tschachler, E., Shevac…	Shevach, E.M.; Laboratory of Immunology, Room 11N315, Bethesda, Maryland, 20892, United States								142980			1371469	English	Eur. J. Immunol.	Article	Final		Scopus	2-s2.0-0026556808
Ezquerra A., Wilde D.B., McConnell T.J., Sturmh?fel K., Valas R.B., Shevach E.M., Coligan J.E.	7004701612;7005935658;7006916511;6603417686;6507279135;7102804155;7101937287;	Mouse autoreactive γ/δ T cells II. Molecular characterization of the T cell receptor	1992	European Journal of Immunology	22	2		491	498		23	10.1002/eji.1830220230	https://www.scopus.com/inward/record.uri?eid=2-s2.0-0026512305&doi=10.1002%2feji.1830220230&partnerID=40&md5=e2a339fdfdd53ef8e1a7224ff05bbfef	Biological Resources Branch, National Institute of Allergy and Infectious Diseases, National Institutes of Health, Bethesda, United States; Laboratory of Immunology, National Institute of Allergy and Infectious Diseases, National Institutes of Health, Bethesda, United States	Ezquerra, A., Biological Resources Branch, National Institute of Allergy and Infectious Diseases, National Institutes of Health, Bethesda, United States; Wilde, D.B., Laboratory of Immunology, National Institute of Allergy and Infectious Diseases, National Institutes of Health, Bethesda, United States; McConnell, T.J., Biological Resources Branch, National Institute of Allergy and Infectious Dise…	A panel of dendritic epidermal T cell (DETC) lines, and hybridomas derived from them, has been shown to spontaneously secrete lymphokines in the absence of added stimuli, which suggests that these cells are autoreactive. These cell lines are characterized by the expression of a Vγ1.1Cγ4/Vδ6 type T cell receptor (TcR), but several of the DETC lines also express a second TcR. Sequence analyses of t…		antigen; complementary dna; lymphokine; rna; t lymphocyte receptor; animal cell; article; cell line; cell secretion; hybridoma; immunoprecipitation; molecular biology; mouse; nonhuman; polymerase chain reaction; priority journal; protein analysis; t lymphocyte; thymocyte; Amino Acid Sequence; Animal; Autoimmunity; Base Sequence; Cell Line; Comparative Study; DNA; Epidermis; Gene Expression; Gene …	GENBANK: S90637, S90638, S90639, S90647, S90650, S90651, S90653, S90654, S90657, S90659	RNA, 63231-63-0; DNA, 9007-49-2; Lymphokines; Oligodeoxyribonucleotides; Receptors, Antigen, T-Cell, gamma-delta			Raulet, D.H., (1989) Anna. Rev. Immunol., 7, p. 175; Havran, W.L., Allison, J.P., (1988) Nature, 335, p. 443; Stingl, G., Koning, F., Yamada, H., Yokoyama, W.M., Tschachler, E., Bluestone, J.A., Steiner, G., Coligan, J.E., (1987) Proc. Natl. Acad. Sci. USA, 84, p. 4586; Koning, F., Stingl, G., Yokoyama, W.M., Yamada, H., Maloy, W.L., Tschachler, E., Shevach, E.M., Coligan, J.E., (1987) Science, 2…	Coligan, J.E.; Biological Resources Branch, NIAID/NIH, Building 4, Room 413, Bethesda, Maryland, 20892, United States								142980			1311262	English	Eur. J. Immunol.	Article	Final		Scopus	2-s2.0-0026512305
Kr?henbühl O., Gattesco S., Tschopp J.	6603145469;6507468677;7102194509;	Murine Thy-1+ Dendritic Epidermal T Cell Lines Express Granule-Associated Perforin and a Family of Granzyme Molecules	1992	Immunobiology	184	43926		392	401		12	10.1016/S0171-2985(11)80596-6	https://www.scopus.com/inward/record.uri?eid=2-s2.0-0026545602&doi=10.1016%2fS0171-2985%2811%2980596-6&partnerID=40&md5=ffa0a56267494eb125607073361b8ce6	Institute of Biochemistry, University of Lausanne, Epalinges, Switzerland	Kr?henbühl, O., Institute of Biochemistry, University of Lausanne, Epalinges, Switzerland; Gattesco, S., Institute of Biochemistry, University of Lausanne, Epalinges, Switzerland; Tschopp, J., Institute of Biochemistry, University of Lausanne, Epalinges, Switzerland	Two T cell receptor γ/δ+ murine dendritic epidermal T cell (DETC) lines with cytotoxic potential towards various tumor cell lines are shown to express perforin and granzyme A both at the mRNA and protein levels. Furthermore, mRNA transcripts for granzyme B and at least one of the other granzymes D, E, F and G are detected in amounts equivalent to a murine IL-2-dependent α/β+ cytotoxic T lymphocyt…	BLT; dendritic epidermal T cell; DETC; heat shock protein; HSP; N-α-benzyloxycarbonyl-L-lysine thiobenzyl ester; T cell receptor; TCR	granzyme a; granzyme b; granzyme d; granzyme e; messenger rna; perforin; protein; serine proteinase; t lymphocyte receptor; unclassified drug; animal cell; article; cell line; cytolysis; cytotoxicity; dendritic cell; epidermis cell; immunosurveillance; mouse; nonhuman; priority journal; t lymphocyte; tumor cell line; Animal; Antigens, Surface; Antigens, Thy-1; Blotting, Northern; Cell Line; Compa…		perforin, 119332-27-3; protein, 67254-75-5; serine proteinase, 37259-58-8; Antigens, Surface; Antigens, Thy-1; granzyme A, EC 3.4.21.78; Membrane Glycoproteins; Membrane Proteins; perforin, 126465-35-8; Receptors, Antigen, T-Cell, gamma-delta; RNA, Messenger; Serine Endopeptidases, EC 3.4.21			Tschachler, E., Schuler, G., Hutterer, J., Leibl, H., Wolff, K., Stingl, G., Expression of Thy-1 antigen by murine epidermal cells (1983) J. Invest. Dermatol., 81, p. 282; Bergstresser, P.R., Tigelaar, R.E., Dees, J.H., Streilein, J.W., Thy-1 antigen-bearing dendritic epidermal cells populate murine epidermis (1983) J. Invest. Dermatol., 81, p. 286; Stingl, G., Koning, F., Yamada, H., Yokoyama, W…	Kr?henbühl, O.; Institute of Biochemistry, University of Lausanne, Epalinges, Switzerland								1712985			1350566	English	Immunobiology	Article	Final		Scopus	2-s2.0-0026545602
Halliday G.M., Ho K.K.-L., Barnetson R.St.C.	35353860100;7403581639;57206414591;	Regulation of the skin immune system by retinoids during carcinogenesis	1992	Journal of Investigative Dermatology	99	5		83	86		16		https://www.scopus.com/inward/record.uri?eid=2-s2.0-0026489229&partnerID=40&md5=41043cf2013f11941aec3d1e3ef21364	Department of Dermatology, University of Sydney, Royal Prince Alfred Hospital, Missenden Road, Camperdown, NSW, Australia	Halliday, G.M., Department of Dermatology, University of Sydney, Royal Prince Alfred Hospital, Missenden Road, Camperdown, NSW, Australia; Ho, K.K.-L., Department of Dermatology, University of Sydney, Royal Prince Alfred Hospital, Missenden Road, Camperdown, NSW, Australia; Barnetson, R.St.C., Department of Dermatology, University of Sydney, Royal Prince Alfred Hospital, Missenden Road, Camperdow…	One of the immunosuppressive effects of both ultraviolet (UV) light and chemical carcinogens is to deplete Langerhans cells (LC) from the epidermis, suggesting that these cells play an important role in inducing immune responses to developing tumors during the early phases of carcinogenesis. Retinoids such as all-trans-retinoic acid (RA) are natural or synthetic derivatives of vitamin A; RA binds…		carcinogen; retinoic acid; retinoid; retinol derivative; temarotene; animal cell; animal experiment; animal model; animal tissue; carcinogenesis; cell density; cell migration; conference paper; controlled study; dendritic cell; immunomodulation; langerhans cell; mouse; nonhuman; priority journal; skin cancer; topical drug administration; ultraviolet radiation; Animal; Antigens, Surface; Antigens,…		retinoic acid, 302-79-4; temarotene, 75078-91-0; Antigens, Surface; Antigens, Thy-1; Membrane Glycoproteins; Retinoids; Tetradecanoylphorbol Acetate, 16561-29-8				Halliday, G.M.; Department of Dermatology, University of Sydney, Royal Prince Alfred Hospital, Missenden Road, Camperdown, NSW, Australia								0022202X		JIDEA	1358983	English	J. Invest. Dermatol.	Article	Final		Scopus	2-s2.0-0026489229
Welsh E.A., Love-Schimenti C., Kripke M.L.	35862917600;6507284026;7101915890;	Studies on the mechanism of immunologic tolerance induction by murine dendritic epidermal Thy-1+ cell lines.	1992	Journal of leukocyte biology	52	4		425	432		4	10.1002/jlb.52.4.425	https://www.scopus.com/inward/record.uri?eid=2-s2.0-0026930021&doi=10.1002%2fjlb.52.4.425&partnerID=40&md5=354256cf1827b0b03089e6c9f244d343	Department of Immunology, University of Texas M.D. Anderson Cancer Center, Houston, 77030., United States	Welsh, E.A., Department of Immunology, University of Texas M.D. Anderson Cancer Center, Houston, 77030., United States; Love-Schimenti, C., Department of Immunology, University of Texas M.D. Anderson Cancer Center, Houston, 77030., United States; Kripke, M.L., Department of Immunology, University of Texas M.D. Anderson Cancer Center, Houston, 77030., United States	We are investigating the functions of the Thy-1+ dendritic cells present in murine epidermis. Dendritic epidermal Thy-1+ cell (DETC) lines conjugated in vitro with hapten induce specific immunologic tolerance upon intravenous (i.v.) or subcutaneous injection into the footpad of normal mice. In these studies, we demonstrate that hapten-conjugated cells of other long-term, interleukin-2 (IL-2)-depe…		fluorescein isothiocyanate; hapten; interleukin 2; membrane antigen; membrane protein; Thy 1 antigen; adoptive immunotherapy; animal; article; C3H mouse; C57BL mouse; cell culture; cell division; contact dermatitis; dendritic cell; epidermis; female; immunological tolerance; immunology; lymphocyte activation; mouse; physiology; regulatory T lymphocyte; T lymphocyte; time; Animals; Antigens, Surfa…		fluorescein isothiocyanate, 25168-13-2, 27072-45-3, 3326-32-7; interleukin 2, 85898-30-2; Antigens, Surface; Antigens, Thy-1; Fluorescein-5-isothiocyanate, 3326-32-7; Haptens; Interleukin-2; Membrane Glycoproteins				Welsh, E.A.								7415400			1357065	English	J. Leukoc. Biol.	Article	Final		Scopus	2-s2.0-0026930021
Ho K.K.-L., Halliday G.M., Barnetson R.St.C.	7403581639;35353860100;57206414591;	Sunscreens protect epidermal langerhans cells and THy-1+ cells but not local contact sensitization from the effects of ultraviolet light	1992	Journal of Investigative Dermatology	98	5		720	724		38	10.1111/1523-1747.ep12499926	https://www.scopus.com/inward/record.uri?eid=2-s2.0-0026508003&doi=10.1111%2f1523-1747.ep12499926&partnerID=40&md5=67478de2a49533f7ef7f5a3cd8ee3be4	Department of Dermatology, University of Sydney, Royal Prince Alfred Hospital, Camperdown, NSW, Australia	Ho, K.K.-L., Department of Dermatology, University of Sydney, Royal Prince Alfred Hospital, Camperdown, NSW, Australia; Halliday, G.M., Department of Dermatology, University of Sydney, Royal Prince Alfred Hospital, Camperdown, NSW, Australia; Barnetson, R.St.C., Department of Dermatology, University of Sydney, Royal Prince Alfred Hospital, Camperdown, NSW, Australia	This study compares the ability of two commonly used sunscreens-octyl dimethyl para-aminobenzoate (Padimate O) and 2-ethylhexyl-p-methoxycinnamate (2-EHMC)-to protect Langerhans cells (LC), Thy-1+ dendritic epidermal cells (Thy-1+ dEC), and local contact sensitivity (CS) from the effects of ultraviolet (UV) light. Chronic exposure of mice 5 d per week for 4 weeks with an intermediate dose of sola…		4 dimethylaminobenzoic acid 2 ethylhexyl ester; 4 methoxycinnamic acid 2 ethylhexyl ester; sunscreen; thy 1 antigen; animal cell; animal experiment; article; contact sensitization; controlled study; epidermis; human; langerhans cell; mouse; priority journal; ultraviolet radiation; Animal; Antigens, Surface; Antigens, Thy-1; Cell Count; Dendritic Cells; Dermatitis, Contact; Langerhans Cells; Membr…		4 dimethylaminobenzoic acid 2 ethylhexyl ester, 21245-02-3; 4 methoxycinnamic acid 2 ethylhexyl ester, 5466-77-3; Antigens, Surface; Antigens, Thy-1; Membrane Glycoproteins; Picryl Chloride, 88-88-0; Sunscreening Agents	padimate o, ici, Australia	givaudan, Australia; ici, Australia; johnson and johnson, Australia		Halliday, G.M.; Department of Dermatology, University of Sydney, Royal Prince Alfred Hospital, Camperdown, NSW, Australia								0022202X		JIDEA	1349029	English	J. Invest. Dermatol.	Article	Final	Open Access	Scopus	2-s2.0-0026508003
Fujita M., Miyachi Y., Furukawa F., Toichi E., Furukawa I., Nakajima N., Imamura S.	35391197300;35397409800;7102532043;6603107734;7006162367;16139180000;35394821100;	A case of cutaneous T-cell lymphoma expressing γδ T-cell receptors	1993	Journal of the American Academy of Dermatology	28	2		355	360		25	10.1016/0190-9622(93)70054-W	https://www.scopus.com/inward/record.uri?eid=2-s2.0-0027463690&doi=10.1016%2f0190-9622%2893%2970054-W&partnerID=40&md5=a479091324e7d9a29d06b361ff941f23	Kyoto, Japan	Fujita, M., Kyoto, Japan; Miyachi, Y., Kyoto, Japan; Furukawa, F., Kyoto, Japan; Toichi, E., Kyoto, Japan; Furukawa, I., Kyoto, Japan; Nakajima, N., Kyoto, Japan; Imamura, S., Kyoto, Japan	Cutaneous T-cell lymphoma expressing γδ T-cell receptors (TCRs) is rare; only a few cases have been reported. We report another case of the disease that had a fatal outcome and differs from two previously reported cases in its clinical, histologic, and immunohistochemical aspects. The patient had multiple skin tumors with central crusts; she showed no response to chemotherapy and died within 1 ye…		cd1 antigen; cd3 antigen; cd30 antigen; cd4 antigen; cd8 antigen; HLA DR antigen; t lymphocyte receptor delta chain; t lymphocyte receptor gamma chain; adult; antigen detection; article; case report; clinical feature; female; histopathology; human tissue; immunohistochemistry; priority journal; skin lymphoma; t cell lymphoma; Antigens, CD; Case Report; Female; Human; Immunohistochemistry; Lymphom…		Antigens, CD; Receptors, Antigen, T-Cell, gamma-delta			Raulet, DH, The structure, function, and molecular genetics of the γ/δS T cell receptor (1989) Ann Rev Immunol, 7, pp. 175-207; Picker, LJ, Brenner, MB, Michie, S, Expression of T cell receptor delta chains in benign and malignant T lineage lymphoproliferations (1988) Am J Pathol, 132, pp. 401-405; Champagne, E, Takihara, Y, Sagman, U, The isolation of the human y chain gene and its expression in…	Fujita, M.; Department of Dermatology, Faculty of Medicine, Kyoto University, Kyoto, Japan								1909622			8436658	English	J. Am. Acad. Dermatol.	Article	Final		Scopus	2-s2.0-0027463690
Sobel E.S., Yokoyama W.M., Shevach E.M., Eisenberg R.A., Cohen P.L.	7103266204;7004807380;7102804155;57195874361;7402923672;	Aberrant expression of the very early activation antigen on MRL/Mp- lpr/lpr lymphocytes	1993	Journal of Immunology	150	2		673	682		10		https://www.scopus.com/inward/record.uri?eid=2-s2.0-0027251331&partnerID=40&md5=5665c8bdb1303f0a4b1f50a2ca855e8f	Division of Rheumatology/Immunology, 932 FLOB, CB 7280, Chapel Hill, NC 27599-7280, United States	Sobel, E.S., Division of Rheumatology/Immunology, 932 FLOB, CB 7280, Chapel Hill, NC 27599-7280, United States; Yokoyama, W.M., Division of Rheumatology/Immunology, 932 FLOB, CB 7280, Chapel Hill, NC 27599-7280, United States; Shevach, E.M., Division of Rheumatology/Immunology, 932 FLOB, CB 7280, Chapel Hill, NC 27599-7280, United States; Eisenberg, R.A., Division of Rheumatology/Immunology, 932 …	MRL/Mp-lpr/lpr (MRL/lpr) mice develop marked lymphadenopathy, characterized predominantly by Thy1+CD3+CD4-CD8- cells ('double negative T cells'; DNT). It is paradoxical that DNT proliferate poorly in vitro when stimulated through CD3 or by mitogens. The hamster mAb H1.2F3, raised against dendritic epidermal DNT, recognizes a very early activation (VEA) Ag, which is generally absent on resting cel…		cd3 antigen; cd4 antigen; cd8 antigen; lymphocyte antigen; animal cell; antigen expression; antigen recognition; article; cell proliferation; controlled study; cross linking; lymph node cell; lymphadenopathy; lymphocyte activation; mitogenicity; mouse; nonhuman; priority journal; t lymphocyte activation; thymocyte; Age Factors; Animal; Antigens, CD; Antigens, CD27; Antigens, CD4; Antigens, CD8; A…		Antigens, CD; Antigens, CD27; Antigens, CD4; Antigens, CD8; Antigens, Differentiation, T-Lymphocyte; CD69 antigen; Tetradecanoylphorbol Acetate, 16561-29-8				Sobel, E.S.; Division of Rheumatology/Immunology, 932 FLOB, CB 7280, Chapel Hill, NC 27599-7280, United States								221767		JOIMA	8380429	English	J. IMMUNOL.	Article	Final		Scopus	2-s2.0-0027251331
Volc-Platzer B., Anegg B., Milota S., Pickl W., Fischer G.	55897878000;6603073821;57199348362;7003646769;7401799438;	Accumulation of γδ T cells in chronic cutaneous lupus erythematosus	1993	Journal of Investigative Dermatology	100	1		S84	S91		42	10.1038/jid.1993.29	https://www.scopus.com/inward/record.uri?eid=2-s2.0-0027492306&doi=10.1038%2fjid.1993.29&partnerID=40&md5=d6bc989801942b577d71b5dd5d4bdcf4	Department of Dermatology, Division of Immunodermatology and Infectious Skin Diseases, University of Vienna, Austria; Institute of Blood Group Serology and Transfusion Medicine, University of Vienna, Austria	Volc-Platzer, B., Department of Dermatology, Division of Immunodermatology and Infectious Skin Diseases, University of Vienna, Austria; Anegg, B., Department of Dermatology, Division of Immunodermatology and Infectious Skin Diseases, University of Vienna, Austria; Milota, S., Department of Dermatology, Division of Immunodermatology and Infectious Skin Diseases, University of Vienna, Austria; Pick…	Monoclonal antibodies (moAbs) that recognize common or variable determinants of the γδ T-cell receptor (TcR) were used to assess γδ T-cell distribution on biopsy specimens and/ or peripheral blood leukocytes (PBL) from 30 patients suffering from chronic cutaneous lupus erythematosus (CCLE). CD3 +/γδ TcR+ T cells were evaluated in 15 biopsies from patients with CCLE lesions, their numbers varying …		antibiotic agent; hydroxychloroquine; steroid; clinical article; controlled study; human; human tissue; lupus erythematosus; priority journal; review; t lymphocyte; Alleles; Chronic Disease; Fluorescent Antibody Technique; HLA-DQ Antigens; HLA-DR Antigens; Human; Immunohistochemistry; Lupus Erythematosus, Cutaneous; Receptors, Antigen, T-Cell, gamma-delta; Support, Non-U.S. Gov't; T-Lymphocytes		hydroxychloroquine, 118-42-3, 525-31-5; HLA-DQ Antigens; HLA-DR Antigens; Receptors, Antigen, T-Cell, gamma-delta				Volc-Platzer, B.; Department of Dermatology, Division of Immunodermatology and Infectious Skin Diseases, University of ViennaAustria								0022202X		JIDEA	8423404	English	J. Invest. Dermatol.	Article	Final	Open Access	Scopus	2-s2.0-0027492306
Shiohara T., Moriya N., Hayakawa J., Arahari K., Yagita H., Nagashima M., Ishikawa H.	7005668489;7004548893;55684446000;6507197374;55192275000;7202442789;7404012778;	Bone marrow-derived dendritic epidermal T cells express T cell receptor- αβ/CD3 and CD8: Evidence for their extrathymic maturation	1993	Journal of Immunology	150	10		4323	4330		18		https://www.scopus.com/inward/record.uri?eid=2-s2.0-0027151869&partnerID=40&md5=161456fa6bf5cb1fcae885e73297443e	Department of Dermatology, Kyorin University School of Medicine, 6-20-2 Shinkawa, Mitaka, Tokyo 181, Japan	Shiohara, T., Department of Dermatology, Kyorin University School of Medicine, 6-20-2 Shinkawa, Mitaka, Tokyo 181, Japan; Moriya, N., Department of Dermatology, Kyorin University School of Medicine, 6-20-2 Shinkawa, Mitaka, Tokyo 181, Japan; Hayakawa, J., Department of Dermatology, Kyorin University School of Medicine, 6-20-2 Shinkawa, Mitaka, Tokyo 181, Japan; Arahari, K., Department of Dermatol…	The majority of murine Thy-1+ dendritic epidermal T cells (DETC) express virtually identical TCR encoded by Vγ5 and Vδ1 genes and are derived from early fetal thymic precursors. However, not consistent with this notion is an early finding that DETC arise continuously from bone marrow (BM) precursors by a thymus-independent mechanism. To address this issue, donor-type DETC were characterized in le…		CD3 antigen; CD4 antigen; CD8 antigen; T lymphocyte receptor alpha chain; T lymphocyte receptor beta chain; animal cell; antigen expression; article; bone marrow; cell maturation; chimera; epidermis; female; immunofluorescence; lymphocyte migration; lymphoid cell; mouse; nonhuman; priority journal; stem cell; T lymphocyte subpopulation; thymocyte; Animal; Antigens, CD3; Antigens, CD8; Antigens, S…		Antigens, CD3; Antigens, CD8; Antigens, Surface; Antigens, Thy-1; Membrane Glycoproteins; Receptors, Antigen, T-Cell, alpha-beta				Shiohara, T.; Department of Dermatology, Kyorin University School of Medicine, 6-20-2 Shinkawa, Mitaka, Tokyo 181, Japan								221767		JOIMA	8097753	English	J. IMMUNOL.	Article	Final		Scopus	2-s2.0-0027151869
Mathew P.A., Garni-Wagner B.A., Land K., Takashima A., Stoneman E., Bennett M., Kumar V.	7103227741;6603012958;57196602048;7103299656;6505869193;7403467973;7404634888;	Cloning and characterization of the 2B4 gene encoding a molecule associated with non-MHC-restricted killing mediated by activated natural killer cells and T cells	1993	Journal of Immunology	151	10		5328	5337		186		https://www.scopus.com/inward/record.uri?eid=2-s2.0-0027383871&partnerID=40&md5=38b03cf3e9b86af28eca79ea06a3b10f	Department of Pathology, Texas Univ. Southwestern Med. Ctr., 5323 Harry Hines Boulevard, Dallas, TX 75235-9072, United States	Mathew, P.A., Department of Pathology, Texas Univ. Southwestern Med. Ctr., 5323 Harry Hines Boulevard, Dallas, TX 75235-9072, United States; Garni-Wagner, B.A., Department of Pathology, Texas Univ. Southwestern Med. Ctr., 5323 Harry Hines Boulevard, Dallas, TX 75235-9072, United States; Land, K., Department of Pathology, Texas Univ. Southwestern Med. Ctr., 5323 Harry Hines Boulevard, Dallas, TX 7…	We have recently described a signal transducing molecule, 2B4, expressed on all NK and T cells that mediate non-MHC-restricted killing. The gene encoding this molecule was cloned and its nucleotide sequence determined. The encoded protein of 398 amino acids has a leader peptide of 18 amino acids and a transmembrane region of 24 amino acids. The predicted protein has eight N- linked glycosylation …		amino acid sequence; animal cell; article; cell killing; chromosome 1; dna determination; gene mapping; major histocompatibility complex; molecular cloning; mouse; natural killer cell; nonhuman; northern blotting; nucleotide sequence; priority journal; sequence homology; southern blotting; t lymphocyte; Amino Acid Sequence; Animal; Base Sequence; Cells, Cultured; Chromosome Mapping; Cloning, Mole…		DNA, Complementary; natural killer cell receptor 2B4, 91609-71-1; Proteins; RNA, Messenger				Kumar, V.; Department of Pathology, Texas Univ. Southwestern Med. Ctr., 5323 Harry Hines Boulevard, Dallas, TX 75235-9072, United States								221767		JOIMA	8228228	English	J. IMMUNOL.	Article	Final		Scopus	2-s2.0-0027383871
HogenEsch H., de Geus B., Tielen F., Rozing J.	16150599500;6701860022;6603611222;57190326944;	Constitutive expression of LY-6.A2 on murine keratinocytes and inducible expression on TCRγδ+ dendritic epidermal T cells	1993	Journal of Dermatological Science	5	2		114	121		4	10.1016/0923-1811(93)90079-5	https://www.scopus.com/inward/record.uri?eid=2-s2.0-0027227986&doi=10.1016%2f0923-1811%2893%2990079-5&partnerID=40&md5=488f47f0369713a9021ffdfe977cd3dc	Department of Pathology and Immunology, TNO-Institute for Aging and Vascular Research, Leiden, Netherlands	HogenEsch, H., Department of Pathology and Immunology, TNO-Institute for Aging and Vascular Research, Leiden, Netherlands; de Geus, B., Department of Pathology and Immunology, TNO-Institute for Aging and Vascular Research, Leiden, Netherlands; Tielen, F., Department of Pathology and Immunology, TNO-Institute for Aging and Vascular Research, Leiden, Netherlands; Rozing, J., Department of Pathology…	We investigated the expression of Ly-6.A2 on isolated murine epidermal cells by flow cytometry. Ly-6.A2 was expressed on 61% of keratinocytes and 6% of dendritic epidermal T cells of C57BL mice. Phosphatidylinositol-specific phospholipase C removed Ly-6.A2, indicating that the antigen is anchored to the keratinocyte membrane via a glycosyl-phosphatidylinositol anchor similar to its attachment to …	Epidermis; Glycosyl-phosphatidylinositol; Keratinocytes; Ly-6; Thy-1	phorbol 13 acetate 12 myristate; phorbol ester; phospholipase c; animal tissue; article; dendritic cell; flow cytometry; gene expression; keratinocyte; male; mouse; nonhuman; t lymphocyte; Animal; Antibodies, Monoclonal; Antigens, Ly; Antigens, Surface; Antigens, Thy-1; Cell Membrane; Dendritic Cells; Epidermis; Flow Cytometry; Gene Expression Regulation; Immunohistochemistry; Keratinocytes; Male…		phorbol 13 acetate 12 myristate, 16561-29-8; phospholipase C, 9001-86-9; 1-phosphatidylinositol phosphodiesterase, EC 3.1.4.10; Antibodies, Monoclonal; Antigens, Ly; Antigens, Surface; Antigens, Thy-1; Membrane Glycoproteins; Phosphoric Diester Hydrolases, EC 3.1.4; Receptors, Antigen, T-Cell, gamma-delta; Tetradecanoylphorbol Acetate, 16561-29-8		sigma	Shevach, Korty, Ly-6 A multigene family in search of a function (1989) Immunology Today, 10, pp. 195-200; Korty, Cohen, Shevach, A single cDNA encodes multiple Ly-6 antigenic specificities (1988) Eur J Immunol, 18, pp. 1631-1634; Yeh, Reiser, Benacerraf, Rock, Expression of T-cell-activating protein in peripheral lymphocyte subsets (1986) Proc Natl Acad Sci USA, 83, pp. 7424-7428. , 2nd Edn; Dumo…	HogenEsch, H.; Department of Pathology and Immunology, TNO-Institute for Aging and Vascular Research, Leiden, Netherlands								9231811		JDSCE	8102878	English	J. Dermatol. Sci.	Article	Final		Scopus	2-s2.0-0027227986
Rouabhia M., Germain L., Bélanger F., Auger F.A.	7003906647;7004443252;7006572546;7005049270;	Cultured epithelium allografts: Langerhans cell nd thy-1+ dendritic epidermal cell depletion effects on allograft rejection	1993	Transplantation	56	2		259	264		39	10.1097/00007890-199308000-00001	https://www.scopus.com/inward/record.uri?eid=2-s2.0-0027220570&doi=10.1097%2f00007890-199308000-00001&partnerID=40&md5=22bfe633ca5678f0761e576829585fa7	Laboratoire de Recherche des Grands Br?lés, H?pital du Saint-Sacrement, Québec, G1S 4L8, Canada; The Departement de Chirurgie, Université Laval, Québec, G1K 7P4, Canada	Rouabhia, M., Laboratoire de Recherche des Grands Br?lés, H?pital du Saint-Sacrement, Québec, G1S 4L8, Canada, The Departement de Chirurgie, Université Laval, Québec, G1K 7P4, Canada; Germain, L., Laboratoire de Recherche des Grands Br?lés, H?pital du Saint-Sacrement, Québec, G1S 4L8, Canada, The Departement de Chirurgie, Université Laval, Québec, G1K 7P4, Canada; Bélanger, F., Laboratoire de Rec…	The effects of in vitro dendritic cell (DC) depletion on the survival of epidermal sheet allografts were studied in a murine model. Newborn (1–3 days old) mouse skin was used. Langerhans cell (LC) and Thy-1+ dendritic epidermal cell (Thy-1+ DEC) depletion was achieved using: (1) a prolonged culture period (7 days), or (2) the anti-IA and anti-Thy-1.2 mAbs followed by complement treatment. DC (LC …		alloantigen; major histocompatibility antigen; adolescent; animal cell; animal model; animal tissue; article; cell culture; controlled study; dendritic cell; graft rejection; graft survival; immunofluorescence; immunohistology; langerhans cell; lymphocytic infiltration; male; monocyte; mouse; newborn; nonhuman; priority journal; skin allograft; tissue necrosis; Animal; Antibodies; Antigens, Surfa…		Antibodies; Antigens, Surface; Antigens, Thy-1; Complement, 9007-36-7; Membrane Glycoproteins			Edelson, R.L., Fink, J.M., The immunologic function of the skin (1985) Sei Am, 252, p. 46; Longley, B.J., Braverman, I.M., Edelson, R.L., Immunology and the skin: Current concepts (1988) Ann NY Acad Sei, 548, p. 225; Streilein, J.W., Skin-associated lymphoid tissues (SALT): Origins and functions (1983) J Invest Dermatol, 12, p. 80; Aub?ck, J., Fritsch, P., Epidermal allografts in humans: An unatt…	Rouabhia, M.; Laboratoire de Recherche des Grands Br?lés, H?pital du Saint-Sacrement, 1050 Chemin Sainte-Foy, Québec, G1S 4L8, Canada								411337			8102819	English	Transplantation	Article	Final		Scopus	2-s2.0-0027220570
Bergstresser P.R., Cruz Jr. P.D., Takashima A.	7007054829;7101819524;7103299656;	Dendritic epidermal T cells: lessons from mice for humans	1993	Journal of Investigative Dermatology	100	1		S80	S83		35	10.1038/jid.1993.28	https://www.scopus.com/inward/record.uri?eid=2-s2.0-0027506701&doi=10.1038%2fjid.1993.28&partnerID=40&md5=ea0778be320e87f7c2b63c415fb45c9a	Department of Dermatology, University of Texas Southwestern Medical Center, Dallas, TX, United States	Bergstresser, P.R., Department of Dermatology, University of Texas Southwestern Medical Center, Dallas, TX, United States; Cruz Jr., P.D., Department of Dermatology, University of Texas Southwestern Medical Center, Dallas, TX, United States; Takashima, A., Department of Dermatology, University of Texas Southwestern Medical Center, Dallas, TX, United States	Dendritic epidermal T cells (DETC) in mice form part of a primitive system of epithelial-resident T cells characterized by the expression of γδ T-cell receptors (TCR). Critical attributes that characterize DETC include their highly restricted T-cell receptor gene utilization, proliferation and maturation within epidermis, a capacity to kill relevant skin-derived tumor targets, and the ability to …		animal cell; controlled study; dendritic cell; epidermis; immune status; mouse; nonhuman; priority journal; review; t lymphocyte; Animal; Cell Line; Dendritic Cells; Epidermis; Human; Mice; Phenotype; Receptors, Antigen, T-Cell, gamma-delta; Skin Diseases; Support, Non-U.S. Gov't; Support, U.S. Gov't, P.H.S.; T-Lymphocytes		Receptors, Antigen, T-Cell, gamma-delta				Bergstresser, P.R.; Department of Dermatology, University of Texas Southwestern Medical Center, Dallas, TX, United States								0022202X		JIDEA	8423402	English	J. Invest. Dermatol.	Article	Final	Open Access	Scopus	2-s2.0-0027506701
Sundberg J.P., Boggess D., Sundberg B.A., Beamer W.G., Shultz L.D.	7102582077;6601969078;7005002215;35478390000;35448374300;	Epidermal dendritic cell populations in the flaky skin mutant mouse	1993	Immunological Investigations	22	5		389	401		28	10.3109/08820139309063417	https://www.scopus.com/inward/record.uri?eid=2-s2.0-0027292441&doi=10.3109%2f08820139309063417&partnerID=40&md5=6719dd7d4473f9d31f5c5e37cfcd71bc	The Jackson Laboratory, 600 Main Street, Bar Harbor, ME, 04609, United States	Sundberg, J.P., The Jackson Laboratory, 600 Main Street, Bar Harbor, ME, 04609, United States; Boggess, D., The Jackson Laboratory, 600 Main Street, Bar Harbor, ME, 04609, United States; Sundberg, B.A., The Jackson Laboratory, 600 Main Street, Bar Harbor, ME, 04609, United States; Beamer, W.G., The Jackson Laboratory, 600 Main Street, Bar Harbor, ME, 04609, United States; Shultz, L.D., The Jackso…	Flaky skin (gene symbol: fsn) is an autosomal recessive mouse mutation that causes pathologic changes in the skin yielding a papulosquamous disease resembling human psoriasis. Preliminary studies of epidermal sheets from foot pads of fsn/fsn mice stained for Ia+ Langerhans cells (LC) or Thy-1+ dendritic epidermal cells (Thy-1+ DEC) indicated a rise in LC numbers at the time of weaning, when the s…		monoclonal antibody; thy 1 antigen; aging; animal cell; animal experiment; animal model; article; bone marrow; cell density; combined immunodeficiency; controlled study; dendritic cell; epidermis; female; langerhans cell; mouse; nonhuman; priority journal; psoriasis; Aging; Animal; Biological Markers; Cell Count; Dendritic Cells; Disease Models, Animal; Female; Langerhans Cells; Mice; Mice, Inbre…		Biological Markers			Baker, K.W., Habowsky, J.E.J., (1983) J Invest Dermatol, 80, pp. 104-107; Beamer, W.G., Maltais, L.J., Bernstein, S.E., (1987) Annual Scientific Report, pp. 92-93. , The Jackson Laboratory; Bergstresser, P.R., Tigelaar, R.E., Dees, J.H., Streilein, J.W., (1983) J Invest Dermatol, 81, pp. 286-288; Breathnach, A.S., (1980) J Invest Dermatol, 75, pp. 6-11; Breathnach, S.M., Katz, S.I., (1984) J Inve…	Sundberg, J.P.; The Jackson Laboratory, 600 Main Street, Bar Harbor, ME, 04609, United States			Informa Healthcare					8820139		IMINE	8406628	English	Immunol. Invest.	Article	Final		Scopus	2-s2.0-0027292441
Heyborne K., Fu Y.-X., Kalataradi H., Reardon C., Roark C., Eyster C., Vollmer M., Born W., O'Brien R.	6603914521;7404433417;6506034024;7005435553;7003844452;6603561545;7006052815;7101772244;35501495800;	Evidence that murine Vγ5 and Vγ6 γδ-TCR+ lymphocytes are derived from a common distinct lineage	1993	Journal of Immunology	151	9		4523	4527		37		https://www.scopus.com/inward/record.uri?eid=2-s2.0-0027332271&partnerID=40&md5=5565599c35726b6c8eef3f59beb8ed05	Department of Obstetrics/Gynecology, Univ. of Colorado Hlth. Sci. Center, 4200 East Ninth Avenue, Denver, CO 80262, United States	Heyborne, K., Department of Obstetrics/Gynecology, Univ. of Colorado Hlth. Sci. Center, 4200 East Ninth Avenue, Denver, CO 80262, United States; Fu, Y.-X., Department of Obstetrics/Gynecology, Univ. of Colorado Hlth. Sci. Center, 4200 East Ninth Avenue, Denver, CO 80262, United States; Kalataradi, H., Department of Obstetrics/Gynecology, Univ. of Colorado Hlth. Sci. Center, 4200 East Ninth Avenue…	Murine Vγ5 and Vγ6+ T lymphocytes develop sequentially in the thymus during fetal and newborn life, giving rise to intraepithelial lymphocytes of the epidermis and female reproductive tract. In analyzing a panel of γδ T cell hybridomas derived from various tissues, we found that all Vγ6+ cells tested (n = 25) expressed Vγ5-Cγ1 mRNA, whereas none of a panel of Vγ6- cells analyzed (n = 33) expresse…		messenger RNA; T lymphocyte receptor; animal cell; article; controlled study; gene rearrangement; hybridoma; lymphocyte differentiation; lymphocyte subpopulation; mouse; nonhuman; priority journal; stem cell; T lymphocyte; T lymphocyte receptor gene; Animal; Gene Rearrangement, gamma-Chain T-Cell Antigen Receptor; Hybridomas; Mice; Mice, Inbred C57BL; Receptors, Antigen, T-Cell, gamma-delta; RNA,…		Receptors, Antigen, T-Cell, gamma-delta; RNA, Messenger				Heyborne, K.; Department of Obstetrics/Gynecology, Univ. of Colorado Hlth. Sci. Center, 4200 East Ninth Avenue, Denver, CO 80262, United States								221767		JOIMA	8409415	English	J. IMMUNOL.	Article	Final		Scopus	2-s2.0-0027332271
Kaminski M.J., Bergstresser P.R., Takashima A.	57198247932;7007054829;7103299656;	In vivo activation of mouse dendritic epidermal T cells in sites of contact dermatitis	1993	European Journal of Immunology	23	7		1715	1718		26	10.1002/eji.1830230748	https://www.scopus.com/inward/record.uri?eid=2-s2.0-0027239596&doi=10.1002%2feji.1830230748&partnerID=40&md5=1c5ce8c740236fc7cd2eabe124d5617b	Department of Dermatology, University of Texas Southwestern Medical Center Dallas, United States; Department of Dermatology, Medical College of Virginia, Richmond, Virginia, United States	Kaminski, M.J., Department of Dermatology, University of Texas Southwestern Medical Center Dallas, United States, Department of Dermatology, Medical College of Virginia, Richmond, Virginia, United States; Bergstresser, P.R., Department of Dermatology, University of Texas Southwestern Medical Center Dallas, United States; Takashima, A., Department of Dermatology, University of Texas Southwestern M…	Adult mouse epidermis contains a population of dendritic,Thy‐l+,CD3+,CD4?, CD8? and T cell receptor (TcR) Vγ3/Vδ1+ leukocytes termed dendritic epidermal T cells (DETC). DETC isolated from skin and placed into culture will proliferative vigorously in response to T cell mitogens and T cell growth factors. In the present study, we examined whether DETC can be activated in situ by modulating their ep…		croton oil; interleukin 2; irritant agent; t lymphocyte receptor; animal cell; animal experiment; article; contact dermatitis; controlled study; dendritic cell; effector cell; epidermis cell; female; lymphocyte culture; lymphocyte proliferation; mouse; nonhuman; priority journal; t lymphocyte activation; Animal; Cells, Cultured; Croton Oil; Dendritic Cells; Dermatitis, Contact; Epidermis; Female;…		croton oil, 8001-28-3; interleukin 2, 85898-30-2; Croton Oil, 8001-28-3; Receptors, Antigen, T-Cell, alpha-beta			Bergstresser, P.R., Tigelaar, R.E., Dees, J.H., Streilein, J.W., (1983) J. Invest. Dermatol., 81, p. 286; Tschachler, E., Schuler, D., Hutterer, J., Leibl, H., Wolff, K., Stingl, G., (1983) J. Invest. Dermatol., 81, p. 282; Havran, W.L., Poenie, M., Tigelaar, R.E., Tsien, R.Y., Allison, J.P., (1989) J. Immunol., 142, p. 1422; Steiner, G., Koning, E., Elbe, A., Tschachler, E., Yokoyama, W.M., Shev…	Takashima, A.; Department of Dermatology, University of Texas Southwestern Medical Center, 5323 Harry Hines Blvd, Dallas, Texas, 75235, United States								142980			8325341	English	Eur. J. Immunol.	Article	Final		Scopus	2-s2.0-0027239596
Nakagawa S., Hara M., Seki M., Yagita H., Tagami H., Aiba S.	55708489000;7403348802;7402040348;55192275000;7101834005;35393575200;	Interaction of cutaneous stromal cells and γ/δ T cell receptor (TcR)‐positive cells. I. Vγ5?γ/γTcR+ T cells migrating from organ‐cultured murine skin proliferate by co‐culture with cutaneous stromal cells in the presence of interleukin‐2	1993	European Journal of Immunology	23	7		1705	1710		6	10.1002/eji.1830230746	https://www.scopus.com/inward/record.uri?eid=2-s2.0-0027203288&doi=10.1002%2feji.1830230746&partnerID=40&md5=4bc3cddc2ebd861af51847c90eb80afc	Department of Dermatology, Tohoku University School of Medicine, Sendai, Japan; Department of Immunology, Juntendo University School of Medicine, Tokyo, Japan	Nakagawa, S., Department of Dermatology, Tohoku University School of Medicine, Sendai, Japan; Hara, M., Department of Dermatology, Tohoku University School of Medicine, Sendai, Japan; Seki, M., Department of Immunology, Juntendo University School of Medicine, Tokyo, Japan; Yagita, H., Department of Immunology, Juntendo University School of Medicine, Tokyo, Japan; Tagami, H., Department of Dermato…	It has been reported that Thy‐1+CD3+CD4?CD8? cells as well as Langerhans cells migrate from organ‐cultured murine skin into culture medium. We examined whether these Thy‐1+ populations of migrating cells were derived from Thy‐l+ dendritic epidermal T cells (Thy‐1+ DEC) and found that they were Thy‐1+CD3+ CD4?CD8?γ/ΔTcR+ (γΔ+T) cells but did not express Vγ/5TcR, which was used by a vast majority o…	Cutaneous stromal cell; Murine skin; Vγ5?γ; δTcR+ T cells	interleukin 2; t lymphocyte receptor; animal cell; article; cell interaction; cell migration; controlled study; female; fibroblast culture; flow cytometry; lymphocyte proliferation; mouse; nonhuman; organ culture; phenotype; polymerase chain reaction; priority journal; skin fibroblast; stroma cell; t lymphocyte subpopulation; Animal; Base Sequence; Cell Movement; Female; Flow Cytometry; Gene Expr…		interleukin 2, 85898-30-2; Interleukin-2; Oligodeoxyribonucleotides; Receptors, Antigen, T-Cell, gamma-delta; RNA, Messenger			Bergstresser, P.R., Tigelaar, R.E., Dees, J.H., Streilein, J.W., (1983) J. Invest. Dermatol., 81, p. 286; Tschachler, E., Schuler, G., Hutterer, J., Leibl, H., Wolff, K., Stingl, G., (1983) J. Invest. Dermatol., 81, p. 282; Romani, N., Stingl, G., Tschachler, E., Witmer, M.D., Stein‐man, R.M., Shevach, E., Schuller, G., (1985) J. Exp. Med., 161, p. 1368; Stingl, G., Koning, F., Yamada, H., Yokoya…	Aiba, S.; Department of Dermatology, Tohoku University School of Medicine, Sendai, 980, Japan								142980			8325340	English	Eur. J. Immunol.	Article	Final		Scopus	2-s2.0-0027203288
Leclercq G., Plum J., Nandi D., Smedt M.D., Allison J.P.	7102003388;7007064115;57204313927;36593477300;7401475344;	Intrathymic Differentiation of Vγ3 T Cells	1993	Journal of Experimental Medicine	178	1		309	315		41	10.1084/jem.178.1.309	https://www.scopus.com/inward/record.uri?eid=2-s2.0-0027254486&doi=10.1084%2fjem.178.1.309&partnerID=40&md5=f655393d1071c0ddccf8e0c12c62079c	Laboratory of Bacteriology, Virology and Immunology, University Hospital Gent, Gent, B-9000, Belgium; Department of Molecular and Cell Biology, University of California at Berkele, Berkeley, CA, 94720, United States	Leclercq, G., Laboratory of Bacteriology, Virology and Immunology, University Hospital Gent, Gent, B-9000, Belgium; Plum, J., Laboratory of Bacteriology, Virology and Immunology, University Hospital Gent, Gent, B-9000, Belgium; Nandi, D., Department of Molecular and Cell Biology, University of California at Berkele, Berkeley, CA, 94720, United States; Smedt, M.D., Laboratory of Bacteriology, Viro…	Whereas there is considerable information on the phenotypic and functional maturation of T cell receptor (TCR) α/β thymocytes, comparatively little is known of the maturational processes that affect development of TCR-γ/δ thymocytes. One class of γ/δ T cells, those bearing the Vγ3 gene product, are generated only during the early fetal stages of thymic development, and then migrate to the skin. H…		cd45 antigen; cd5 antigen; cyclosporin a; gene product; l selectin; t lymphocyte receptor; adolescent; animal cell; animal tissue; antigen expression; article; combined immunodeficiency; controlled study; embryo; fetus; fetus development; flow cytometry; lymphocyte differentiation; mouse; nonhuman; priority journal; receptor upregulation; t lymphocyte subpopulation; thymocyte; thymus; Animal; Cel…		cyclosporin A, 59865-13-3, 63798-73-2; L selectin, 126880-86-2; Cyclosporine, 59865-13-3; Receptors, Antigen, T-Cell, gamma-delta			Nikolic-Zugic, J., Phenotypic and functional stages in the intrathymic development of a$ T cells (1991) Immunol. Today., 12, p. 65; Jenkins, M.K., Schwartz, R.H., Pardoll, D.M., Effects of cyclosporin A on T cell development and clonal deletion (1988) Science (Wash. DC)., 241, p. 1655; Kosugi, A., Zuniga-Pflucker, J.C., Sharrow, S.O., Kruis-Beek, A.M., Shearer, G.M., Effect of cyclosporin A on ly…	Allison, J.P.; Division of Immunology, Department of Molecular and Cell Biology, Cancer Research Laboratory, University of California, Berkeley, CA, 94720, United States								221007			8315386	English	J. Exp. Med.	Article	Final	Open Access	Scopus	2-s2.0-0027254486
Matsue H., Bergstresser P.R., Takashima A.	42961757300;7007054829;7103299656;	Keratinocyte-derived IL-7 serves as a growth factor for dendritic epidermal T cells in mice	1993	Journal of Immunology	151	11		6012	6019		107		https://www.scopus.com/inward/record.uri?eid=2-s2.0-0027378758&partnerID=40&md5=724c8d4a7b4dda599daadca5d52805f6	Department of Dermatology, Texas Univ. Southwestern Med. Ctr., 5323 Harry Hines Blvd., Dallas, TX 75235, United States	Matsue, H., Department of Dermatology, Texas Univ. Southwestern Med. Ctr., 5323 Harry Hines Blvd., Dallas, TX 75235, United States; Bergstresser, P.R., Department of Dermatology, Texas Univ. Southwestern Med. Ctr., 5323 Harry Hines Blvd., Dallas, TX 75235, United States; Takashima, A., Department of Dermatology, Texas Univ. Southwestern Med. Ctr., 5323 Harry Hines Blvd., Dallas, TX 75235, United …	Dendritic epidermal T cells (DETC) are CD3+, CD45+, CD4-, CD8-, TCR- Vγ3/Nδ1- T lymphocytes that reside in symbiosis with keratinocytes in mouse epidermis. To address mechanisms by which these cells survive and proliferate within the epidermal environment, we have tested the hypothesis that cytokines secreted by neighboring keratinocytes play relevant roles. The present study was conducted to det…		growth factor; interleukin 7; animal cell; article; cell isolation; cell proliferation; cell survival; dendritic cell; dose response; hypothesis; keratinocyte; mouse; nonhuman; polymerase chain reaction; priority journal; symbiosis; t lymphocyte; Animal; Cell Line; Dendritic Cells; Epidermis; Interleukin-2; Interleukin-7; Keratinocytes; Mice; Mice, Inbred AKR; Mice, Inbred BALB C; Receptors, Anti…		Interleukin-2; Interleukin-7; Receptors, Antigen, T-Cell, gamma-delta				Takashima, A.; Department of Dermatology, Texas Univ. Southwestern Med. Ctr., 5323 Harry Hines Blvd., Dallas, TX 75235, United States								221767		JOIMA	8245446	English	J. IMMUNOL.	Article	Final		Scopus	2-s2.0-0027378758
Kaminski M.J., Cruz P.D., Jr., Bergstresser P.R., Takashima A.	57198247932;7101819524;7007054829;7103299656;	Killing of Skin-derived Tumor Cells by Mouse Dendritic Epidermal T-Cells	1993	Cancer Research	53	17		4014	4019		55		https://www.scopus.com/inward/record.uri?eid=2-s2.0-0027293952&partnerID=40&md5=a9fd68d7dd9397b85674e5cf749f820b	Department of Dermatology, University of Texas Southwestern Medical Center, Dallas, Texas 75235, United States	Kaminski, M.J., Department of Dermatology, University of Texas Southwestern Medical Center, Dallas, Texas 75235, United States; Cruz, P.D., Jr., Department of Dermatology, University of Texas Southwestern Medical Center, Dallas, Texas 75235, United States; Bergstresser, P.R., Department of Dermatology, University of Texas Southwestern Medical Center, Dallas, Texas 75235, United States; Takashima,…	Dendritic epidermal T-cells (DETC) are a unique population of T-cells that reside normally in mouse epidermis and express a y8 T-cell receptor. We have reported previously that DETC acquire in culture the capacity to lyse the YAC-1 lymphoma, a conventional target for natural killer cells. The aim of the present study was to characterize this cytotoxic potential, using a spectrum of skin-derived m…		chromium 51; interleukin 2; t lymphocyte receptor; animal cell; animal model; antigen recognition; article; cancer cell destruction; chromium 51 release; controlled study; dendritic cell; female; melanoma cell; mouse; natural killer cell; nonhuman; priority journal; skin cancer; skin carcinogenesis; t lymphocyte; t lymphocyte receptor gene; Animal; Cell Line, Transformed; Cytotoxicity, Immunologi…		chromium 51, 14392-02-0; interleukin 2, 85898-30-2			Scotto, J., Fears, T.R., Fraumeni, J.F., Jr., (1983) Incidence of non-melanoma skin cancer in the United States., pp. 1-113. , United States Department of Health and Human Service Publication, 83-2433:, Washington, DC: United States Government Printing Office; Hoover, R., Fraumeni, J.F., Risk of cancer in renal-transplant recipients (1973) Lancet, 2, p. 55; Greene, M.H., Young, T.I., Clark, W.H.,…	Takashima, A.; Department of Dermatology, University of Texas Southwestern Medical Center, 5323 Harry Hines Boulevard, Dallas, TX 75235, United States								85472			8358730	English	Cancer Res.	Article	Final		Scopus	2-s2.0-0027293952
Bigby M., Markowitz J.S., Bleicher P.A., Grusby M.J., Simha S., Siebrecht M., Wagner M., Nagler-Anderson C., Glimcher L.H.	7005216003;36485236300;7003596749;7006800988;6603285074;6602435525;56638757400;7003951898;35451230500;	Most γδ T cells develop normally in the absence of MHC class II molecules	1993	Journal of Immunology	151	9		4465	4475		58		https://www.scopus.com/inward/record.uri?eid=2-s2.0-0027332254&partnerID=40&md5=5633c1a1a7eea3450fa5bf8cf154c685	Cutaneous Biology Research Center, Department of Dermatology, Massachusetts General Hospital, Charlestown, MA, United States; Mucosal Immunology Laboratory, Dept. Pediat. Gastroenterol. Nutr., Massachusetts General Hospital, Charlestown, MA, United States; Department of Cancer Biology, Harvard School of Public Health, Boston, MA, United States; Department of Medicine, Harvard Medical School, Bost…	Bigby, M., Cutaneous Biology Research Center, Department of Dermatology, Massachusetts General Hospital, Charlestown, MA, United States, Cutaneous Biology Research Center, Massachusetts General Hospital-East, Building 149, 13th Street, Charlestown, MA 02129, United States; Markowitz, J.S., Department of Cancer Biology, Harvard School of Public Health, Boston, MA, United States, Department of Medi…	MHC class I and class II molecules are essential for intrathymic maturation of a normal repertoire of αβ T cells. The development of γδ T cells may similarly require exposure to conventional MHC or MHC-like molecules for appropriate negative and positive selection. The availability of mice that are devoid of cell surface expression of MHC class II molecules allowed us to test directly the hypothe…		cd3 antigen; major histocompatibility antigen class 2; thy 1 antigen; animal cell; antigen expression; article; controlled study; dendritic cell; lymph node cell; lymphocyte subpopulation; major histocompatibility complex; mouse; nonhuman; priority journal; spleen lymphocyte; t lymphocyte; thymus; Animal; Antibodies, Monoclonal; Cells, Cultured; Female; Histocompatibility Antigens Class II; Intes…		Antibodies, Monoclonal; Histocompatibility Antigens Class II; Receptors, Antigen, T-Cell, gamma-delta				Bigby, M.; Cutaneous Biology Research Center, Massachusetts General Hospital-East, Building 149, 13th Street, Charlestown, MA 02129, United States								221767		JOIMA	8409413	English	J. Immunol.	Article	Final		Scopus	2-s2.0-0027332254
Soo Chung B., Bergstresser P.R., Takashima A.	24304136600;7007054829;7103299656;	Mouse dendritic epidermal t cells exhibit chemotactic migration toward PAM 212 keratinocyte culture supernatants	1993	Journal of Investigative Dermatology	101	3		371	376		6		https://www.scopus.com/inward/record.uri?eid=2-s2.0-0027275328&partnerID=40&md5=6c6c7fa3df18f401ed237d73a6288b7c	Department of Dermatology, University of Texas Southwestern Medical Center, Dallas, TX, United States	Soo Chung, B., Department of Dermatology, University of Texas Southwestern Medical Center, Dallas, TX, United States; Bergstresser, P.R., Department of Dermatology, University of Texas Southwestern Medical Center, Dallas, TX, United States; Takashima, A., Department of Dermatology, University of Texas Southwestern Medical Center, Dallas, TX, United States	Dendritic epidermal T cells (DETCs) are Thy-1+, CD45+, CD3+, CD4-, CD8-, and T-cell receptor-Vγ3/Vδ1+ leukocytes that reside normally in adult mouse skin. We have demonstrated previously that keratinocytes serve as adhesion substrates for DETCs, and that interleukin 7 (IL-7), which is produced by keratinocytes, serves as a growth factor for DETCs. The present study was conducted to address the me…	γδ T cell/locomotion/homing	granulocyte macrophage colony stimulating factor; interleukin 1alpha; interleukin 2; interleukin 4; interleukin 7; interleukin 8; tumor necrosis factor alpha; animal cell; article; controlled study; female; keratinocyte; lymphocyte migration; mouse; nonhuman; priority journal; t lymphocyte; Animal; Cells, Cultured; Chemotaxis, Leukocyte; Cytokines; Dendritic Cells; Female; Flow Cytometry; Hydroxy…		interleukin 2, 85898-30-2; interleukin 8, 114308-91-7; Cytokines; Hydroxyeicosatetraenoic Acids; Interleukin-1; Interleukin-8; Leukotriene B4, 71160-24-2; Recombinant Proteins		genzyme, United States; r and d systems, United States		Takashima, A.; Department of Dermatology, University of Texas Southwestern Medical Center, Dallas, TX, United States								0022202X		JIDEA	8396609	English	J. Invest. Dermatol.	Article	Final		Scopus	2-s2.0-0027275328
Cooper K.D., Duraiswamy N., Hammerberg C., Allen E., Kimbrough-Green C., Dillon W., Thomas D.	55094660300;6505909808;7004594250;35512718800;6507363515;7102981645;57060650400;	Neutrophils, differentiated macrophages, and monocyte/macrophage antigen presenting cells infiltrate murine epidermis after UV injury	1993	Journal of Investigative Dermatology	101	2		155	163		87	10.1111/1523-1747.ep12363639	https://www.scopus.com/inward/record.uri?eid=2-s2.0-0027260841&doi=10.1111%2f1523-1747.ep12363639&partnerID=40&md5=fd4b0efaa093d822d598e8a2471466c3	Immunodermatology Unit, Department of Dermatology, University of Michigan, Ann Arbor, United States; Ann Arbor Veterans Administration Hospital, University of Michigan, Ann Arbor, MI, United States; Department of Microbiology and Immunology, University of Michigan, Ann Arbor, MI, United States	Cooper, K.D., Immunodermatology Unit, Department of Dermatology, University of Michigan, Ann Arbor, United States, Ann Arbor Veterans Administration Hospital, University of Michigan, Ann Arbor, MI, United States; Duraiswamy, N., Immunodermatology Unit, Department of Dermatology, University of Michigan, Ann Arbor, United States; Hammerberg, C., Immunodermatology Unit, Department of Dermatology, Un…	We asked whether, as in humans, a population of antigen-presenting macrophages infiltrates the epidermis of ultraviolet (UV)-exposed BALB/c mice. Using three-color flow cytometry on cell suspensions plus in situ immunofluorescence microscopy, the phenotype of normal Langerhans cells was class II major histocompatibility complex (MHC+), CD11b+, NLDC-145+, BM8+ CD45+ and homogeneous. By contrast, i…	antigen-presenting cells; contact sensitivity; macrophages; UV	1 fluoro 2,4 dinitrobenzene; animal experiment; animal tissue; antigen presenting cell; article; contact sensitivity; controlled study; flow cytometry; macrophage; male; mouse; neutrophil; nonhuman; priority journal; topical drug administration; ultraviolet radiation; Animal; Antigen-Presenting Cells; Cell Differentiation; Dermatitis, Contact; Epidermis; Flow Cytometry; Fluorescent Antibody Techn…		1 fluoro 2,4 dinitrobenzene, 25376-51-6, 70-34-8; Histocompatibility Antigens Class II; Macrophage-1 Antigen		sigma		Cooper, K.D.; Immunodermatology Unit, Department of Dermatology, University of Michigan, Ann Arbor, United States								0022202X		JIDEA	8393901	English	J. Invest. Dermatol.	Article	Final	Open Access	Scopus	2-s2.0-0027260841
Matsue H., Cruz Jr. P.D., Bergstresser P.R., Takashima A.	42961757300;7101819524;7007054829;7103299656;	Profiles of cytokine mrna expressed by dendritic epidermal T cells in mice	1993	Journal of Investigative Dermatology	101	4		537	542		51	10.1111/1523-1747.ep12365917	https://www.scopus.com/inward/record.uri?eid=2-s2.0-0027490120&doi=10.1111%2f1523-1747.ep12365917&partnerID=40&md5=3f12bed101a5ec97b6ceef709c4f0fed	Department of Dermatology, University of Texas Southwestern Medical Center, Dallas, TX, United States	Matsue, H., Department of Dermatology, University of Texas Southwestern Medical Center, Dallas, TX, United States; Cruz Jr., P.D., Department of Dermatology, University of Texas Southwestern Medical Center, Dallas, TX, United States; Bergstresser, P.R., Department of Dermatology, University of Texas Southwestern Medical Center, Dallas, TX, United States; Takashima, A., Department of Dermatology, …	The epidermis of mice contains, in addition to Langerhans cells, a second dendritic population that is Thy-1+/CD3+/ CD4-/CD8-/T-cell receptor-Vγ3/Vδ1+. These dendritic epidermal γδ T cells (DETC) are now thought to comprise one element in the family of epithelial tissue-resident γδ T cells. In the present study, DETCs were examined for their expression of mRNA for cytokines, using a reverse trans…	cytokine/dendritic epidermal T cells/γδ T cells	concanavalin a; gamma interferon; interleukin 2; interleukin 4; messenger rna; animal cell; article; controlled study; dendritic cell; epidermis; female; mouse; nonhuman; priority journal; t lymphocyte; Animal; Cell Line; Cell Separation; Cytokines; Dendritic Cells; Epidermis; Mice; Polymerase Chain Reaction; RNA, Messenger; Support, Non-U.S. Gov't; Support, U.S. Gov't, P.H.S.; T-Lymphocytes; Tim…		concanavalin A, 11028-71-0; gamma interferon, 82115-62-6; interleukin 2, 85898-30-2; Cytokines; RNA, Messenger				Takashima, A.; Department of Dermatology, University of Texas Southwestern Medical Center, Dallas, TX, United States								0022202X		JIDEA	8409520	English	J. Invest. Dermatol.	Article	Final	Open Access	Scopus	2-s2.0-0027490120
Matsue H., Bergstresser P.R., Takashima A.	42961757300;7007054829;7103299656;	Reciprocal cytokine-mediated cellular interactions in mouse epidermis: promotion of γδ t-cell growth by il-7 and tnfα and inhibition of keratinocyte growth by γifn	1993	Journal of Investigative Dermatology	101	4		543	548		38	10.1111/1523-1747.ep12365938	https://www.scopus.com/inward/record.uri?eid=2-s2.0-0027424517&doi=10.1111%2f1523-1747.ep12365938&partnerID=40&md5=67f6dcba17a4de1b4623032402d79f15	Department of Dermatology, University of Texas Southwestern Medical Center, Dallas, TX, United States	Matsue, H., Department of Dermatology, University of Texas Southwestern Medical Center, Dallas, TX, United States; Bergstresser, P.R., Department of Dermatology, University of Texas Southwestern Medical Center, Dallas, TX, United States; Takashima, A., Department of Dermatology, University of Texas Southwestern Medical Center, Dallas, TX, United States	A unique subset of γδ T cells, termed dendritic epidermal T cells (DETC), resides in symbiosis with keratinocytes in mouse epidermis. We have shown previously that interleukin 7 (IL-7) which is produced by keratinocytes, promotes growth and prevents apoptosis in DETC. To extend this observation, we examined 12 cytokines, each of which is expressed by epidermal cells at mRNA and/or protein levels,…	epidermal γδ T cell/keratinocyte/growth/cytokine	dexamethasone; recombinant gamma interferon; recombinant granulocyte macrophage colony stimulating factor; recombinant interleukin 1alpha; recombinant interleukin 1beta; recombinant interleukin 2; recombinant interleukin 3; recombinant interleukin 4; recombinant interleukin 5; recombinant interleukin 6; recombinant interleukin 7; recombinant lymphotoxin; recombinant macrophage inflammatory protei…		dexamethasone, 50-02-2; recombinant granulocyte macrophage colony stimulating factor, 99283-10-0; recombinant interleukin 2, 110942-02-4; recombinant interleukin 3, 148641-02-5; Cytokines; Dexamethasone, 50-02-2; Interferon Type II, 82115-62-6; Interleukin-2; Interleukin-7; Tumor Necrosis Factor		bachem, United States; genzyme, United States; r and d systems, United States		Takashima, A.; Department of Dermatology, University of Texas Southwestern Medical Center, Dallas, TX, United States								0022202X		JIDEA	8409521	English	J. Invest. Dermatol.	Article	Final	Open Access	Scopus	2-s2.0-0027424517
Asarnow D.M., Cado D., Raulet D.H.	6603251177;6603833281;7006111540;	Selection is not required to produce invariant T-cell receptor γ-gene junctional sequences	1993	Nature	362	6416		158	160		85	10.1038/362158a0	https://www.scopus.com/inward/record.uri?eid=2-s2.0-0027399223&doi=10.1038%2f362158a0&partnerID=40&md5=18bac41fded7c9b21c2c25238ae7adce	Department of Molecular and Cell Biology, Division of Immunology, 489 LSA, University of California, Berkeley, CA 94720, United States	Asarnow, D.M., Department of Molecular and Cell Biology, Division of Immunology, 489 LSA, University of California, Berkeley, CA 94720, United States; Cado, D., Department of Molecular and Cell Biology, Division of Immunology, 489 LSA, University of California, Berkeley, CA 94720, United States; Raulet, D.H., Department of Molecular and Cell Biology, Division of Immunology, 489 LSA, University of…	RECOMBINATION of V-, D- and J-gene segments can generate an enormous diversity of T-cell antigen receptor (TCR) gene sequences1,2. Although many γδ T cells fully exploit this diversification process, those in the epidermal and vaginal epithelium do not3,4, predominantly expressing invariant γδ receptors in which the V-(D)-J junctional sequences in almost all the productive rearrangements are iden…		t lymphocyte receptor; animal tissue; article; gene rearrangement; gene sequence; genetic recombination; mouse; nonhuman; priority journal; thymus; transgenic mouse; Animal; Base Sequence; Crosses, Genetic; DNA; Enhancer Elements (Genetics); Female; Gene Frequency; Gene Rearrangement, gamma-Chain T-Cell Antigen Receptor; Male; Mice; Mice, Inbred C57BL; Mice, Inbred CBA; Mice, Transgenic; Molecula…		DNA, 9007-49-2; Oligodeoxyribonucleotides; Receptors, Antigen, T-Cell, gamma-delta			Atle, J.M., (1985) J. Neuro-Oncol, 3, pp. 197-202; New, D.A.T., (1971) Methods in Mammalian Embryology, pp. 305-319. , (ed. Daniel, J. C. Jr, Freeman, San Francisco; Van Maele-Fabry, G., Debras, J.P., Francois, I., Boucau, M., Picard, J., (1988) J. Archs Biol., 99, pp. 431-453; Gozes, I., Meltzer, E., Rubinrout, S., Brenneman, D.E., (1989) Endocrinology, 125, pp. 2945-2949; Gozes, I., (1991) J. P…	Raulet, D.H.; Department of Molecular and Cell Biology, Division of Immunology, 489 LSA, University of California, Berkeley, CA 94720, United States								280836			8383806	English		Article	Final		Scopus	2-s2.0-0027399223
Gaspari A.A., Ferbel B., Frelinger J.G.	7103367505;6505873724;7101767002;	Thy 1+ dendritic epidermal cells but not langerhans cells express Ly 48	1993	Journal of Investigative Dermatology	100	3		247	253		2	10.1111/1523-1747.ep12469016	https://www.scopus.com/inward/record.uri?eid=2-s2.0-0027417513&doi=10.1111%2f1523-1747.ep12469016&partnerID=40&md5=62ab6c18ee88c46f9cb7ffd77388ca25	Department of Dermatology, University of Rochester School of Medicine and Dentistry, Rochester, NY, United States; Cancer Center Immunology Unit, University of Rochester School of Medicine and Dentistry, Rochester, NY, United States; Department of Microbiology and Immunology, University of Rochester School of Medicine and Dentistry, Rochester, NY, United States	Gaspari, A.A., Department of Dermatology, University of Rochester School of Medicine and Dentistry, Rochester, NY, United States, Cancer Center Immunology Unit, University of Rochester School of Medicine and Dentistry, Rochester, NY, United States; Ferbel, B., Department of Dermatology, University of Rochester School of Medicine and Dentistry, Rochester, NY, United States; Frelinger, J.G., Depart…	Leukosialin (Ly 48) is a sialoprotein expressed by bone marrow-derived cells early in their development. To determine whether Ly 48 is expressed by specific subsets of epidermal cells (ECs) such as Langerhans cells, keratinocytes, or dendritic epidermal T cells (DETCs), we utilized flow cytometry to detect staining of ECs by a panel of four monoclonal antibodies (S11, S15, S7, and 3E8) that recog…		animal cell; animal tissue; article; controlled study; dendritic cell; gene expression; langerhans cell; mouse; nonhuman; priority journal; Animal; Antigens, CD; Antigens, Surface; Antigens, Thy-1; Cells, Cultured; Dendritic Cells; Epidermis; Langerhans Cells; Membrane Glycoproteins; Mice; Mice, Inbred BALB C; Mice, Inbred C3H; Sialoglycoproteins; Support, Non-U.S. Gov't; Support, U.S. Gov't, P.H…		Antigens, CD; Antigens, Surface; Antigens, Thy-1; Membrane Glycoproteins; Sialoglycoproteins; sialophorin; Trypsin, EC 3.4.21.4				Gaspari, A.A.; Department of Dermatology, University of Rochester School of Medicine and Dentistry, Rochester, NY, United States								0022202X		JIDEA	8095056	English	J. Invest. Dermatol.	Article	Final	Open Access	Scopus	2-s2.0-0027417513
Ueda A., Ito M., Ishiguro N., Miura Y., Asai J., Miura T.	56227838300;55726709200;34975067800;57209549240;7006246732;7402844833;	Thy-1 antigen dendritic cells and rejection of composite tissue limb allografts in rats	1993	Transplantation	56	1		124	127		3	10.1097/00007890-199307000-00023	https://www.scopus.com/inward/record.uri?eid=2-s2.0-0027295467&doi=10.1097%2f00007890-199307000-00023&partnerID=40&md5=15d1578bee5e8f337f22619f4eb2c684	Departments of Orthopaedic Surgery, Nagoya University School of Medicine, Showa-ku, Nagoya, 466, Japan; Departments of Pathology, Nagoya University School of Medicine, Showa-ku, Nagoya, 466, Japan	Ueda, A., Departments of Orthopaedic Surgery, Nagoya University School of Medicine, Showa-ku, Nagoya, 466, Japan; Ito, M., Departments of Pathology, Nagoya University School of Medicine, Showa-ku, Nagoya, 466, Japan; Ishiguro, N., Departments of Orthopaedic Surgery, Nagoya University School of Medicine, Showa-ku, Nagoya, 466, Japan; Miura, Y., Departments of Orthopaedic Surgery, Nagoya University…	Dendritic-shaped cells (Thy-1+DC) characterized by the surface phenotype of Thy-1+, asialo GM1+, Ia?are reported to exist exclusively in mice. However, Thy-1+ dendritic cells were observed in the skin of normal athymic nude F344, euthymic F344, and WKAH rats. Their phenotypic markers were Thy-1+, asialo GM1+, Ia?, W3/25 (helper/inducer)?, OX8 (cytotoxic/suppressor)?, W3/13 (pan T lymphocytes)?, O…		thy 1 antigen; allograft; animal experiment; animal model; article; controlled study; cytotoxic t lymphocyte; dendritic cell; graft rejection; graft survival; immunohistochemistry; male; nonhuman; nude mouse; priority journal; rat; skin transplantation; Animal; Antigens, Surface; Antigens, Thy-1; Dendritic Cells; Graft Rejection; Hindlimb; Male; Membrane Glycoproteins; Nerve Tissue Proteins; Rats…		Antigens, Surface; Antigens, Thy-1; Membrane Glycoproteins; Nerve Tissue Proteins			Kirby, S.B., Charles, W.H., Lesley, A.F., Composite tissue (Limb) allografts in rats. II Indefinite survival using low-dose cyclosporine (1985) Transplantation, 39, p. 365; Bruce, M.H., Cells mediating allograft rejection (1991) Transplantation, 51, p. 1141; Hotokebuchi, T., Arai, K., Takagishi, K., Limb allografts in rats immunosuppressed with cyclosporin: As a whole-joint allograft (1989) Plast…	Ueda, A.; Department of Orthopaedic Surgery, Nagoya University School of Medicine, 65 Tsurumai-cho, Showa-ku, Nagoya, Japan								411337			8101400	English	Transplantation	Article	Final		Scopus	2-s2.0-0027295467
Alaibac M., Chu A.C.	57195269564;55350341600;	T‐Lymphocytes bearing the γδ T‐cell receptor in cutaneous lesions of langerhans' cell histiocytosis	1993	Medical and Pediatric Oncology	21	5		347	349		7	10.1002/mpo.2950210507	https://www.scopus.com/inward/record.uri?eid=2-s2.0-0027194108&doi=10.1002%2fmpo.2950210507&partnerID=40&md5=dd4a36df73fff7d75bb8a83183221358	Unit of Dermatology, Royal Postgraduate Medical School, Hammersmith Hospital, London, United Kingdom	Alaibac, M., Unit of Dermatology, Royal Postgraduate Medical School, Hammersmith Hospital, London, United Kingdom; Chu, A.C., Unit of Dermatology, Royal Postgraduate Medical School, Hammersmith Hospital, London, United Kingdom	The aim of this study was to investigate the regional importance of γδ T cells in cutaneous lesions of Langerhans' cell histiocytosis. Six cases of Langerhans' cell histiocytosis were investigated by immunohistochemical techniques (alkaline phosphatase‐antialkaline phosphatase complex and indirect immunoperoxidase). Increase of γδ T cells was observed in 3 cases of Langerhans' cell histiocytosis.…	Langerhans' cell histiocytosis (LCH); T‐cell receptor (TCR); γδ T cells	alkaline phosphatase; cd3 antigen; monoclonal antibody; t lymphocyte receptor delta chain; t lymphocyte receptor gamma chain; antigen specificity; article; clinical article; histiocytosis x; human; human cell; human tissue; immunohistochemistry; immunoperoxidase staining; langerhans cell; priority journal; skin manifestation; t lymphocyte subpopulation; Antibodies, Monoclonal; Antibody Specificit…		Antibodies, Monoclonal; Receptors, Antigen, T-Cell, gamma-delta			Marrack, P, Pullen, AM, Herman, A, Callahan, J, Choi, Y, Potts, W, Wakeland, E, Kappler, IW, T‐Cell receptor (1989) Progress in Immunology. Proceedings of the 7th International Congress of Immunology, pp. 3-12. , Melchers F, (eds):, Berlin, Springer‐Verlag; Raulet, DH, The structure, function and molecular genetics of the γδ T‐Cell receptor (1989) Annu Rev Immunol, 7, pp. 175-207; Stingl, G, Koni…	Alaibac, M.; Unit of Dermatology, Royal Postgraduate Medical School, Hammersmith Hospital, Du Cane Road, London, W12, United Kingdom								981532			8492749	English	Med. Pediatr. Oncol.	Article	Final		Scopus	2-s2.0-0027194108
Lynch F., Shevach E.M.	7006407734;7102804155;	γδ T cells promote CD4 and CD8 expression by SCID thymocytes	1993	International Immunology	5	8		991	995		30	10.1093/intimm/5.8.991	https://www.scopus.com/inward/record.uri?eid=2-s2.0-0027328795&doi=10.1093%2fintimm%2f5.8.991&partnerID=40&md5=3bcf937fd9be78f76b64c03e1c69db41	Laboratory of Immunology, National Institute of Aliergy and Infectious Diseases, National Institutes of Health, Bethesda, MD 20892, United States	Lynch, F., Laboratory of Immunology, National Institute of Aliergy and Infectious Diseases, National Institutes of Health, Bethesda, MD 20892, United States; Shevach, E.M., Laboratory of Immunology, National Institute of Aliergy and Infectious Diseases, National Institutes of Health, Bethesda, MD 20892, United States	Molecular studies of the γδ TCR, which is expressed by a minor subpopulatlon of T lymphocytes in all vertebrate species, have defined a subset which expresses a receptor with extreme junctional diversity and a second subset, most commonly found in eplthella, which expresses a receptor of very limited diversity. In the developing murine thymus, γδ T cells appear in an ordered sequence of specific …	Dendritic epidermal T cells; SCID mice; T cell development; Thymus	CD3 antigen; CD4 antigen; CD8 antigen; cytokine; animal cell; animal experiment; animal tissue; antigen expression; article; combined immunodeficiency; controlled study; gene rearrangement; lymphoid cell line; mouse; nonhuman; priority journal; prolymphocyte; stem cell; T lymphocyte receptor gene; T lymphocyte subpopulation; thymocyte; thymus; Animal; Antigens, CD4; Antigens, CD8; Cell Differenti…		Antigens, CD4; Antigens, CD8; Receptors, Antigen, T-Cell, gamma-delta			Rautet, D.H., The structure, function, and molecular genetics of the 7/5 T cell receptor. Anna (1989) Rev. Immunol, 7, p. 175; Bluestone, J.A., Cron, R.Q., Barrett, T.A., Houlden, B., Sperling, A.I., Dent, A., Hedrick, S., Matis, L.A., Repertoire development and ligand specificity of murine TCR7?cells. Immunol (1991) Rev, 120, p. 5; Ferrick, D.A., Sydora, B., Wallace, V., Gemmell-Hori, L., Kronen…	Shevach, E.M.; Laboratory of Immunology, National Institute of Aliergy and Infectious Diseases, National Institutes of Health, Bethesda, MD 20892, United States								9538178		INIME	8398991	English	Int. Immunol.	Article	Final		Scopus	2-s2.0-0027328795
HERNANDO R.A., RUBY J.C., HALLIDAY G.M.	57191082229;7005775272;35353860100;	Changes in epidermal Langerhans cells, γδ T cells and CD4 T cells after intradermal infection with recombinant vaccinia virus expressing cytokine genes	1994	Immunology and Cell Biology	72	5		383	389		11	10.1111/j.1440-1711.1994.tb03806.x	https://www.scopus.com/inward/record.uri?eid=2-s2.0-0028143312&doi=10.1111%2fj.1440-1711.1994.tb03806.x&partnerID=40&md5=a34a111d5894b6d7e9608e0448fcce66	Department of Dermatology, University of Sydney, Royal Prince Alfred Hospital, Camperdown, New South Wales, Australia; Division of Cell Biology, John Curtin School of Medical Research, Australian National University, Canberra, Australian Capital Territory, Australia	HERNANDO, R.A., Department of Dermatology, University of Sydney, Royal Prince Alfred Hospital, Camperdown, New South Wales, Australia; RUBY, J.C., Division of Cell Biology, John Curtin School of Medical Research, Australian National University, Canberra, Australian Capital Territory, Australia; HALLIDAY, G.M., Department of Dermatology, University of Sydney, Royal Prince Alfred Hospital, Camperdo…	Langerhans cells (LC) play a critical role in cutaneous immunity, and whereas Thy‐1? dendritic epidermal cells (Thy‐1+ dEC) are also present in murine epidermis, their role remains unknown. Antigens and cytokines influence the number of LC found in the epidermis. However, there has been no investigation into the effects of particular cytokines during resolution of a viral infection. In order to s…	cytokines; dendritic cells; dendritic epidermal T cells; Langherhans cells; vaccinia virus; vaccinia virus constructs	cytokine; gamma interferon; interleukin 6; tumor necrosis factor alpha; animal experiment; article; dendritic cell; female; gene expression; langerhans cell; mouse; nonhuman; t lymphocyte; vaccinia virus; virus infection; virus recombinant; Animal; CD4-Positive T-Lymphocytes; Cell Count; Cytokines; Dendritic Cells; Epidermis; Female; Gene Expression; Langerhans Cells; Mice; Mice, Inbred BALB C; R…		gamma interferon, 82115-62-6; Cytokines; Receptors, Antigen, T-Cell, gamma-delta; Recombinant Proteins			Stingl, G., Shevach, E.M., Langerhans cells as antigen‐presenting cells (1991) Epidermal Langerhans Cells, pp. 159-190. , G. Schuler, CRC Press, Boca Raton, pp; Havran, W.L., Grell, S., Duwe, G., Limited diversity of T cell receptor γ‐chain expression of murine Thy‐1+ dendritic epidermal cells revealed by Vγ3‐ specific monoclonal antibody (1989) Natl Acad. Sci. USA, 86, pp. 4185-4189; Asarnow, D.…	HERNANDO, R.A.; Department of Dermatology, University of Sydney, Royal Prince Alfred Hospital, Camperdown, New South Wales, 2050, Australia								8189641			7835982	English	Immunol. Cell Biol.	Article	Final		Scopus	2-s2.0-0028143312
Love-Schimenti C.D., Kripke M.L.	6507284026;7101915890;	Dendritic epidermal T cells inhibit T cell proliferation and may induce tolerance by cytotoxicity	1994	Journal of Immunology	153	8		3450	3456		14		https://www.scopus.com/inward/record.uri?eid=2-s2.0-0028126558&partnerID=40&md5=c815cbc030c51ff21fc15eceeab91f10	Department of Immunology, University of Texas, M. D. Anderson Cancer Center, Houston, TX 77030, United States; Endocrine Unit, Univ. of California, San Francisco, Vet. Administration Medical Center, 4150 Clement St., San Francisco, CA 94121, United States; Department of Immunology, University of Texas, M. D. Anderson Cancer Center, 1515 Holcombe Boulevard, Houston, TX 77030, United States	Love-Schimenti, C.D., Department of Immunology, University of Texas, M. D. Anderson Cancer Center, Houston, TX 77030, United States, Endocrine Unit, Univ. of California, San Francisco, Vet. Administration Medical Center, 4150 Clement St., San Francisco, CA 94121, United States; Kripke, M.L., Department of Immunology, University of Texas, M. D. Anderson Cancer Center, Houston, TX 77030, United Sta…	Hapten-conjugated cells of the dendritic epidermal T cell (DETC) line AU16 induce specific immunologic tolerance in vivo and inhibit the proliferation of naive T cells in response to hapten-bearing dendritic cells in vitro. The purpose of this study was to test the hypothesis that these activities of DETC are mediated by a cytotoxic mechanism. In addition, because AU16 cells, unlike most DETC, ex…		t lymphocyte receptor; animal cell; animal experiment; antibody producing cell; article; cell line; controlled study; cytotoxicity; dendritic cell; dna synthesis; female; gamma irradiation; gene expression; immunological tolerance; lymphocyte proliferation; mouse; nonhuman; priority journal; t lymphocyte; Animals; Cytotoxicity, Immunologic; Dendritic Cells; Epidermis; Female; Immune Tolerance; Ly…		Receptors, Antigen, T-Cell, alpha-beta; Receptors, Antigen, T-Cell, gamma-delta			Tschachler, E., Schuler, G., Hutterer, J., Leibl, H., Wolff, K., Stingl, G., Expression of Thy-1 antigen by murine epidermal cells (1983) J. Invest. Dermatol., 81, p. 282; Bergstresser, P., Tigelaar, R.E., Dees, J.H., Streilein, J.W., Thy-1 antigen-bearing dendritic cells populate murine epidermis (1983) J. Invest. Dermatol., 81, p. 286; Havran, W.L., Grell, S., Duwe, G., Kimura, J., Wilson, A., …	Kripke, M.L.; Department of Immunology, Texas Univ. M. D. Anderson Can. Ctr., Box 178, 1515 Holcombe Boulevard, Houston, TX 77030, United States								221767		JOIMA	7930568	English	J. IMMUNOL.	Article	Final		Scopus	2-s2.0-0028126558
Lefran?ois L., Barrett T.A., Havran W.L., Puddington L.	25026096000;7202538514;7004541279;57207592711;	Developmental expression of the αIELβ7 integrin on T cell receptor γδ and T cell receptor αβ T cells	1994	European Journal of Immunology	24	3		635	640		87	10.1002/eji.1830240322	https://www.scopus.com/inward/record.uri?eid=2-s2.0-0028179952&doi=10.1002%2feji.1830240322&partnerID=40&md5=16b357129503e5e61344353f82cb8754	Department of Medicine, Division of Rheumatic Diseases, University of Connecticut Health Center, Farmington, United States; Department of Immunology, Scripps Clinic and Research Foundation, La Jolla, United States; Northwestern University Medical Center, Chicago, United States	Lefran?ois, L., Department of Medicine, Division of Rheumatic Diseases, University of Connecticut Health Center, Farmington, United States, Northwestern University Medical Center, Chicago, United States; Barrett, T.A., Department of Immunology, Scripps Clinic and Research Foundation, La Jolla, United States; Havran, W.L., Department of Medicine, Division of Rheumatic Diseases, University of Conne…	A novel monoclonal antibody, 2E7, was shown by immunoprecipitation to be reactive with the αIELβ7 integrin and was employed to analyze the expression of this integrin in lymphocyte subsets and during T cell ontogeny. In adult lymph nodes, αIEL was expressed at low levels by 40–70% of CD8+ T cells and &lt; 5% of CD4+ T cells. However, virtually all intestinal intraepithelial lymphocytes and ?20% o…	Integrin; Intraepithelial; T cell receptor; Thymus	cd4 antigen; cd8 antigen; integrin; monoclonal antibody; t lymphocyte receptor; animal cell; animal tissue; article; cell maturation; controlled study; immunohistochemistry; immunoprecipitation; intestine epithelium; lamina propria; lymph node; lymphocyte subpopulation; mouse; mucosa cell; nonhuman; ontogeny; priority journal; thymocyte; Animal; Antibodies, Monoclonal; Antigens, CD8; CD4-Positive…		Antibodies, Monoclonal; Antigens, CD8; integrin alphaEbeta7; Integrins; Receptors, Antigen, T-Cell, alpha-beta; Receptors, Antigen, T-Cell, gamma-delta			Hynes, R.O., (1992) Cell, 69, p. 11; Lefran?ois, L., LeCorre, R., Mayo, J., Bluestone, J.A., Goodman, T., (1990) Cell, 63, p. 333; Lefran?ois, L., (1991) Immunol. Today, 12, p. 436; Rocha, B., Vassalli, P., Guy‐Grand, D., (1991) J. Exp. Med., 173, p. 483; Whetsell, M., Mosley, R.L., Whetsell, L., Schaefer, F.V., Miller, K.S., Klein, J.R., (1991) Mol. Cell Biol., 11, p. 5902; Poussier, P., Edouard…	Lefran?ois, L.; Uconn Health Center, Department of Medicine, 263 Farmington Ave, Farmington, Connecticut, 06030, United States								142980			7907296	English	Eur. J. Immunol.	Article	Final		Scopus	2-s2.0-0028179952
PAUS R., HOFMANN U., EICHM?LLER S., CZARNETZKI B.M.	34572423200;7102886113;7004432102;7102107195;	Distribution and changing density of gamma‐delta T cells in murine skin during the induced hair cycle	1994	British Journal of Dermatology	130	3		281	289		73	10.1111/j.1365-2133.1994.tb02922.x	https://www.scopus.com/inward/record.uri?eid=2-s2.0-0028286063&doi=10.1111%2fj.1365-2133.1994.tb02922.x&partnerID=40&md5=7acadeeea5d008d767ac4c642cf9f773	Department of Dermatology, University Hospital R.Virchow, Freie Universit?t Berlin, Berlin, D-13344, Germany	PAUS, R., Department of Dermatology, University Hospital R.Virchow, Freie Universit?t Berlin, Berlin, D-13344, Germany; HOFMANN, U., Department of Dermatology, University Hospital R.Virchow, Freie Universit?t Berlin, Berlin, D-13344, Germany; EICHM?LLER, S., Department of Dermatology, University Hospital R.Virchow, Freie Universit?t Berlin, Berlin, D-13344, Germany; CZARNETZKI, B.M., Department o…	Summary Gamma‐delta T cells (gdTC) are recognized as the predominant intraepidermal T‐cell population in murine skin, although their physiological functions are still unclear. Little is known of the exact distribution of gdTC in the other epithelial skin compartments of normal mice. Using selective gdTC‐receptor antibodies in immunohistology (alkaline phosphatase technique), the distribution and …		t lymphocyte receptor; animal tissue; article; controlled study; female; hair follicle; hair growth; mouse; nonhuman; priority journal; skin; Animal; Female; Hair; Immunohistochemistry; Mice; Mice, Inbred C57BL; Models, Biological; Receptors, Antigen, T-Cell, gamma-delta; Skin; Support, Non-U.S. Gov't; T-Lymphocytes		Receptors, Antigen, T-Cell, gamma-delta			Allison, JP, Havran, WL., The immunobiology of T cells with invariant gamma‐delta antigen receptors (1991) Annu Rev Immunol, 9, pp. 679-705; Bergstresser, PR, Cruz, PD, Takashima, A., Dendritic epidermal T cells: lessons from mice for humans (1993) Journal of Investigative Dermatology, 100, pp. 80S-83S; Tigelaar, RE, Lewis, JM, Nixon‐Fulton, JL, Bergstresser, PR., Thy‐1 antigen‐bearing dendritic …	PAUS, R.; Ukrv, Fu Berlin, Berlin, D-1000, Germany								70963			8148267	English	Br. J. Dermatol.	Article	Final		Scopus	2-s2.0-0028286063
Nasir A., Ferbel B., Salminen W., Barth R.K., Gaspari A.A.	7003695272;6505873724;56462713800;7201654055;7103367505;	Exaggerated and persistent cutaneous delayed-type hypersensitivity in transgenic mice whose epidermal keratinocytes constitutively express B7-1 antigen	1994	Journal of Clinical Investigation	94	2		892	898		42	10.1172/JCI117411	https://www.scopus.com/inward/record.uri?eid=2-s2.0-0028098749&doi=10.1172%2fJCI117411&partnerID=40&md5=17025286a79059376f8535ae1a7fb0ec	Department of Dermatology, Univ. Rochester Sch. Med. and Dent., Rochester, NY 14642, United States; Dept. of Microbiology and Immunology, Univ. Rochester Sch. Med. and Dent., Rochester, NY 14642, United States; Strong Children's Research Center, Univ. Rochester Sch. Med. and Dent., Rochester, NY 14642, United States; Cancer Center, Univ. Rochester Sch. Med. and Dent., Rochester, NY 14642, United …	Nasir, A., Department of Dermatology, Univ. Rochester Sch. Med. and Dent., Rochester, NY 14642, United States; Ferbel, B., Department of Dermatology, Univ. Rochester Sch. Med. and Dent., Rochester, NY 14642, United States; Salminen, W., Dept. of Microbiology and Immunology, Univ. Rochester Sch. Med. and Dent., Rochester, NY 14642, United States; Barth, R.K., Dept. of Microbiology and Immunology, …	Since mouse keratinocytes are tolerogenic antigen presenting cells for T cell activation, the expression of second signal molecules such as B7-1 was targeted to epidermal keratinocytes (KC) in vivo in transgenic mice. The expression vector used to create transgenic mice consisted of a keratin 14 promoter fused 5' to the full length open reading frame of the cDNA encoding mouse B7-1 (between 10 an…	B7-1 antigen; costimulation; keratinocytes; peripheral tolerance; transgenic mice	major histocompatibility antigen class 1; major histocompatibility antigen class 2; T lymphocyte receptor; animal cell; antigen expression; antigen presenting cell; antigen specificity; article; contact allergy; controlled study; delayed hypersensitivity; gene expression regulation; immunohistochemistry; immunological tolerance; immunostimulation; keratinocyte; mouse; nonhuman; priority journal; …					Gaspari, A.A., Katz, S.I., Induction and functional characterization of class II MHC (Ia) antigens on murine keratinocytes (1988) J. Immunol., 140, pp. 2956-2963; Gaspari, A.A., Jenkins, M.K., Katz, S.I., Class II MHC-bearing keratinocytes induce antigen-specific unresponsiveness in hapten-specific clones (1988) J. Immunol., 141, pp. 2216-2220; Bal, V., McIndoe, A., Denton, G., Hudson, D., Lombar…	Gaspari, A.A.; Dermatology Department, URSMD, Box 697, 601 Elmwood Ave., Rochester, NY 14642, United States			American Society for Clinical Investigation					219738		JCINA	7518845	English	J. CLIN. INVEST.	Article	Final	Open Access	Scopus	2-s2.0-0028098749
Kuhnlein P., Park J.-H., Herrmann T., Elbe A., Hunig T.	6603288388;35243143100;7102926038;7003877845;7006096938;	Identification and characterization of rat γ/δ T lymphocytes in peripheral lymphoid organs, small intestine, and skin with a monoclonal antibody to a constant determinant of the γ/δ T cell receptor	1994	Journal of Immunology	153	3		979	986		88		https://www.scopus.com/inward/record.uri?eid=2-s2.0-0028306274&partnerID=40&md5=7f717f5817054492fc7edbb0a4d0e46a	Institute of Virology/Immunobiology, University of Wurzburg, Versbacherstrasse 7, D-97078 Wurzburg, Germany	Kuhnlein, P., Institute of Virology/Immunobiology, University of Wurzburg, Versbacherstrasse 7, D-97078 Wurzburg, Germany; Park, J.-H., Institute of Virology/Immunobiology, University of Wurzburg, Versbacherstrasse 7, D-97078 Wurzburg, Germany; Herrmann, T., Institute of Virology/Immunobiology, University of Wurzburg, Versbacherstrasse 7, D-97078 Wurzburg, Germany; Elbe, A., Institute of Virology…	A mAb called V65 was raised to a CD3+, TCR-α/β- rat/mouse T cell hybrid that selectively reacts with all CD3+, TCR-α/β rat lymphocytes. Both anti-CD3 and V65 precipitate a 48- to 50-kDa heterodimeric protein from digitonin-lysed surface-iodinated cells. V65+ but not V65- T cells and T cell hybridoma cells express TCR-γ mRNA. Together, these results show that V65 detects a constant determinant of …		cd2 antigen; cd3 antigen; cd4 antigen; cd5 antigen; cd8 antigen; messenger rna; monoclonal antibody; t lymphocyte receptor; animal cell; antigen detection; antigen expression; article; controlled study; dendritic cell; female; lymphocyte proliferation; major histocompatibility complex restriction; male; nonhuman; phenotype; priority journal; rat; t lymphocyte subpopulation; thymus; Animal; Antibo…		Antibodies, Monoclonal; Antigens, Differentiation, T-Lymphocyte; Receptors, Antigen, T-Cell, gamma-delta; RNA, Messenger				Hunig, T.; Institute of Virology/Immunobiology, University of Wurzburg, Versbacherstrasse 7, D-97078 Wurzburg, Germany								221767		JOIMA	8027567	English	J. IMMUNOL.	Article	Final		Scopus	2-s2.0-0028306274
Hashizume H., Tokura Y., Takigawa M.	7102076844;7201408499;55528625000;	Increased number of dendritic epidermal T cells associated with induced anagen phase of hair cycles	1994	Journal of Dermatological Science	8	2		119	124		7	10.1016/0923-1811(94)90005-1	https://www.scopus.com/inward/record.uri?eid=2-s2.0-0028109351&doi=10.1016%2f0923-1811%2894%2990005-1&partnerID=40&md5=743be69cc17546e705d4b8a1451684d2	Division of Dermatology, National Tousei Hospital, 762-I, Nagasawa, Shimizu-cho, Suntou-gun, Shizuoka, 411, Japan; Department of Dermatology, Hamamatsu University School of Medicine, Hamamatsu, Japan	Hashizume, H., Division of Dermatology, National Tousei Hospital, 762-I, Nagasawa, Shimizu-cho, Suntou-gun, Shizuoka, 411, Japan; Tokura, Y., Department of Dermatology, Hamamatsu University School of Medicine, Hamamatsu, Japan; Takigawa, M., Department of Dermatology, Hamamatsu University School of Medicine, Hamamatsu, Japan	With the use of immunofluorescent staining we investigated the number and the morphologic and phenotypic changes of murine dendritic epidermal T cells (DETC) at various phases of the hair cycle that were synchronized by depilation. The epidermis on day 1 after depilation contained a small number of DETC, round DETC populated at perifollicular space on day 7, and then a large number of DETC with c…	Dendritic epidermal T cell; Depilation; hair cycles	animal tissue; article; cell proliferation; controlled study; dendritic cell; hair follicle; male; mouse; nonhuman; priority journal; t lymphocyte; Aging; Animal; Comparative Study; Dendritic Cells; Epidermis; Hair; Hair Removal; Lymphocyte Count; Male; Mice; Mice, Inbred C57BL; Phenotype; T-Lymphocytes					Bergstresser, Sullivan, Streilein, Tigelaar, Origin and function of Thy-1+ dendritic epidermal cells in mice (1985) Journal of Investigative Dermatology, 85, pp. 85s-90s; Bergstresser, Tigelaar, Dees, Streilein, Thy-1 antigen-bearing dendritic cells populate murine epidermis (1983) J Invest Dermatol, 81, pp. 286-288; SW, Breathnach, Sharrow, Stephany, Katz, Culture and characterization of murine …	Hashizume, H.; Division of Dermatology, National Tousei Hospital, 762-I, Nagasawa, Shimizu-cho, Suntou-gun, Shizuoka, 411, Japan								9231811		JDSCE	7841154	English	J. Dermatol. Sci.	Article	Final		Scopus	2-s2.0-0028109351
Love-Schimenti C.D., Kripke M.L.	6507284026;7101915890;	Inhibitory effect of a dendritic epidermal T cell line on K1735 melanoma cells in vivo and in vitro	1994	Journal of Leukocyte Biology	55	3		379	384		9	10.1002/jlb.55.3.379	https://www.scopus.com/inward/record.uri?eid=2-s2.0-0028224025&doi=10.1002%2fjlb.55.3.379&partnerID=40&md5=4ce02f385ce15b480fcc445b99088038	Department of Immunology, Texas Univ. M.D. Anderson Can. Ctr., Box 178, 1515 Holcombe Blvd., Houston, TX 77030, United States	Love-Schimenti, C.D., Department of Immunology, Texas Univ. M.D. Anderson Can. Ctr., Box 178, 1515 Holcombe Blvd., Houston, TX 77030, United States; Kripke, M.L., Department of Immunology, Texas Univ. M.D. Anderson Can. Ctr., Box 178, 1515 Holcombe Blvd., Houston, TX 77030, United States	Murine epidermis contains a resident population of dendritic epidermal T cells (DETCs) with unknown function. We tested the ability of a cultured line of these cells to inhibit the growth of murine melanoma cells in vitro and in vivo. The interleukin-2 (IL-2)-dependent T cell line AU16, derived from the epidermis of C3H mice, was used as the source of DETCs. AU16 cells were cytotoxic to syngeneic…	cutaneous immunity; cytotoxicity; skin cancer	interleukin 2; animal cell; animal experiment; article; cell line; controlled study; dendritic cell; epidermis cell; female; growth inhibition; melanoma cell; mouse; nonhuman; priority journal; T lymphocyte; Animalia; Murinae		interleukin 2, 85898-30-2		Shionogi, Japan		Kripke, M.L.; Department of Immunology, Texas Univ. M.D. Anderson Can. Ctr., Box 178, 1515 Holcombe Blvd., Houston, TX 77030, United States			Federation of American Societies for Experimental Biology					7415400		JLBIE	7907126	English	J. LEUKOCYTE BIOL.	Article	Final		Scopus	2-s2.0-0028224025
Williams I.R., Ort R.J., Kupper T.S.	7201818731;56360894600;7004395018;	Keratinocyte expression of B7-1 in transgenic mice amplifies the primary immune response to cutaneous antigens	1994	Proceedings of the National Academy of Sciences of the United States of America	91	26		12780	12784		50	10.1073/pnas.91.26.12780	https://www.scopus.com/inward/record.uri?eid=2-s2.0-0028556917&doi=10.1073%2fpnas.91.26.12780&partnerID=40&md5=0a94caccea04cb14db5054ae16620ad5	Harvard Skin Dis. Research Center, Brigham and Women's Hospital, Harvard Medical School, 75 Francis Street, Boston, MA 02115, United States	Williams, I.R., Harvard Skin Dis. Research Center, Brigham and Women's Hospital, Harvard Medical School, 75 Francis Street, Boston, MA 02115, United States; Ort, R.J., Harvard Skin Dis. Research Center, Brigham and Women's Hospital, Harvard Medical School, 75 Francis Street, Boston, MA 02115, United States; Kupper, T.S., Harvard Skin Dis. Research Center, Brigham and Women's Hospital, Harvard Med…	Resting epidermal keratinocytes do not express B7-1 and other known CD28 counterligands with costimulatory activity. The absence of these costimulators on keratinocytes correlates with their ability to preferentially induce T-cell anergy instead of T-cell activation. To test the hypothesis that keratinocytes expressing a CD28 counterligand would be more effective inducers of T-cell-mediated immun…		antigen; animal cell; antigen expression; antigen presentation; article; contact allergy; flow cytometry; gene amplification; host resistance; immune response; keratinocyte; langerhans cell; ligand binding; mouse; nonhuman; priority journal; t lymphocyte activation; transgenic mouse; Animal; Antigen-Presenting Cells; Antigens, CD80; Dermatitis, Contact; Histocompatibility Antigens Class II; Immun…		Antigens, CD80; Histocompatibility Antigens Class II				Kupper, T.S.; Division of Dermatology, Harvard Skin Diseases Research Ctr., Brigham and Women's Hospital, 75 Francis Street, Boston, MA 02115, United States								278424		PNASA	7528926	English	PROC. NATL. ACAD. SCI. U. S. A.	Article	Final	Open Access	Scopus	2-s2.0-0028556917
Niwa J.-I., Kobayashi M., Kotani H., Hoshino T.	57198193320;7405537559;7101691073;15757607900;	Langerhans Cells Closely Associated with Thy-l-Positive Dendritic Cells in the Stratified Squamous Mucosal Epithelium of Mice	1994	Archives of Histology and Cytology	57	3		259	266		11	10.1679/aohc.57.259	https://www.scopus.com/inward/record.uri?eid=2-s2.0-0027979082&doi=10.1679%2faohc.57.259&partnerID=40&md5=0b3494864c1d756e1f0405287d03f7e7	Departments of Anatomy, Japan; Nippi Research Institute of Biomatrix, Tokyo, Japan; Departments of Oral Surgery, Nagoya University School of Medicine, Nagoya, Japan	Niwa, J.-I., Departments of Anatomy, Japan, Nippi Research Institute of Biomatrix, Tokyo, Japan, Departments of Oral Surgery, Nagoya University School of Medicine, Nagoya, Japan; Kobayashi, M., Departments of Anatomy, Japan; Kotani, H., Departments of Anatomy, Japan; Hoshino, T., Departments of Anatomy, Japan	An immunohistochemical study was carried out on two types of dendritic immune cells, Langerhans cells and Thy-l-positive cells, in the epithelium of the forestomach of 1-, 2-, 3-, 4-and 8-week-old mice. Investigation focused on how both types of cells were distributed and might interact in the mucosal epithelium. Langerhans cells and Thy-1-positive dendritic cells appeared in mucosal epithelium a…		thy 1 antigen; animal tissue; article; dendritic cell; esophagus mucosa; immunohistochemistry; langerhans cell; mouse; nonhuman; skin; squamous epithelium; stomach mucosa; ultrastructure; Animal; Antigens, Thy-1; Cell Communication; Dendritic Cells; Epithelial Cells; Epithelium; Female; Gastric Mucosa; Immunohistochemistry; Langerhans Cells; Mice; Mice, Inbred Strains; Microscopy, Electron		Antigens, Thy-1			Haregewoin, A., Soman, G., Hom, R.C., Finberg, R.W., Human γδ+ O cells respond to mycobacterial heat-shock protein. (1989) Nature, 340, pp. 309-312; Hsu, S.M., Soban, E., Color modification of diamino-benzidine (DAB) precipitation by metallic irons and its application for double immuno-histochemistry. (1982) J. Histo-chem. Cytochem., 30, pp. 1079-1082; Itohara, S., Farr, A.G., Lafaille, J.J., Bon…									9149465			7818949	English	Arch. Histol. Cytol.	Article	Final	Open Access	Scopus	2-s2.0-0027979082
Tamaki K., Saitoh A., Gaspari A.A., Yasaka N., Furue M.	35390850700;7103141102;7103367505;6603041065;7102712402;	Migration of Thy-1+ dendritic epidermal cells (Thy-1+DEC): Ly48 and TNF-α are responsible for the migration of Thy-1+DEC to the epidermis	1994	Journal of Investigative Dermatology	103	3		290	294		10	10.1111/1523-1747.ep12394437	https://www.scopus.com/inward/record.uri?eid=2-s2.0-0028081565&doi=10.1111%2f1523-1747.ep12394437&partnerID=40&md5=09758fd4da00a3d407ad86993d6df822	Department of Dermatology, Yamanashi Medical University, Yamanashi, Japan; Division of Dermatology, University of Rochester, Rochester, NY, United States	Tamaki, K., Department of Dermatology, Yamanashi Medical University, Yamanashi, Japan; Saitoh, A., Department of Dermatology, Yamanashi Medical University, Yamanashi, Japan; Gaspari, A.A., Department of Dermatology, Yamanashi Medical University, Yamanashi, Japan, Division of Dermatology, University of Rochester, Rochester, NY, United States; Yasaka, N., Department of Dermatology, Yamanashi Medica…	Thy-1+ dendritic epidermal cells (Thy-1+DEC) are mainly T cells that express T-cell receptor γ and δ chains with limited diversity of γδ, mainly γ3δ1; such γ3δ1 TCR-bearing Thy-1+DEC originate from day 16 fetal thymic cells. To understand the migratory capability of Thy-1+DEC, we developed an in vitro model, using skin organ culture. First, emigration of Thy1+DEC from the epidermis was examined. …		clobetasol propionate; leukosialin; monoclonal antibody; t lymphocyte receptor; tumor necrosis factor alpha; tumor necrosis factor alpha antibody; tumor necrosis factor antibody; animal experiment; animal model; animal tissue; article; cell migration; controlled study; epidermis; mouse; nonhuman; priority journal; topical drug administration; Animal; Antigens, Surface; Antigens, Thy-1; Cell Movem…		clobetasol propionate, 25122-46-7; leukosialin, 123897-54-1; tumor necrosis factor antibody, 162774-06-3; Antigens, Surface; Antigens, Thy-1; clobetasol propionate, 25122-46-7; Clobetasol, 25122-41-2; Epitopes; Fluorescent Dyes; Membrane Glycoproteins; PKH 26; Sialoglycoproteins; sialophorin; Tumor Necrosis Factor		glaxo, United Kingdom		Tamaki, K.; Department of Dermatology, Yamanashi Medical University, Yamanashi, Japan								0022202X		JIDEA	7521373	English	J. Invest. Dermatol.	Article	Final	Open Access	Scopus	2-s2.0-0028081565
Cumberbatch M., Fielding I., Kimber I.	7004800568;6602121822;25026048300;	Modulation of epidermal Langerhans' cell frequency by tumour necrosis factor-α	1994	Immunology	81	3		395	401		125		https://www.scopus.com/inward/record.uri?eid=2-s2.0-0027993852&partnerID=40&md5=e6091946d96b64951e8374c61c928282	Zeneca Central Toxicology Laboratory, Alderley Park, Macclesfield, Cheshire SK10 4TJ, United Kingdom	Cumberbatch, M., Zeneca Central Toxicology Laboratory, Alderley Park, Macclesfield, Cheshire SK10 4TJ, United Kingdom; Fielding, I., Zeneca Central Toxicology Laboratory, Alderley Park, Macclesfield, Cheshire SK10 4TJ, United Kingdom; Kimber, I., Zeneca Central Toxicology Laboratory, Alderley Park, Macclesfield, Cheshire SK10 4TJ, United Kingdom	During the induction phase of skin sensitization, dendritic cells (DC), many of which bear high levels of antigen, accumulate in lymph nodes draining the site of exposure. These DC derive from epidermal Langerhans' cells (LC) which are induced to migrate from the skin, via the afferent lymphatics, to lymph nodes. We demonstrated previously that intradermal exposure of mice to homologous, but not …		granulocyte macrophage colony stimulating factor; thy antigen; tumor necrosis factor alpha; animal cell; animal tissue; article; cell migration; dendritic cell; epidermis; intradermal drug administration; langerhans cell; lymph node; mouse; nonhuman; Animal; Antigens, Surface; Antigens, Thy-1; Dendritic Cells; Epidermis; Histocompatibility Antigens Class II; Human; Kinetics; Langerhans Cells; Mem…		Antigens, Surface; Antigens, Thy-1; Histocompatibility Antigens Class II; Membrane Glycoproteins; Recombinant Proteins; Tumor Necrosis Factor		zeneca, United Kingdom		Cumberbatch, M.; Zeneca Central Toxicology Laboratory, Alderley Park, Macclesfield, Cheshire SK10 4TJ, United Kingdom								192805		IMMUA	7911448	English	IMMUNOLOGY	Article	Final		Scopus	2-s2.0-0027993852
Boismenu R., Havran W.L.	6701836456;7004541279;	Modulation of epithelial cell growth by intraepithelial γδT cells	1994	Science	266	5188		1253	1255		530	10.1126/science.7973709	https://www.scopus.com/inward/record.uri?eid=2-s2.0-0028117098&doi=10.1126%2fscience.7973709&partnerID=40&md5=69ea337c33241f414dc8f7fadb078ab0	Department of Immunology, Scripps Research Institute, San Diego, CA 92037, United States	Boismenu, R., Department of Immunology, Scripps Research Institute, San Diego, CA 92037, United States; Havran, W.L., Department of Immunology, Scripps Research Institute, San Diego, CA 92037, United States	The role played in immune surveillance by γδ T cells residing in various epithelia has not been clear. It is shown here that activated γδ T cells obtained from skin and intestine express the epithelial cell mitogen keratinocyte growth factor (KGF). In contrast, intraepithelial αβ T cells, as well as all lymphoid αβ and γδ T cell populations tested, did not produce KGF or promote the growth of cul…		keratinocyte growth factor; mitogenic agent; animal cell; article; cell culture; cell growth; controlled study; epithelium cell; immunosurveillance; intestine; lymphocyte activation; mouse; nonhuman; priority journal; skin; t lymphocyte; Animal; Base Sequence; Cell Division; Cell Line; Cells, Cultured; Cloning, Molecular; Dendritic Cells; Epithelial Cells; Growth Substances; Keratinocytes; Lympho…	GENBANK: Z22703	fibroblast growth factor 10; Growth Substances; keratinocyte growth factor, 126469-10-1; Receptors, Antigen, T-Cell, gamma-delta			Wahle, E., Keller, W., (1992) Annu. Rev. Biochem., 61, p. 419; Butler, J.S., Platt, T., (1988) Science, 242, p. 1270; Patel, D., Butler, J.S., (1992) Mol. Cell. Biol., 12, p. 3297; Butler, J.S., Sadhale, P.P., Platt, T., (1990) Mol. Cell. Biol., 10, p. 2599; Moore, C.L., Sharp, P.A., (1984) Cell, 36, p. 581; Chen, J., Moore, C., (1992) Mol. Cell. Biol., 12, p. 3470; Lingner, J., Radtke, I., Wahle…	Havran, W.L.; Department of Immunology, Scripps Research Institute, San Diego, CA 92037, United States								368075			7973709	English		Article	Final		Scopus	2-s2.0-0028117098
Lee M.-G., Tang A., Sharrow S.O., Udey M.C.	35422302500;7201845908;7006830105;7006032452;	Murine dendritic epidermal T cells (DETC) express the hemophilic adhesion molecule E-cadherin	1994	Epithelial Cell Biology	3	4		149	155		11		https://www.scopus.com/inward/record.uri?eid=2-s2.0-0028674486&partnerID=40&md5=cc90fd427aa36ddc806bb9118c486764	Dermatology Branch, National Cancer Institute, National Institutes of Health, Bethesda, MD 20892, United States	Lee, M.-G., Dermatology Branch, National Cancer Institute, National Institutes of Health, Bethesda, MD 20892, United States; Tang, A., Dermatology Branch, National Cancer Institute, National Institutes of Health, Bethesda, MD 20892, United States; Sharrow, S.O., Dermatology Branch, National Cancer Institute, National Institutes of Health, Bethesda, MD 20892, United States; Udey, M.C., Dermatology…	Cadherins mediate homotypic intercellular adhesion in epidermis and other epithelia. E-cadherin is also involved in interactions between murine epidermal Langerhans cells (LC) and keratinocytes (KC). Dendritic epidermal T cells (DETC) comprise another subpopulation of epidermal leukocytes. Using flow cytometry, we determined that DETC expressed levels of E-cadherin similar to those expressed by L…	Adhesion; Cadherin; Dendritic epidermal T cells (DETC); Epidermis; Leukocytes; Thymocytes	calcium ion; cell adhesion molecule; membrane antigen; t lymphocyte antigen; t lymphocyte receptor; trypsin; uvomorulin; animal cell; antigen expression; article; cell adhesion; controlled study; dendritic cell; embryo; epidermis cell; female; fibroblast; flow cytometry; keratinocyte; langerhans cell; mouse; newborn; nonhuman; priority journal; t lymphocyte; thymocyte; Animal; Antibodies, Monoclo…		calcium ion, 14127-61-8; trypsin, 9002-07-7; uvomorulin, 112956-45-3; Antibodies, Monoclonal; Cadherins; Calcium, 7440-70-2; Chelating Agents; Edetic Acid, 60-00-4; Trypsin, EC 3.4.21.4				Udey, M.C.; Dermatology Branch, National Cancer Institute, National Institutes of Health, Bethesda, MD 20892, United States								9409912		ECBIE	7550606	English	EPITHELIAL CELL BIOL.	Article	Final		Scopus	2-s2.0-0028674486
Ohno H., Ono S., Hirayama N., Shimada S., Saito T.	7403244772;7401441024;7102432471;7402762452;55689789100;	Preferential usage of the Fc receptor γ chain in the T cell antigen receptor complex by γ/δ T cells localized in epithelia	1994	Journal of Experimental Medicine	179	1		365	369		61	10.1084/jem.179.1.365	https://www.scopus.com/inward/record.uri?eid=2-s2.0-0028107255&doi=10.1084%2fjem.179.1.365&partnerID=40&md5=02710e7fd895b3533517d7601a9f35f4	Division of Molecular Genetics, Center for Biomedical Science, Chiba University School of Medicine, Chiba, 260, Japan; Department of Immunology, National Institute of Health, Tokyo, 162, Japan; Department of Dermatology, Tokyo University Branch Hospital, Tokyo, 112, Japan	Ohno, H., Division of Molecular Genetics, Center for Biomedical Science, Chiba University School of Medicine, Chiba, 260, Japan; Ono, S., Division of Molecular Genetics, Center for Biomedical Science, Chiba University School of Medicine, Chiba, 260, Japan; Hirayama, N., Department of Immunology, National Institute of Health, Tokyo, 162, Japan; Shimada, S., Department of Dermatology, Tokyo Univers…	ζ and η chains of the T cell antigen receptor (TCR) complex and the γ chain of Fc receptors (FcRγ) constitute a family of proteins important for the expression of, and signal transduction through, these receptors in hematopoietic cells. In ζ-deficient mice, TCR expression was reduced in most T cells. By contrast, CD8αα+ TCR-γ/δ+ intestinal intraepithelial lymphocytes in these mice expressed a nor…		Fc receptor; immunoglobulin fc fragment; t lymphocyte antigen; t lymphocyte receptor; animal cell; antigen recognition; article; controlled study; epithelium cell; female; mouse; nonhuman; priority journal; signal transduction; Animal; Cells, Cultured; Epithelium; Female; Flow Cytometry; Hybridomas; Mice; Mice, Inbred BALB C; Mice, Inbred Strains; Precipitin Tests; Receptors, Antigen, T-Cell, gam…		Receptors, Antigen, T-Cell, gamma-delta; Receptors, Fc			Saito, T., Weiss, A., Miller, J., Norcross, M.A., Germain, R.N., Specific antigen-Ia activation of transfected human T cells expressing murine T1 α/β-human receptor complexes (1987) Nature (Lotid.)., 325, p. 125; Davis, M.M., Bjorkman, P.J., T-cell antigen receptor genes and T-cell recognition (1988) Nature (Lond.)., 334, p. 395; Klausner, R.D., Lippincott-Schwartz, J., Bonifacino, J.S., The T ce…	Saito, T.; Division of Molecular Genetics, Center for Biomedical Science, Chiba University School of Medicine, 1-8-1 Inohana, Chuo-Ku, Chiba, 260, Japan								221007			8270881	English	J. Exp. Med.	Article	Final	Open Access	Scopus	2-s2.0-0028107255
Strickland F.M., Pelley R.P., Kripke M.L.	7004013163;7004293636;7101915890;	Prevention of ultraviolet radiation-induced suppression of contact and delayed hypersensitivity by Aloe barbadensis gel extract	1994	Journal of Investigative Dermatology	102	2		197	204		71	10.1111/1523-1747.ep12371762	https://www.scopus.com/inward/record.uri?eid=2-s2.0-0028105788&doi=10.1111%2f1523-1747.ep12371762&partnerID=40&md5=6a32a9bfbff054a991ba06bde4574be1	Department of Immunology, The University of Texas M.D. Anderson Cancer Center, Houston, TX, United States; Department of Pharmacology and Toxicology, The University of Texas Medical Branch, Galveston, TX, United States	Strickland, F.M., Department of Immunology, The University of Texas M.D. Anderson Cancer Center, Houston, TX, United States; Pelley, R.P., Department of Pharmacology and Toxicology, The University of Texas Medical Branch, Galveston, TX, United States; Kripke, M.L., Department of Immunology, The University of Texas M.D. Anderson Cancer Center, Houston, TX, United States	We investigated the ability of Aloe barbadensis gel extract to prevent suppression of contact hypersensitivity (CHS) and delayed-type hypersensitivity (DTH) responses in mice by ultraviolet (UV) irradiation. Local immune suppression was induced in C3H mice by exposure to four daily doses of 400 J/m2 UV-B (280-320 nm) radiation from FS40 sunlamps, followed by sensitization with 0.5% fluorescein is…	Candida albicans; hapten; photo protection; UV-B	aloe barbadensis extract; emodin; plant extract; animal experiment; animal model; animal tissue; article; candida albicans; controlled study; delayed hypersensitivity; female; infection; mouse; nonhuman; priority journal; topical drug administration; ultraviolet b radiation; Adenosinetriphosphatase; Administration, Topical; Aloe; Animal; Antigens, Surface; Antigens, Thy-1; Candida albicans; Compa…		emodin, 518-82-1, 57828-45-2; Adenosinetriphosphatase, EC 3.6.1.3; Antigens, Surface; Antigens, Thy-1; DNA, 9007-49-2; Fluorescein-5-isothiocyanate, 3326-32-7; Gels; Histocompatibility Antigens Class II; Membrane Glycoproteins; Plant Extracts; Sunscreening Agents				Strickland, F.M.; Department of Immunology, The University of Texas M.D. Anderson Cancer Center, Houston, TX, United States								0022202X		JIDEA	7906286	English	J. Invest. Dermatol.	Article	Final	Open Access	Scopus	2-s2.0-0028105788
Rimm I.J., Fruman D.A., Abhyankar S., Sakamoto H., Orme I.M., Milstone D., Seidman J.G., Ferrara J.L.M.	7003409451;7007115331;7005100202;7401665729;7004710075;6701472851;7101816720;7102663683;	T cell receptor (β chain) transgenic mice have selective deficits in γδ T cell subpopulations	1994	Transplant Immunology	2	3		218	224		3	10.1016/0966-3274(94)90063-9	https://www.scopus.com/inward/record.uri?eid=2-s2.0-0027941232&doi=10.1016%2f0966-3274%2894%2990063-9&partnerID=40&md5=8c5d3cc6836eb2394a42395dbb23f0db	Division of Pediatric Hematology/Oncology, Dana-Farber Cancer Institute and The Children's Hospital, and Department of Pediatrics, The Harvard Medical School, Boston, USA, United States; Department of Microbiology, University of Colorado, Fort Collins, CO, United States; Vascular Research Division, Department of Pathology, Brigham and Women's Hospital, Boston, United States; Department of Genetic…	Rimm, I.J., Division of Pediatric Hematology/Oncology, Dana-Farber Cancer Institute and The Children's Hospital, and Department of Pediatrics, The Harvard Medical School, Boston, USA, United States; Fruman, D.A., Division of Pediatric Hematology/Oncology, Dana-Farber Cancer Institute and The Children's Hospital, and Department of Pediatrics, The Harvard Medical School, Boston, USA, United States;…	TCR-β (T cell receptor-β-chain) transgenic mice have altered lymphocyte development. TCR-β transgenic mice are hyporesponsive to alloantigens in vivo and are deficient in γδ T cells. In order to begin a study of the relationship between a deficiency of alloreactive γδ cells and the defective function of in vivo alloantigen recognition, we analysed the γδ T cell development in TCR-β mice. The pres…		rna; t lymphocyte receptor; animal experiment; article; dendritic cell; development; fetus; gene rearrangement; kinetics; mouse; nonhuman; priority journal; t lymphocyte subpopulation; thymus; transgenic mouse; Animal; Base Sequence; Blotting, Northern; Dendritic Cells; Epidermis; Flow Cytometry; Intestinal Mucosa; Mice; Mice, Transgenic; Molecular Sequence Data; Polymerase Chain Reaction; Recept…		RNA, 63231-63-0; Receptors, Antigen, T-Cell, alpha-beta; Receptors, Antigen, T-Cell, gamma-delta			Havran, Allison, Origin of Thy-1 + dendritic epidermal cells of adult mice from fetal thymic precursors (1990) Nature, 344, pp. 68-70; Stingl, Koning, Yamada, Thy-1 + dendritic epidermal cells express T3 antigen and the T-cell receptor γ chain (1987) Proc Natl Acad Sci USA, 84, pp. 4586-4590. , fourth edition; Allison, Havran, The immunobiology of T cells with invariant γδ antigen receptors (1991…	Rimm, I.J.								9663274		TRIME	8000850	English	Transplant Immunol.	Article	Final		Scopus	2-s2.0-0027941232
Elbe A., Kilgus O., Hünig T., Stingl G.	7003877845;6603415962;7006096938;7102655442;	T-cell receptor diversity in dendritic epidermal T cells in the rat	1994	Journal of Investigative Dermatology	102	1		74	79		8	10.1111/1523-1747.ep12371735	https://www.scopus.com/inward/record.uri?eid=2-s2.0-0028157041&doi=10.1111%2f1523-1747.ep12371735&partnerID=40&md5=725cf78cf9040c9511e881e9eb349413	Division of Immunology, Allergy and Infectious Diseases, Department of Dermatology, University of Vienna Medical School, Vienna, Austria; Institute of Virology and Immunobiology, University of Würzburg, Würzburg, Germany	Elbe, A., Division of Immunology, Allergy and Infectious Diseases, Department of Dermatology, University of Vienna Medical School, Vienna, Austria; Kilgus, O., Division of Immunology, Allergy and Infectious Diseases, Department of Dermatology, University of Vienna Medical School, Vienna, Austria; Hünig, T., Institute of Virology and Immunobiology, University of Würzburg, Würzburg, Germany; Stingl…	The rat epidermis contains a population of dendritic CD3+ cells. For a better characterization of these cells and to investigate their relationship to epidermal lymphocytes of other species, we stained rat epidermal sheets using a variety of monoclonal antibodies against rat leukocyte differentiation antigens in an indirect immunofluorescence procedure. Additionally, we attempted to define their …		CD2 antigen; CD3 antigen; CD45 antigen; CD5 antigen; CD8 antigen; T lymphocyte receptor; article; cell differentiation; controlled study; dendritic cell; development; epidermis; molecular biology; nonhuman; priority journal; rat						Elbe, A.; Division of Immunology, Allergy and Infectious Diseases, Department of Dermatology, University of Vienna Medical School, Vienna, Austria								0022202X		JIDEA	7904617	English	J. Invest. Dermatol.	Article	Final	Open Access	Scopus	2-s2.0-0028157041
Schuhmachers G., Ariizumi K., Mathew P.A., Bennett M., Kumar V., Takashima A.	7801437236;7004712715;7103227741;7403467973;7404634888;7103299656;	2B4, a new member of the immunoglobulin gene superfamily, is expressed on murine dendritic epidermal T cells and plays a functional role in their killing of skin tumors	1995	Journal of Investigative Dermatology	105	4		592	596		50	10.1111/1523-1747.ep12323533	https://www.scopus.com/inward/record.uri?eid=2-s2.0-0028827376&doi=10.1111%2f1523-1747.ep12323533&partnerID=40&md5=d314bbdf783e37f6242be099e4856585	Department of Dermatology, University of Texas, Southwestern Medical Center, 5323 Harry Hines Boulevard, Dallas, TX 75235, United States	Schuhmachers, G., Department of Dermatology, University of Texas, Southwestern Medical Center, 5323 Harry Hines Boulevard, Dallas, TX 75235, United States; Ariizumi, K., Department of Dermatology, University of Texas, Southwestern Medical Center, 5323 Harry Hines Boulevard, Dallas, TX 75235, United States; Mathew, P.A., Department of Dermatology, University of Texas, Southwestern Medical Center, …	Dendritic epidermal T cells (DETC), which are skin-specific members of the tissue-resident γδ T-cell family, are characterized by their potential to kill selected tumor targets by a non-major histocompatibility complex (MHC)-restricted mechanism. We have recently identified a new receptor molecule, 2B4, that appears to be associated with non-MHC-restricted recognition of tumor targets by natural …		cytokine; gamma interferon; granulocyte macrophage colony stimulating factor; interleukin 1; interleukin 10; interleukin 12; interleukin 1alpha; interleukin 4; interleukin 6; interleukin 7; interleukin 8; transforming growth factor beta1; animal cell; article; cancer control; controlled study; cytology; female; gene expression; molecular biology; mouse; nonhuman; priority journal; T lymphocyte		gamma interferon, 82115-62-6; interleukin 12, 138415-13-1; interleukin 8, 114308-91-7		Genzyme, United States; Gibco, United States; R and D Systems, United States		Takashima, A.; Department of Dermatology, University of Texas, Southwestern Medical Center, 5323 Harry Hines Boulevard, Dallas, TX 75235, United States			Nature Publishing Group					0022202X		JIDEA	7561164	English	J. INVEST. DERMATOL.	Article	Final	Open Access	Scopus	2-s2.0-0028827376
Huber H., Descossy P., Van Brandwijk R., Knop J.	56813404800;7801586582;6506291197;7102776088;	Activation of murine epidermal TCR-γδ+ T cells by keratinocytes treated with contact sensitizers	1995	Journal of Immunology	155	6		2888	2894		41		https://www.scopus.com/inward/record.uri?eid=2-s2.0-0029049421&partnerID=40&md5=443d58198649b5056f44ee2ffc0f1ade	Klinische Forschergruppe Allergie, Hautklinik Johannes Gutenberg-Univ., 551 31 Mainz, Germany	Huber, H., Klinische Forschergruppe Allergie, Hautklinik Johannes Gutenberg-Univ., 551 31 Mainz, Germany; Descossy, P., Klinische Forschergruppe Allergie, Hautklinik Johannes Gutenberg-Univ., 551 31 Mainz, Germany; Van Brandwijk, R., Klinische Forschergruppe Allergie, Hautklinik Johannes Gutenberg-Univ., 551 31 Mainz, Germany; Knop, J., Klinische Forschergruppe Allergie, Hautklinik Johannes Guten…	The vast majority of TCR γδ+, CD4+, CD8- T cells resident in the adult mouse epidermis expresses tissue specific V-region genes (Vγ3/Vδ1) in the absence of junctional diversity. The role this unique T cell population plays in the immune surveillance of the skill is not clear. It has been shown that dendritic epidermal T cells (DETC) were activated by stressed keratinocytes and that stimulated DET…		1 fluoro 2,4 dinitrobenzene; cd4 antigen; cd8 antigen; diphencyprone; growth factor; kathon cg; nickel sulfate; oxazolone; picryl chloride; potassium chromate; t lymphocyte receptor; animal cell; article; cell contact; contact allergy; controlled study; epidermis cell; gene; keratinocyte; lymphocyte proliferation; mouse; nonhuman; priority journal; sensitization; t lymphocyte; t lymphocyte activa…		1 fluoro 2,4 dinitrobenzene, 25376-51-6, 70-34-8; diphencyprone, 886-38-4; kathon cg, 55965-84-9; nickel sulfate, 7786-81-4; picryl chloride, 88-88-0; potassium chromate, 7789-00-6; Benzoates; Benzoic Acid, 65-85-0; Dinitrofluorobenzene, 70-34-8; Picryl Chloride, 88-88-0; Receptors, Antigen, T-Cell, gamma-delta				Huber, H.; Klinische Forschergruppe Allergie, Hautklinik Johannes Gutenberg-Univ., 551 31 Mainz, Germany								221767		JOIMA	7673705	English	J. IMMUNOL.	Article	Final		Scopus	2-s2.0-0029049421
Schuhmachers G., Ariizumi K., Mathew P.A., Bennett M., Kumar Y., Takashima A.	7801437236;7004712715;7103227741;55628524672;57191389762;7103299656;	Activation of murine epidermal γδ T cells through surface 2B4	1995	European Journal of Immunology	25	4		1117	1120		45	10.1002/eji.1830250440	https://www.scopus.com/inward/record.uri?eid=2-s2.0-0028956698&doi=10.1002%2feji.1830250440&partnerID=40&md5=c21143c46c802f42ff6a94d501131f17	Department of Dermatology, University of Texas Southwestern Medical Center, Dallas, United States; Department of Pathology, University of Texas Southwestern Medical Center, Dallas, United States	Schuhmachers, G., Department of Dermatology, University of Texas Southwestern Medical Center, Dallas, United States; Ariizumi, K., Department of Dermatology, University of Texas Southwestern Medical Center, Dallas, United States; Mathew, P.A., Department of Pathology, University of Texas Southwestern Medical Center, Dallas, United States; Bennett, M., Department of Pathology, University of Texas …	Dendritic epidermal T cells (DETC) are γδ T cells that normally reside in murine skin. They express on their surface the 2B4 molecule, a 66‐kDa glycoprotein of the immunoglobulin gene superfamily thought to be associated with anti‐tumor cytotoxicity by natural killer and lymphokine‐activated killer cells. Here, we show that ligation of surface 2B4 transduces cell activation signals in DETC. Treat…	2B4; Dendritic epidermal T cells; Signaling	gamma interferon; interleukin 2; monoclonal antibody; t lymphocyte receptor delta chain; t lymphocyte receptor gamma chain; animal cell; antineoplastic activity; article; cytotoxicity; dendritic cell; epidermis cell; female; immunoglobulin gene; lymphokine activated killer cell; mouse; natural killer cell; nonhuman; priority journal; t lymphocyte activation; Animal; Antibodies, Monoclonal; Antige…		gamma interferon, 82115-62-6; interleukin 2, 85898-30-2; Antibodies, Monoclonal; Antigens, Surface; DNA-Binding Proteins; erg-1 protein; Interferon Type II, 82115-62-6; Interleukin-2; Retroviridae Proteins, Oncogenic			Tigelaar, R.E., Lewis, J.M., Nixon‐Fulton, J.L., Bergstresser, P.R., (1991) Biochemistry and Physiology of the Skin, p. 1164. , Goldsmith, E. A., Oxford University Press, Oxford; Allison, J.P., Havran, W.L., (1991) Annu. Rev. Immunol., 9, p. 679; Bergstresser, P.R., Cruz, P.D., Jr., Takashima, A., (1993) J. Invest. Dermatol., 100, p. 80S; Asarnow, D.M., Kuziel, W.A., Bonyhadi, M., Tigelaar, R.E.,…	Takashima, A.; Department of Dermatology, University of Texas Southwestern Medical Center, 5232 Harry Hines Blvd, Dallas, Texas, 75235, United States								142980			7737283	English	Eur. J. Immunol.	Article	Final		Scopus	2-s2.0-0028956698
Huber H., Descossy P., Regier E., van Brandwijk R., Knop J.	56813404800;7801586582;6505943959;6506291197;7102776088;	Activation of phenotypically heterogeneous murine T cell receptor γδ + dendritic epidermal T cells by self-Antigen(S)	1995	International Archives of Allergy and Immunology	107	4		498	507		4	10.1159/000237092	https://www.scopus.com/inward/record.uri?eid=2-s2.0-0029019330&doi=10.1159%2f000237092&partnerID=40&md5=7aabd5c563388ae56c9d33268bb4fa17	Klinische Forschergruppe Allergie an der, Hautklinik der Johannes-Gutenberg-Universit?t, Mainz, Germany	Huber, H., Klinische Forschergruppe Allergie an der, Hautklinik der Johannes-Gutenberg-Universit?t, Mainz, Germany; Descossy, P., Klinische Forschergruppe Allergie an der, Hautklinik der Johannes-Gutenberg-Universit?t, Mainz, Germany; Regier, E., Klinische Forschergruppe Allergie an der, Hautklinik der Johannes-Gutenberg-Universit?t, Mainz, Germany; van Brandwijk, R., Klinische Forschergruppe All…	Adult murine epidermis contains a population of Thy-1+, CD45+, CD3+, CD4-and CDS- in situ primarily T cell receptor (TCR) Vγ3+/Vδ1+ dendritic epidermal T cells (DETC). In the present study, cell surface phenotypes as well as functional properties of DETC were characterized by using in vitro mitogen-stimulated short-term- (10 days) and cloned long-term-cultured (>1 year) DETC lines. Phenotypic cha…	Cytokine profiles; Dendritic epidermal T cells (DETC); Phcnolypic heterogeneity; Self-reactivity; γδ +T cells	autoantigen; gamma interferon; interleukin 2; interleukin 3; interleukin 4; t lymphocyte receptor delta chain; t lymphocyte receptor gamma chain; animal cell; article; cell surface; dendritic cell; female; lymphocyte clone; lymphocyte culture; lymphocyte proliferation; macrophage; male; mouse; nonhuman; phenotype; priority journal; t lymphocyte; t lymphocyte activation; Animal; Antigens; Cell Lin…		gamma interferon, 82115-62-6; interleukin 2, 85898-30-2; Antigens; Cytokines; Receptors, Antigen, T-Cell, gamma-delta			Tschaehler, E., Schuler, G., Hurtcrcr, J., Leibl, H., Wolff, K., Stingl, G., Expression of Thy-1 antigen by murine epidermal cells (1983) J Invest Dermatol, 81, pp. 282-285; Ikrgstrcsscr, P.R., Tigclaar, R.E., Dees, J.H., Sirei-Lein, J.W., Thy-1 antigen-bearing dendritic cells populate murine epidermis (1983) J Invest Dermatol, 81, pp. 286-288; Stingl, G., Gunter, K.C., Tschaehler, E., Yamada, H.…	Huber, H.; Klinische Forschergruppe Allergie an der, Hautklinik der Johannes-Gutenberg-Universit?tGermany								10182438			7620366	English	Int. Arch. Allergy Immunol.	Article	Final		Scopus	2-s2.0-0029019330
Sontag Y., Guikers C.L.H., Vink A.A., De Gruijl F.R., Van Loveren H., Garssen J., Roza L., Kripke M.L., Van der Leun J.C., Van Vloten W.A.	6602970520;6508355382;35580076600;7006255101;56148597800;7006651532;7003670528;7101915890;35479691000;7005841351;	Cells with UV-specific DNA damage are present in murine lymph nodes after in vivo UV irradiation	1995	Journal of Investigative Dermatology	104	5		734	738		52	10.1111/1523-1747.ep12606971	https://www.scopus.com/inward/record.uri?eid=2-s2.0-0029043564&doi=10.1111%2f1523-1747.ep12606971&partnerID=40&md5=42c5ecb5fc2e31a7ae9c1d071484a4be	Department of Deramtology, Utrecht University, P.O. Box 85500, 3508 GA Utrecht, Netherlands	Sontag, Y., Department of Deramtology, Utrecht University, P.O. Box 85500, 3508 GA Utrecht, Netherlands; Guikers, C.L.H., Department of Deramtology, Utrecht University, P.O. Box 85500, 3508 GA Utrecht, Netherlands; Vink, A.A., Department of Deramtology, Utrecht University, P.O. Box 85500, 3508 GA Utrecht, Netherlands; De Gruijl, F.R., Department of Deramtology, Utrecht University, P.O. Box 85500,…	Ultraviolet radiation is absorbed in the skin, especially in the epidermis. After ultraviolet irradiation the number of major histocompatibility complex class II+, adenosine triphosphatase+ Langerhans cells and Thy-1+ dendritic epidermal cells in the epidermis decreases. Whether this decrease is due to migration of these cells or to loss of membrane markers is not clear. To address this question …	Migration; Photoimmunology; Thymine dimers	major histocompatibility antigen class 2; animal experiment; animal model; animal tissue; article; controlled study; DNA damage; female; lymph node; mouse; nonhuman; priority journal; T lymphocyte; ultraviolet radiation						Sontag, Y.; Department of Deramtology, Utrecht University, P.O. Box 85500, 3508 GA Utrecht, Netherlands			Nature Publishing Group					0022202X		JIDEA	7738349	English	J. INVEST. DERMATOL.	Article	Final	Open Access	Scopus	2-s2.0-0029043564
Leclercq G., Smedt M.D., Plum J.	7102003388;36593477300;7007064115;	Cytokine dependence of Vγ 3 thymocytes: Mature but not immature Vγ3 cells require endogenous IL-2 and IL-7 to survive- evidence for cytokine redundancy	1995	International Immunology	7	5		843	851		20	10.1093/intimm/7.5.843	https://www.scopus.com/inward/record.uri?eid=2-s2.0-0028989131&doi=10.1093%2fintimm%2f7.5.843&partnerID=40&md5=48f0203d9c07a03847514c148587f364	Department of Clinical Chemistry, University of Ghent, University Hospital, Blok A, De Pintelaan 185, B-9000 Ghent, Belgium	Leclercq, G., Department of Clinical Chemistry, University of Ghent, University Hospital, Blok A, De Pintelaan 185, B-9000 Ghent, Belgium; Smedt, M.D., Department of Clinical Chemistry, University of Ghent, University Hospital, Blok A, De Pintelaan 185, B-9000 Ghent, Belgium; Plum, J., Department of Clinical Chemistry, University of Ghent, University Hospital, Blok A, De Pintelaan 185, B-9000 Ghe…	It has previously been described that Vγ3 cells can proliferate extensively in vitro in the presence of different cytokines. Here, the role of cytokines in the maintenance of Vγ3 cells in the thymus has been determined. Culture of fetal thymocytes in cell suspension for 24 h showed that, whereas immature TCRlowHSAhighVγ3 cells remained viable, all mature TCRhighHSAlowVγ cells died. These cells di…	Apoptosis; Migration; Survival; Vγ3 cells	cell dna; interleukin 2; interleukin 2 receptor; interleukin 4; interleukin 7; monoclonal antibody; t lymphocyte receptor; animal cell; animal tissue; apoptosis; article; cell culture; cell suspension; dna degradation; fetus; fetus cell; flow cytometry; gel electrophoresis; mouse; nonhuman; organ culture; priority journal; protein synthesis; thymocyte; thymus; Animal; Antibodies, Monoclonal; Apop…		interleukin 2, 85898-30-2; Antibodies, Monoclonal; Interleukin-2; Interleukin-4, 207137-56-2; Interleukin-7; Receptors, Antigen, T-Cell, gamma-delta; Receptors, Interleukin-2			Carding, S.R., Jenkinson, E.J., Kingston, R., Hayday, A.C., Bottomly, K., Owen, J.J.T., Developmental control of lymphokine gene expression in fetal thymocytes during T-cell ontogeny (1989) Proc Natl Acad Sci. USA, 86, p. 3342; Montgomery, R.A., Dalman, M.J., Analysis of cytokine gene expression during fetal thymic ontogeny using the polymerase chain reaction (1991) J. Immunol, pp. 147-554; Moore…	Plum, J.; Department of Clinical Chemistry, University of Ghent, University Hospital, Blok A, De Pintelaan 185, B-9000 Ghent, Belgium								9538178		INIME	7547710	English	Int. Immunol.	Article	Final		Scopus	2-s2.0-0028989131
Cao X., Shores E.W., Hu-Li J., Anver M.R., Kelsail B.L., Russell S.M., Drago J., Noguchi M., Grinberg A., Bloom E.T., Paul W.E., Katz S.I., Love P.E., Leonard W.J.	57199863257;7006006165;6701568073;57194868596;25948517400;7401538142;57206436066;7402827806;7101758196;7102733234;35419531400;7403462507;7101960017;23042087200;	Defective lymphoid development in mice lacking expression of the common cytokine receptor γ chain	1995	Immunity	2	3		223	238		759	10.1016/1074-7613(95)90047-0	https://www.scopus.com/inward/record.uri?eid=2-s2.0-0028925778&doi=10.1016%2f1074-7613%2895%2990047-0&partnerID=40&md5=4e92eb8ad6e911c6405f8a10a043b58b	Laboratory of Molecular Immunology, National Heart, Lung, Blood Institute, Bethesda, MD 20892, United States; Laboratory of Immunology Laboratory, Clinical Investigation National Institute of Allergy and Infectious Diseases Bethesda, MD 20892, United States; Mucosal Immunity Section Laboratory, Clinical Investigation National Institute of Allergy and Infectious Diseases Bethesda, MD 20892, United…	Cao, X., Laboratory of Molecular Immunology, National Heart, Lung, Blood Institute, Bethesda, MD 20892, United States; Shores, E.W., Division of Hematologic Products Division of Cellular, Gene Therapies Center for Biologics Evaluation and Research Food and Drug Administration Bethesda, MD 20892, United States; Hu-Li, J., Laboratory of Immunology Laboratory, Clinical Investigation National Institu…	The common γ chain (γc) of the IL-2, IL-4, IL-7, IL-9, and IL-15 receptors is defective in humans with XSCID. Mice lacking γc expression had poplastic thymuses; the thymocytes responded to γc-independent mitogens, but not γc-dependent stimuli. Splenic T cells were diminished at 3 weeks of age, but CD4+ T cells markedly increased by 4 weeks. B cells were greatly diminished, in contrast with the si…		cytokine; cytokine receptor; animal experiment; animal model; article; b lymphocyte; combined immunodeficiency; controlled study; development; genetic disorder; immune deficiency; lymphoid tissue; mouse; nonhuman; priority journal; receptor gene; Animal; B-Lymphocytes; Base Sequence; Cecal Diseases; Cell Differentiation; Dendritic Cells; Epithelial Cells; Female; Flow Cytometry; Inflammation; Kil…	GENBANK: U21795	Receptors, Interleukin			Allison, Havran, The immunobiology of T cells with invariant y8 antigen receptors (1991) Annu. Rev. Immunol., 9, pp. 679-705; Bamford, Grant, Burton, Peters, Kurys, Goldman, Brennan, Waldmann, The interleukin (IL)-2 receptor beta chain is shared by IL-2 and a cytokine, provisionally designated IL-T, that stimulates T cell proliferation and the induction of lymphokine activated killer cells (1994)…	Cao, X.; Laboratory of Molecular Immunology, National Heart, Lung, Blood Institute, Bethesda, MD 20892, United States								10747613		IUNIE	7697543	English	Immunity	Article	Final	Open Access	Scopus	2-s2.0-0028925778
Park S.Y., Saijo K., Takahashi T., Osawa M., Areas H., Hirayama N., Miyake K., Nakauchi H., Shirasawa T., Saito T.	35754925400;7006339471;7407476297;55423088800;7006548315;7102432471;16751140300;35393672800;7005915179;36063820300;	Developmental defects of lymphoid cells in Jak3 kinase-deficient mice	1995	Immunity	3	6		771	782		404	10.1016/1074-7613(95)90066-7	https://www.scopus.com/inward/record.uri?eid=2-s2.0-0029550822&doi=10.1016%2f1074-7613%2895%2990066-7&partnerID=40&md5=24120eb2135796146eba5463e1da0c0d	Division of Molecular Genetics Center for Biomedical Science Chiba University School of Medicine, 1-8-1 Inohana, Chuo-ku Chiba, 260, Japan; Department of Molecular Pathology Tokyo Metropolitan Institute of Gerontology 35-2, Sakae-cho, Itabashi-ku Tokyo, 173, Japan; Department of Immunology University, Tsukuba School of Medicine 1-1-1 ten-noudai, Tsukuba-city Ibaragi, 305, Japan; Department of Imm…	Park, S.Y., Division of Molecular Genetics Center for Biomedical Science Chiba University School of Medicine, 1-8-1 Inohana, Chuo-ku Chiba, 260, Japan; Saijo, K., Division of Molecular Genetics Center for Biomedical Science Chiba University School of Medicine, 1-8-1 Inohana, Chuo-ku Chiba, 260, Japan; Takahashi, T., Department of Molecular Pathology Tokyo Metropolitan Institute of Gerontology 35-…	Jak3 is a tyrosine kinase mediating cytokine receptor signaling through the association with the common y chain of the cytokine receptors such as IL-2, IL-4, IL-7, IL-9, and IL-15. Unlike other members of the Jak family, the expression of Jak3 is highly restricted In hematopoietic cells. To elucidate in vivo function of Jak3, Jak3-deficient mice were generated by homologous recombination. Mice ho…		cytokine receptor; interleukin 2; interleukin 4; interleukin 7; protein tyrosine kinase; animal experiment; article; b lymphocyte; bone marrow; enzyme deficiency; flow cytometry; lymphocyte differentiation; lymphoid cell; mouse; mutant; nonhuman; priority journal; stem cell; t lymphocyte; Animals; Animals, Newborn; Base Sequence; Cell Differentiation; Hematopoietic Stem Cells; Immunophenotyping; …		Jak3 protein, mouse, EC 2.7.1.112; Janus Kinase 3, EC 2.7.1.112; Protein-Tyrosine Kinases, EC 2.7.1.112			Boussiotis, Barber, Nakarai, Freeman, Gribben, Bernstein, D'Andrea, Nadler, Prevention of T cell energy by signaling through the γc chain of the IL-2 receptor (1994) Science, 266, pp. 1039-1042; Cao, Shores, Hu-Li, Anver, Kelsall, Russell, Drago, Leonard, Defective lymphoid development in mice lacking expression of the common cytokine receptor γ chain (1995) Immunity, 2, pp. 223-238; Chomczynski,…	Park, S.Y.; Division of Molecular Genetics Center for Biomedical Science Chiba University School of Medicine, 1-8-1 Inohana, Chuo-ku Chiba, 260, Japan								10747613		IUNIE	8777722	English	Immunity	Article	Final	Open Access	Scopus	2-s2.0-0029550822
Aiba S., Nakagawa S., Ozawa H., Tagami H.	35393575200;55708489000;7202195353;7101834005;	Different expression of E-cadherin by two cutaneous γ/δ TcR+ T-cell subsets, Vγ5- and Vγ5+ γ/δ TcR+ T cells	1995	Journal of Investigative Dermatology	105	3		379	382		16	10.1111/1523-1747.ep12320959	https://www.scopus.com/inward/record.uri?eid=2-s2.0-0029056977&doi=10.1111%2f1523-1747.ep12320959&partnerID=40&md5=9f165892d06ee7f11dfac5176802dc68	Department of Dermatology, Tohoku University School of Medicine, 1-1 Seiryo-machi, Sendai 980, Japan	Aiba, S., Department of Dermatology, Tohoku University School of Medicine, 1-1 Seiryo-machi, Sendai 980, Japan; Nakagawa, S., Department of Dermatology, Tohoku University School of Medicine, 1-1 Seiryo-machi, Sendai 980, Japan; Ozawa, H., Department of Dermatology, Tohoku University School of Medicine, 1-1 Seiryo-machi, Sendai 980, Japan; Tagami, H., Department of Dermatology, Tohoku University S…	Recently we have demonstrated that, besides Vγ5+ γ/δ TcR+ T cells (Vγ5+ γ/δ T cells), Vγ5- γ/δ TcR+ T cells (Vγ5- γ/δ T cells) are also present in murine skin. In the present study, to characterize the functional differences between these two different cutaneous γ/δ T cells we examined the expression pattern of E-cadherin and its two integrins. After co-culturing of Ly-5+ epidermal cells and migr…		integrin; monoclonal antibody; uvomorulin; animal cell; article; controlled study; flow cytometry; gene expression; mouse; nonhuman; priority journal; T lymphocyte subpopulation		uvomorulin, 112956-45-3		Takara, Japan; American Type Culture Collection, United States; Becton Dickinson, United States; Du Pont New England Nuclear, United States; Pharmingen, United States		Aiba, S.; Department of Dermatology, Tohoku University School of Medicine, 1-1 Seiryo-machi, Sendai 980, Japan			Nature Publishing Group					0022202X		JIDEA	7665916	English	J. INVEST. DERMATOL.	Article	Final	Open Access	Scopus	2-s2.0-0029056977
Park S.Y., Arase H., Wakizaka K., Hirayama N., Masaki S., Sato S.‐I., Ravetch J.V., Saito T.	56097974000;7006548315;6602635942;7102432471;7006265294;56042426900;7006506446;55689789100;	Differential contribution of the FcRγ chain to the surface expression of the T cell receptor among T cells localized in epithelia: analysis of FcRγ‐deficient mice	1995	European Journal of Immunology	25	7		2107	2110		45	10.1002/eji.1830250746	https://www.scopus.com/inward/record.uri?eid=2-s2.0-0028979462&doi=10.1002%2feji.1830250746&partnerID=40&md5=7f6741f3369f026caa740ec2e3cac152	Division of Molecular Genetics, Center for Biomedical Science, Chiba University School of Medicine, Chiba, Japan; Department of Immunology, National Institute of Health, Tokyo, Japan; Pharmacology Department, Pharmaceutical Research Laboratories, Kyowa Hakko Kogyo Co, Ltd., Shizuoka, Japan; Memorial Sloan-Kettering Cancer Center, New York, United States	Park, S.Y., Division of Molecular Genetics, Center for Biomedical Science, Chiba University School of Medicine, Chiba, Japan; Arase, H., Division of Molecular Genetics, Center for Biomedical Science, Chiba University School of Medicine, Chiba, Japan; Wakizaka, K., Division of Molecular Genetics, Center for Biomedical Science, Chiba University School of Medicine, Chiba, Japan; Hirayama, N., Depart…	The function of the Fc receptors γ chain (FcRγ) for the expression of the T cell receptor (TCR) complex and for T cell development, especially for T cells localized in epithelia, was investigated by analyzing FcRγ‐deficient mice. In wildtype mice, CD8αα+β?TCRαβ+ T cells of intestinal intraepithelial lymphocytes (i‐IEL) utilized CD3ζ homodimers and ζ‐FcRγ heterodimers, whereas CD8α α+β?TCRγδ+ i‐IE…	Development; Epithelial T cells; FcRγ; Knockout mice; T cell receptor expression	cd8 antigen; Fc receptor; t lymphocyte receptor alpha chain; t lymphocyte receptor beta chain; t lymphocyte receptor delta chain; t lymphocyte receptor gamma chain; animal cell; article; dendritic cell; epidermis cell; immune deficiency; intestine epithelium; mouse; nonhuman; priority journal; Animal; CD8-Positive T-Lymphocytes; Epithelial Cells; Female; Macromolecular Systems; Male; Mice; Mice, …		Macromolecular Systems; Receptors, Antigen, T-Cell; Receptors, Fc			Ravetch, J.V., Kinet, J.‐P., (1991) Annu. Rev. Immunol., 9, p. 457; Ra, C., Jouvin, M.‐H.E., Blank, U., Kinet, J.‐P., (1989) Nature, 341, p. 752; Vivier, E., Rochet, N., Kochan, J.P., Presky, D.H., Schlossman, S.T., Anderson, P., (1991) J. Immunol., 147, p. 4263; Orloff, D.G., Ra, C., Frank, S.J., Klausner, R.D., Kinet, J.‐P., (1990) Nature, 347, p. 189; Koyasu, S., D'Adamio, L., Arulanandam, A.R…	Saito, T.; Division of Molecular Genetics, Center for Biomedical Science, Chiba University School of Medicine, 1-8-1 Inohana, Chuo, Chiba, 260, Japan								142980			7621885	English	Eur. J. Immunol.	Article	Final		Scopus	2-s2.0-0028979462
Suwa H., Tanaka T., Kitamura F., Shiohara T., Kuida K., Miyasaka M.	7005544930;55628537571;7005150866;7005668489;7003705963;8051660500;	Dysregulated expression of the IL-2 receptor β-chain abrogates development of NK cells and Thy-1+ dendritic epidermal cells in transgenic mice	1995	International Immunology	7	9		1441	1449		16	10.1093/intimm/7.9.1441	https://www.scopus.com/inward/record.uri?eid=2-s2.0-0029128452&doi=10.1093%2fintimm%2f7.9.1441&partnerID=40&md5=928e61ba7c2e1b6b09690a99d2ab9f46	Department of Immunology, Tokyo Metropolitan Institute of Medical Science, 18-22, Honkomagome 3-chome, Bunkyp-ku, Tokyo 113, Japan; Division of Bioregulation, Biomedical Research Center, Osaka University Medical School,, 2-2 Yamadaoka, Suita 565, Japan; Department of Dermatology, Kyorin University School of Medicine,, 20-2, Shinkawa 6-chome, Mitaka, Tokyo 181, Japan	Suwa, H., Department of Immunology, Tokyo Metropolitan Institute of Medical Science, 18-22, Honkomagome 3-chome, Bunkyp-ku, Tokyo 113, Japan; Tanaka, T., Department of Immunology, Tokyo Metropolitan Institute of Medical Science, 18-22, Honkomagome 3-chome, Bunkyp-ku, Tokyo 113, Japan, Division of Bioregulation, Biomedical Research Center, Osaka University Medical School,, 2-2 Yamadaoka, Suita 565…	The IL-2 receptor β-chain (IL-2Rβ), a specificity-determining subunlt In the IL-2R complex with a restricted tissue distribution pattern, Is essential for signal transductlon. Our previous studies demonstrate that the continuous treatment of mice with anti-IL-2Rβ) resulted in the complete disappearance of NK cells and Thy-1+ dendritic epidermal cells (Thy-1+ dEC), suggesting that signals through …	IL-2 receptor β chain; NK cell; T cell development; Transgenic mice	cd4 antigen; cd8 antigen; interleukin 2 receptor; receptor subunit; animal cell; article; epidermis cell; hematopoietic cell; mouse; natural killer cell; nonhuman; priority journal; signal transduction; t lymphocyte; t lymphocyte subpopulation; tissue distribution; transgenic mouse; Animal; Antigens, Thy-1; Base Sequence; Dendritic Cells; Epidermis; Female; Killer Cells, Natural; Lymphocyte Subse…		Antigens, Thy-1; Receptors, Interleukin-2			Taniguchi, T., Minami, Y., The IL-2/IL-2 receptor system: A current overview (1993) Cell, 73, p. 5; Tsudo, M., Karasuyama, H., Kitamura, F., Nagasaka, Y., Tanaka, T., Miyasaka, M., Reconstitution of a functional IL-2 receptor by the p-chain cDNA- a newly acquired receptor transduces negative signal (1989) J. Immunol, 143, p. 4039; Tanaka, T., Tsudo, M., Karasuyama, H., Toyama, N., Hatakeyama, M.,…	Suwa, H.; Division of Bioregulation, Biomedical Research Center, Osaka University Medical School, 2-2 Yamadaoka, Suita 565, Japan								9538178		INIME	7495752	English	Int. Immunol.	Article	Final		Scopus	2-s2.0-0029128452
[truncated: 206 more rows]
